# Supplementary material for: Genetic analysis of ATP7B in 102 south Indian families with Wilson disease
Source: PubMed Central journal article supplement (PMC6502322; doi:10.1371/journal.pone.0215779), 2019-05-06
Supplement: pone.0215779.s001.pdf [file pone.0215779.s001.pdf]

**S1 File:** Supporting multiple Figures and Tables

**Genetic analysis of *ATP7B* in 102 south Indian families with Wilson disease**

Nivedita Singh<sup>1</sup>, Pradeep Kallollimath<sup>2</sup>, Mohd Hussain Shah<sup>1</sup>, Saketh Kapoor<sup>1</sup>, Vishwanath Kumble Bhat<sup>1</sup>, Lakshminarayanapuram Gopal Viswanathan <sup>2</sup>, Madhu Nagappa<sup>2</sup>, Parayil S. Bindu<sup>2</sup>, Arun B. Taly<sup>2</sup>, Sanjib Sinha<sup>2</sup>, Arun Kumar<sup>1\*</sup>

<sup>1</sup>Department of Molecular Reproduction, Development and Genetics, Indian Institute of Science, Bangalore, India

<sup>2</sup>Department of Neurology, National Institute of Mental Health and Neuro Sciences, Bangalore, India

\*Corresponding author

Email: arunk@iisc.ac.in

Family-A

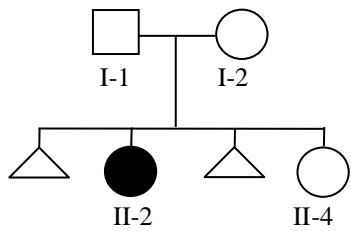

Family-D

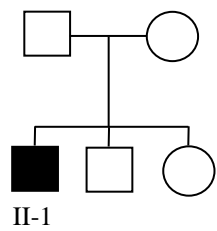

Family-W

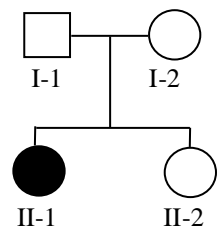

Family-N

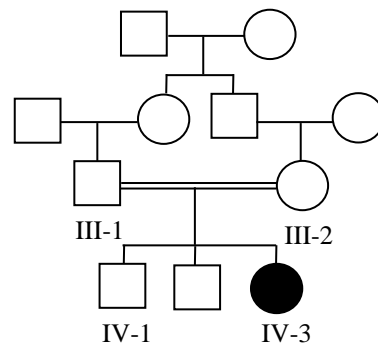

Family-Q

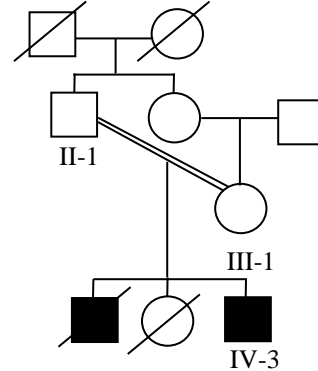

Family-34

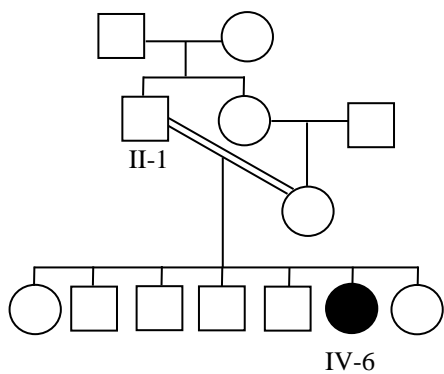

Family-62

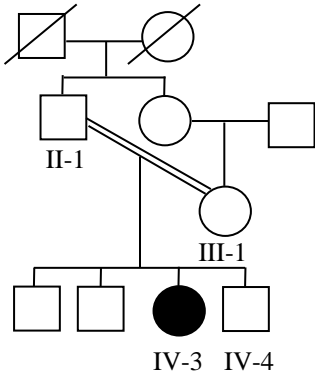

Family-64

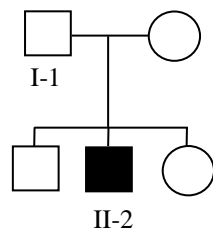

Family-69

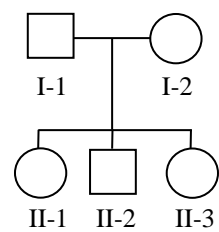

Family-75

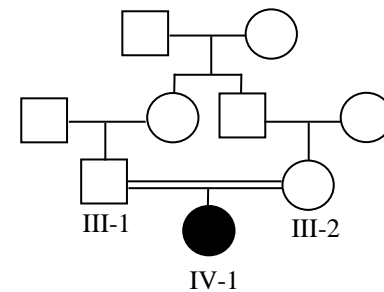

Family-93

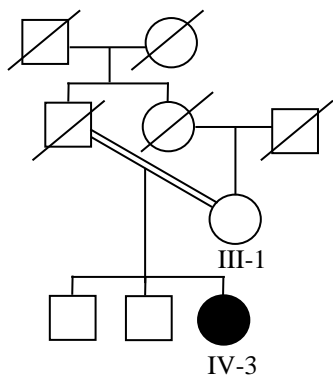

Family-419

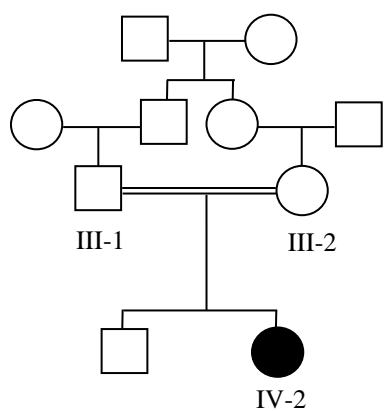

Family-L

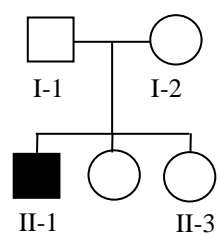

Family-S

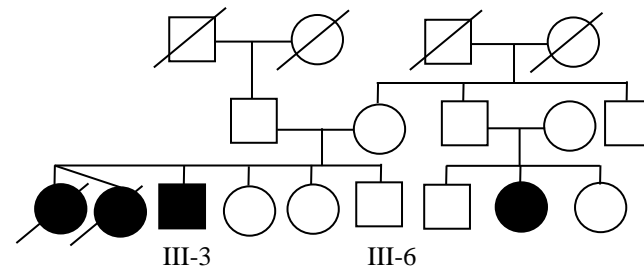

Family-82

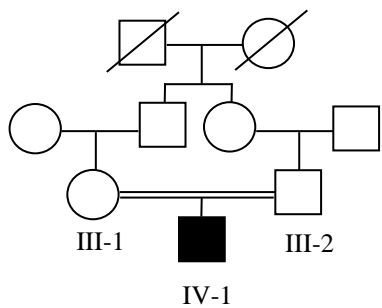

Family-116

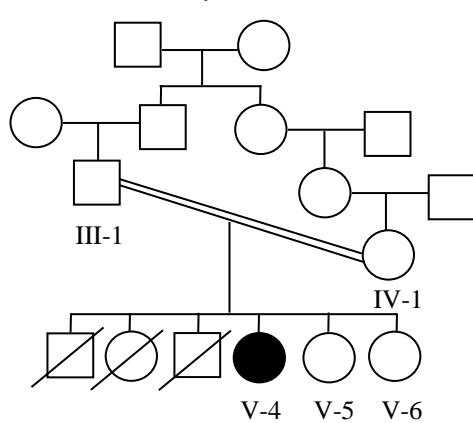

Family-42

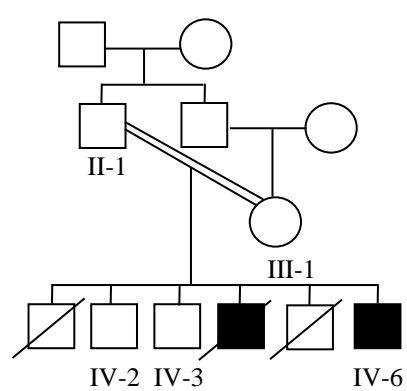

Family-50

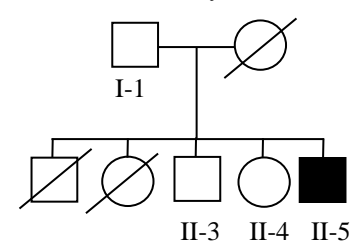

Family-53

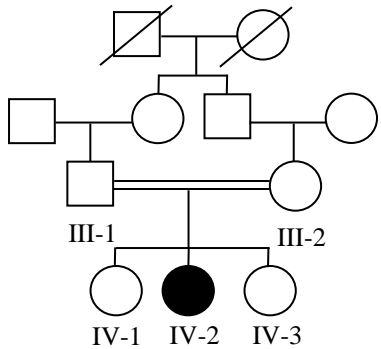

Family-74

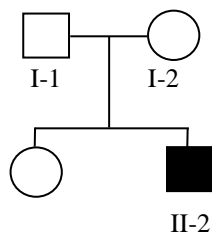

Family-V

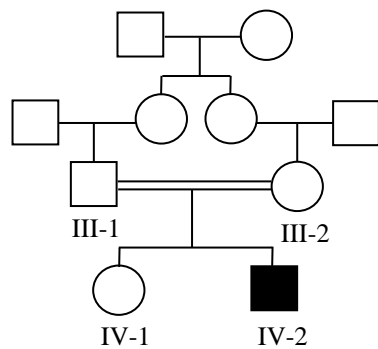

Family-O

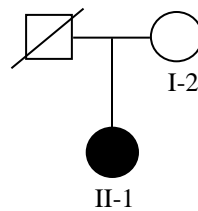

Family-38

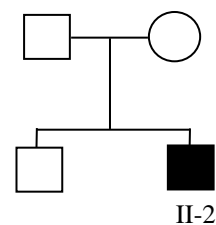

Family-58

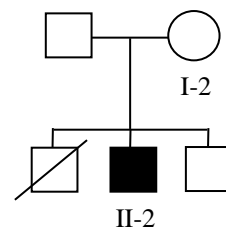

Family-78

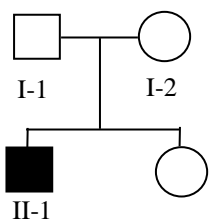

Family-41B

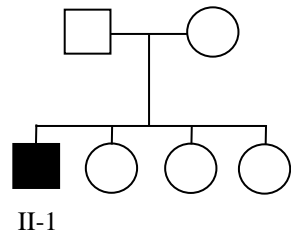

Family-K

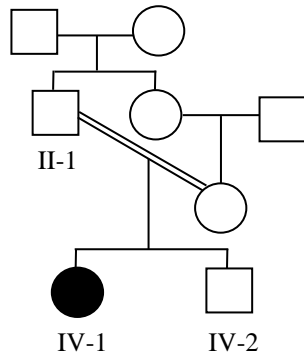

Family-Y

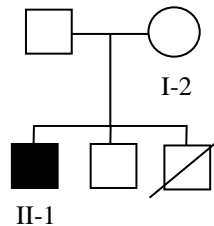

Family-57

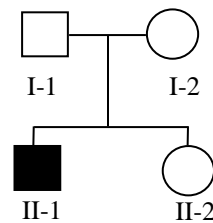

Family-E

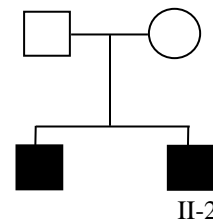

Family-G

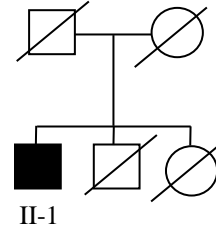

Family-59

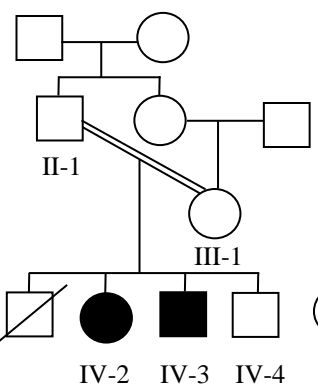

Family-91

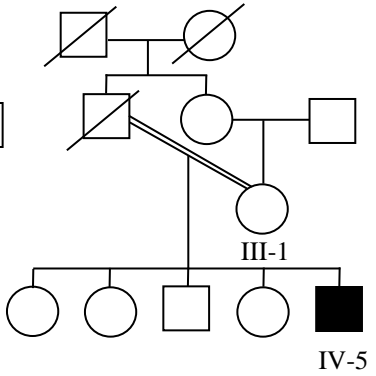

Family-P

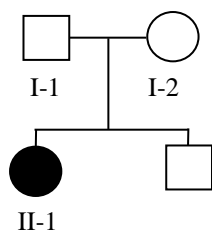

Family-85

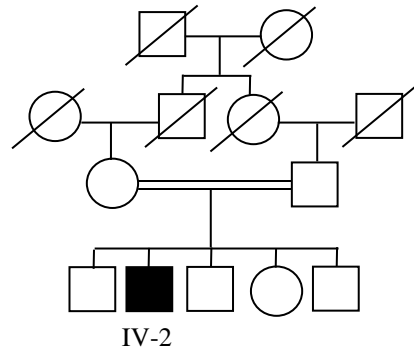

Family-T

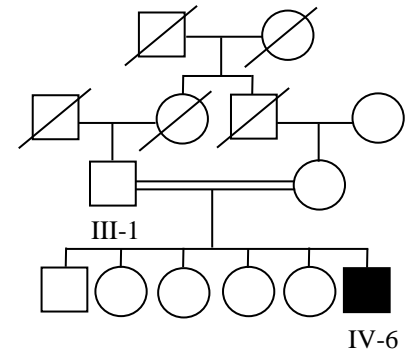

Family-35

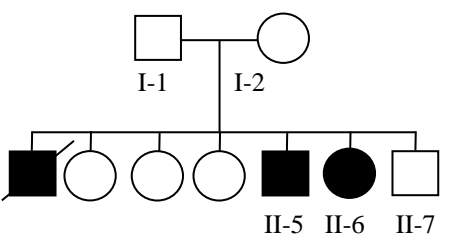

Family-47

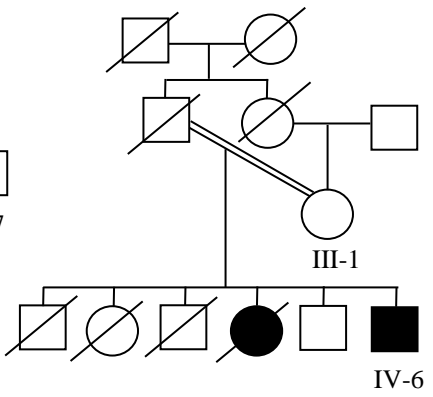

Family-55

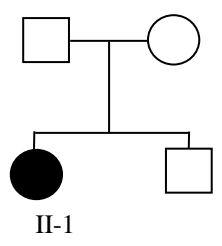

Family-U

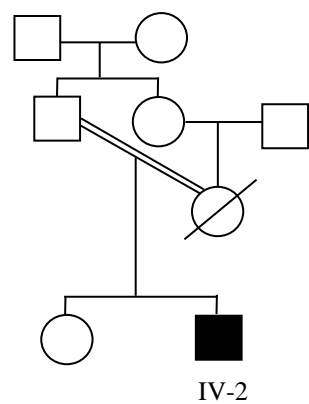

Family-70

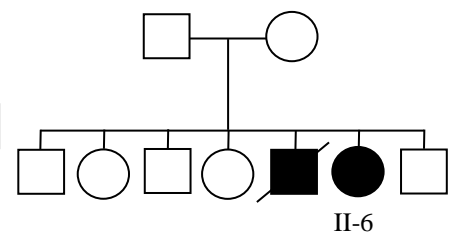

Family-83

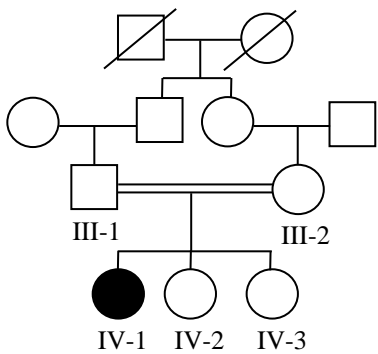

Family-36

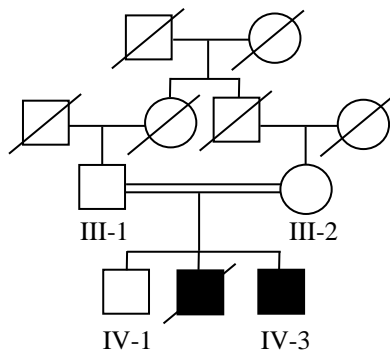

Family-54

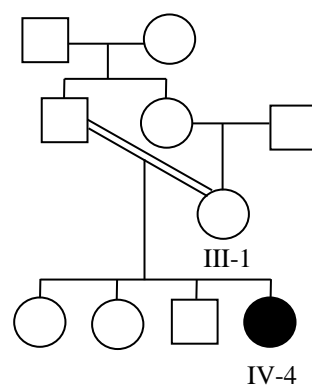

Family-506

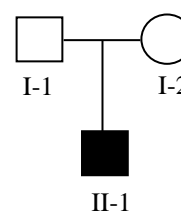

Family-128

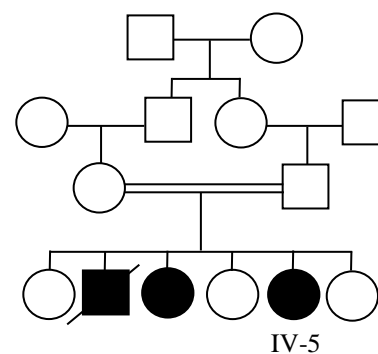

Family-31

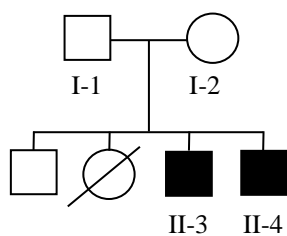

Family-B

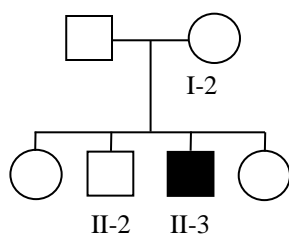

Family-C

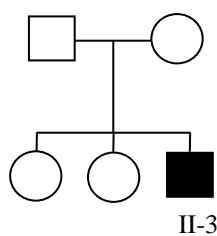

Family-M

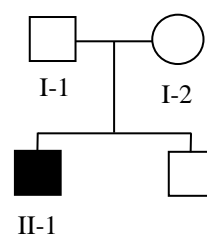

Family-80

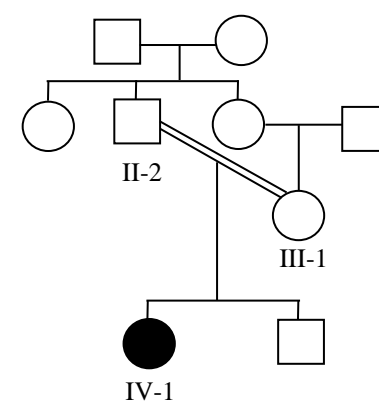

Family-32

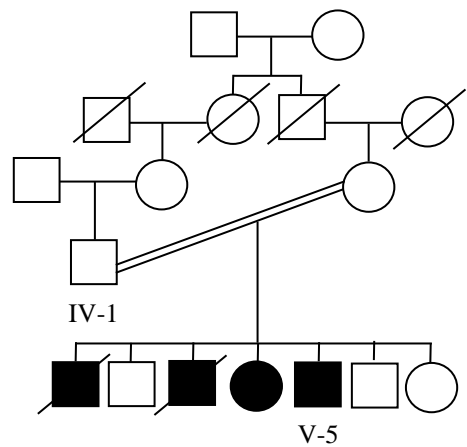

Family-40

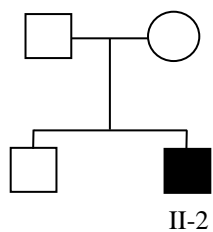

Family-43

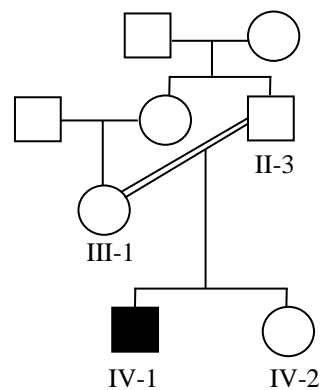

Family-52

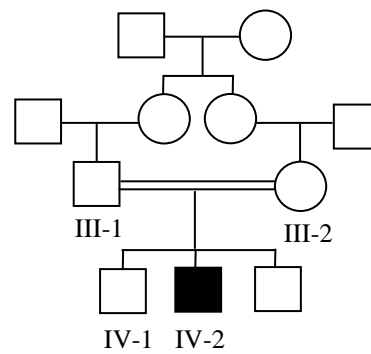

Family-46

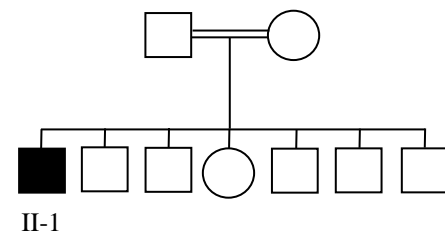

Family-49

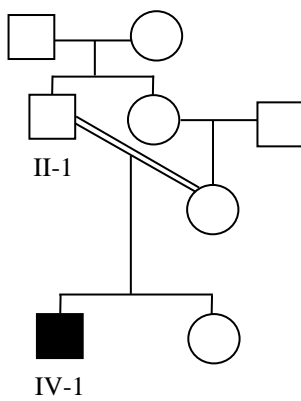

Family-56

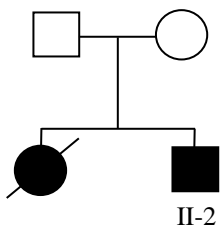

Family-60

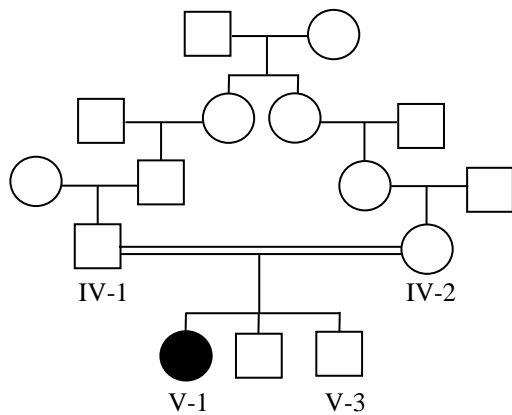

Family-63

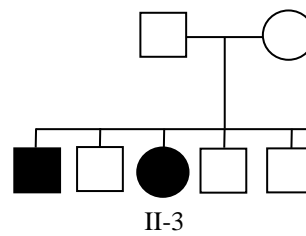

Family-89

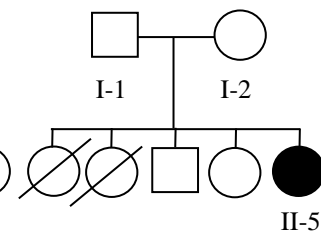

Family-67

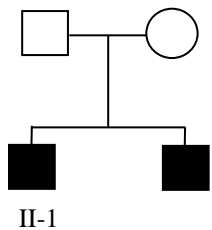

Family-72

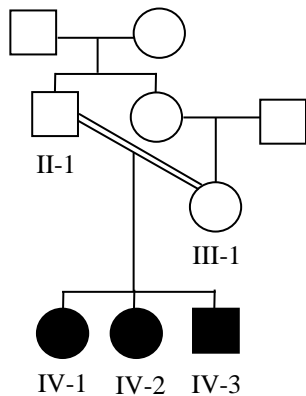

Family-76

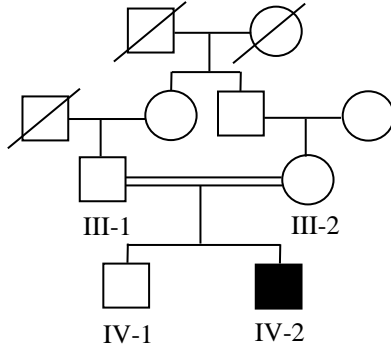

Family-77

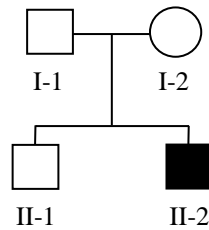

Family-90

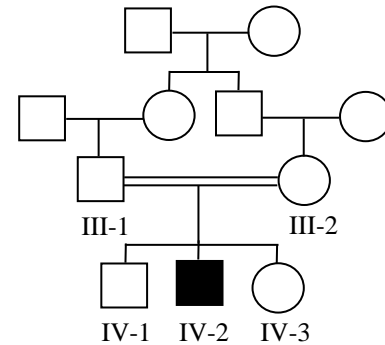

Family-86

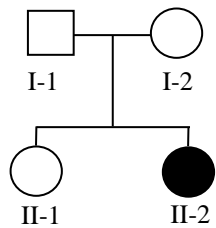

Family-98

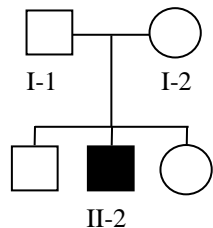

Family-100

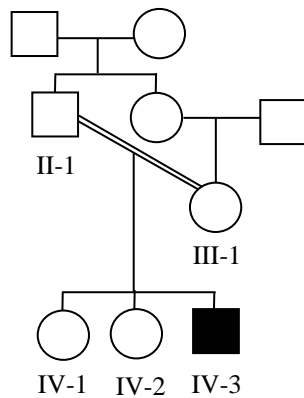

Family-101

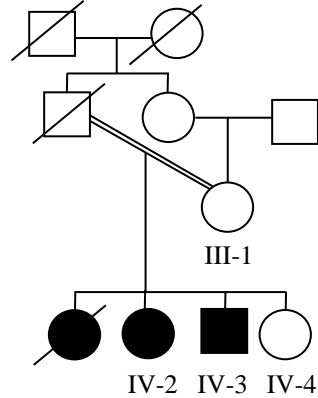

Family-118

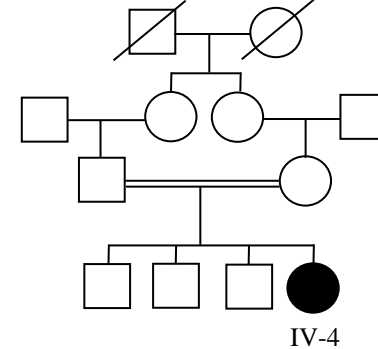



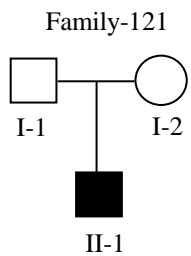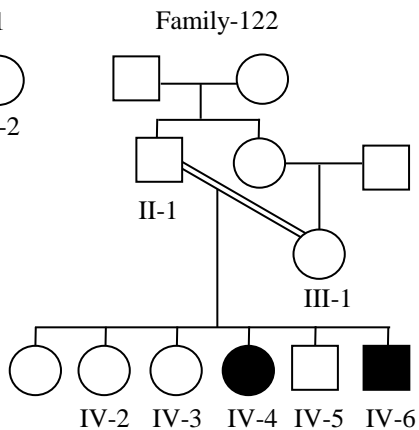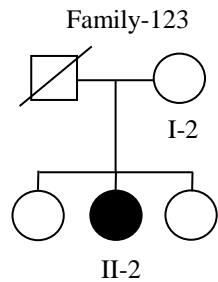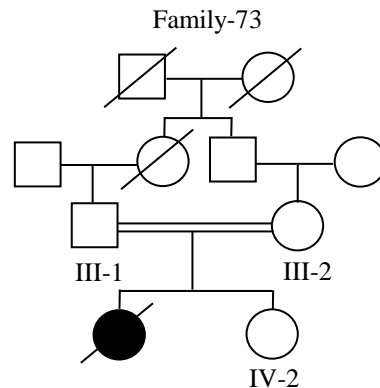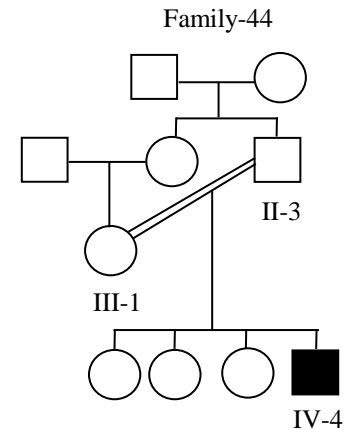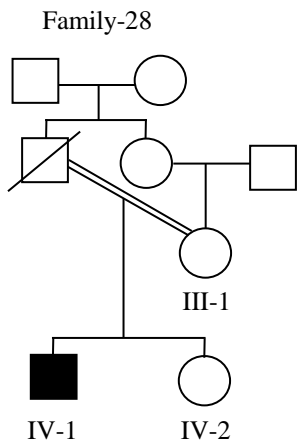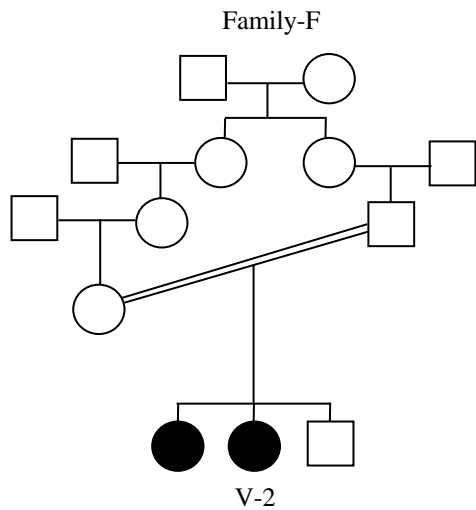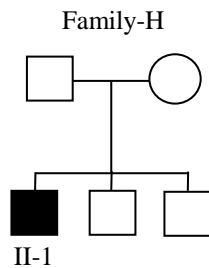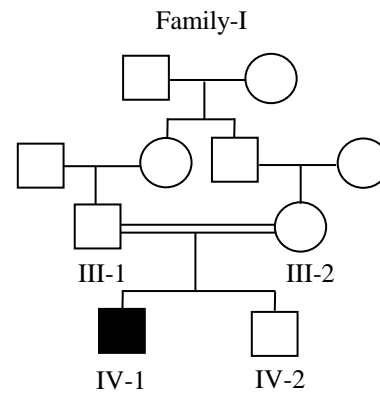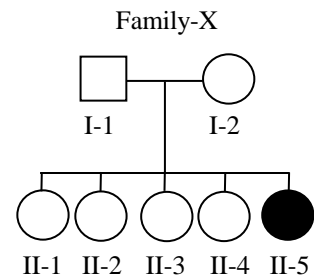

Family-R

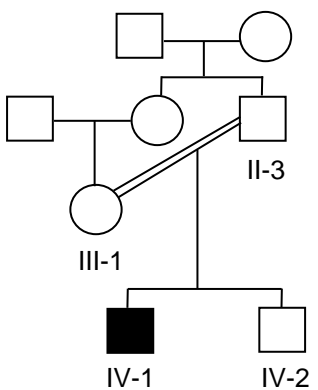

Family-45

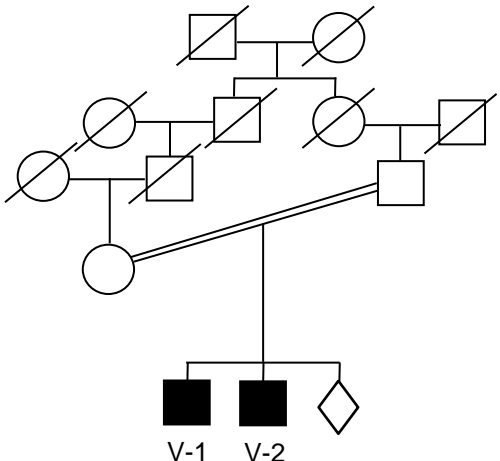

Family-33

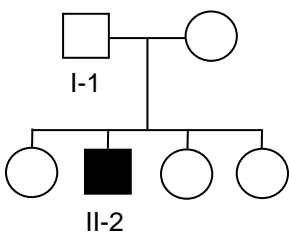

Family-41

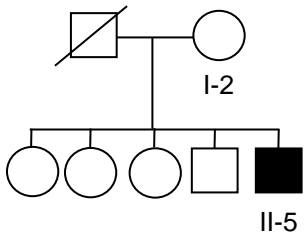

Family-51

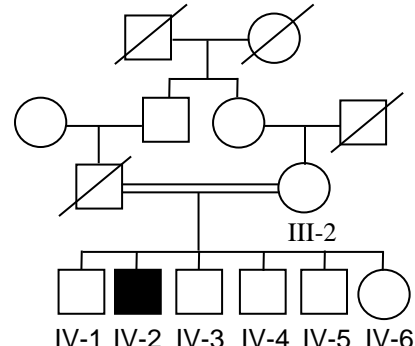

Family-84

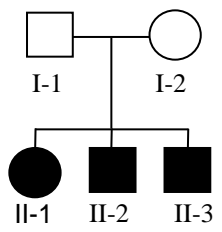

Family-120

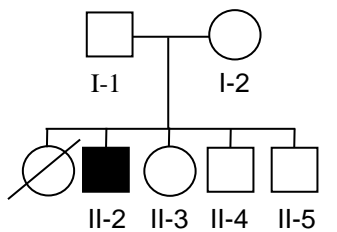

Family-65

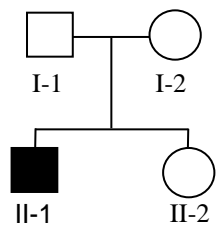

Family-71

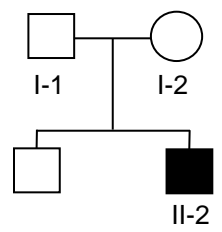

Family-112

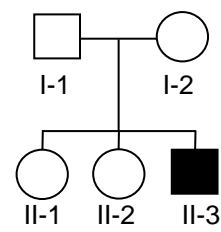

Family-94

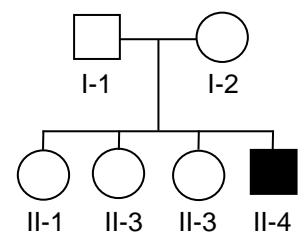

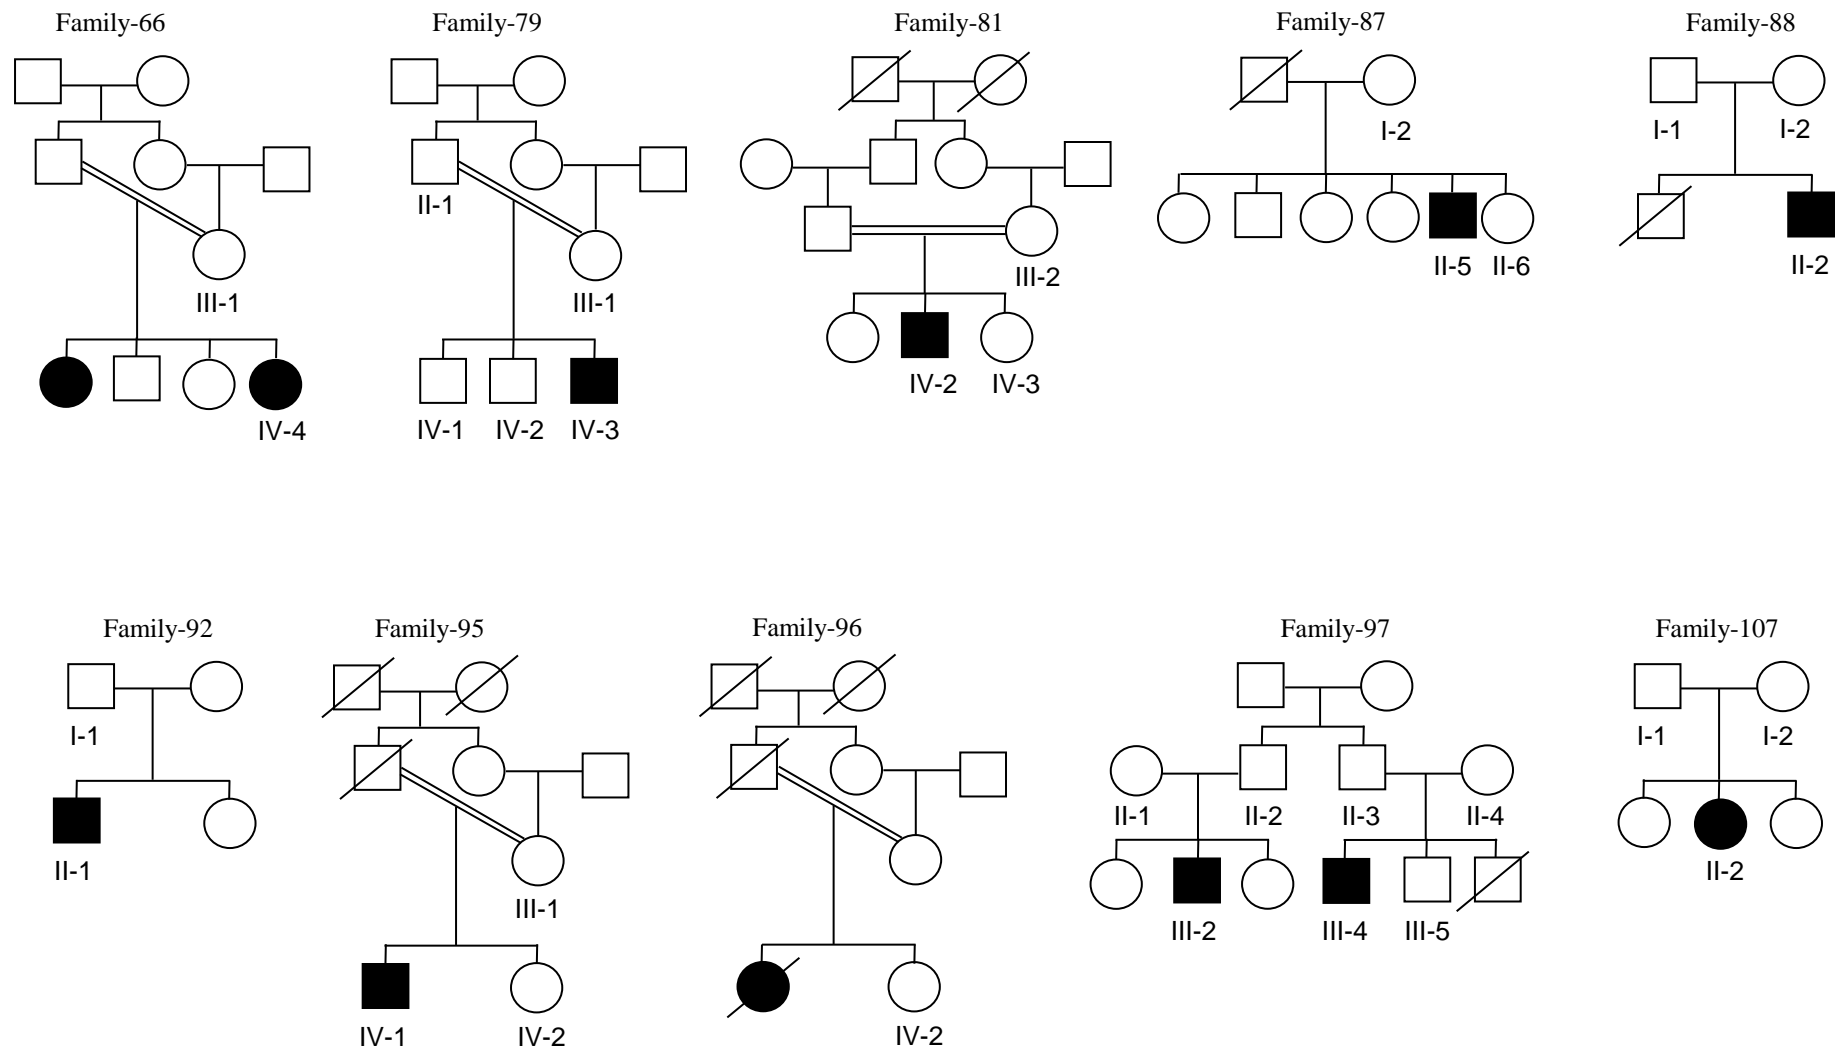

**Fig A. Pedigrees of WD families.** The individuals numbered in the pedigrees are the ones from whom the genomic DNA samples were isolated.

| Chromosomal position (bp) | Marker                              | Family-B | Family-90 |
|---------------------------|-------------------------------------|----------|-----------|
| 52477914-52478251         | D13S1325                            | 3        | 4         |
| 52511362                  | rs9535795                           | G        | G         |
| 52511606                  | rs2282057                           | C        | C         |
| 52515354                  | rs1801249                           | T        | T         |
| 52520471                  | rs1801247                           | G        | G         |
| 52520504                  | c.2976C>T                           | C        | C         |
| 52523808                  | rs732774                            | G        | G         |
| 52524499                  | rs1061472                           | A        | A         |
| 52524509                  | rs570594838                         | C        | C         |
| 52524560                  | rs9526811                           | G        | G         |
| 52532510                  | rs372979339                         | C        | C         |
| 52532606                  | rs201213995                         | C        | C         |
| 52542796                  | rs2147363                           | C        | A         |
| 52544805                  | rs1801244                           | G        | G         |
| 52548140                  | rs1801243                           | T        | T         |
| 52549095                  | c.261C>T                            | C        | C         |
| 53549182-52549183         | <b>c.172_173insC (p.Ala58fs*19)</b> | -        | <b>C</b>  |
| 52585548                  | rs2277448                           | A        | C         |
| 52585615                  | c.-142T>C                           | T        | T         |
| 53143966 - 53144249       | D13S773                             | 1        | 1         |
| 53175869 - 53176208       | D13S1305                            | 2        | 3         |

**Fig B. The haplotype analysis to show the founder effect for the c.172\_173insC mutation in 2 families. The disease haplotype is colored in grey, and corresponds to 632.8 Kb of DNA.**

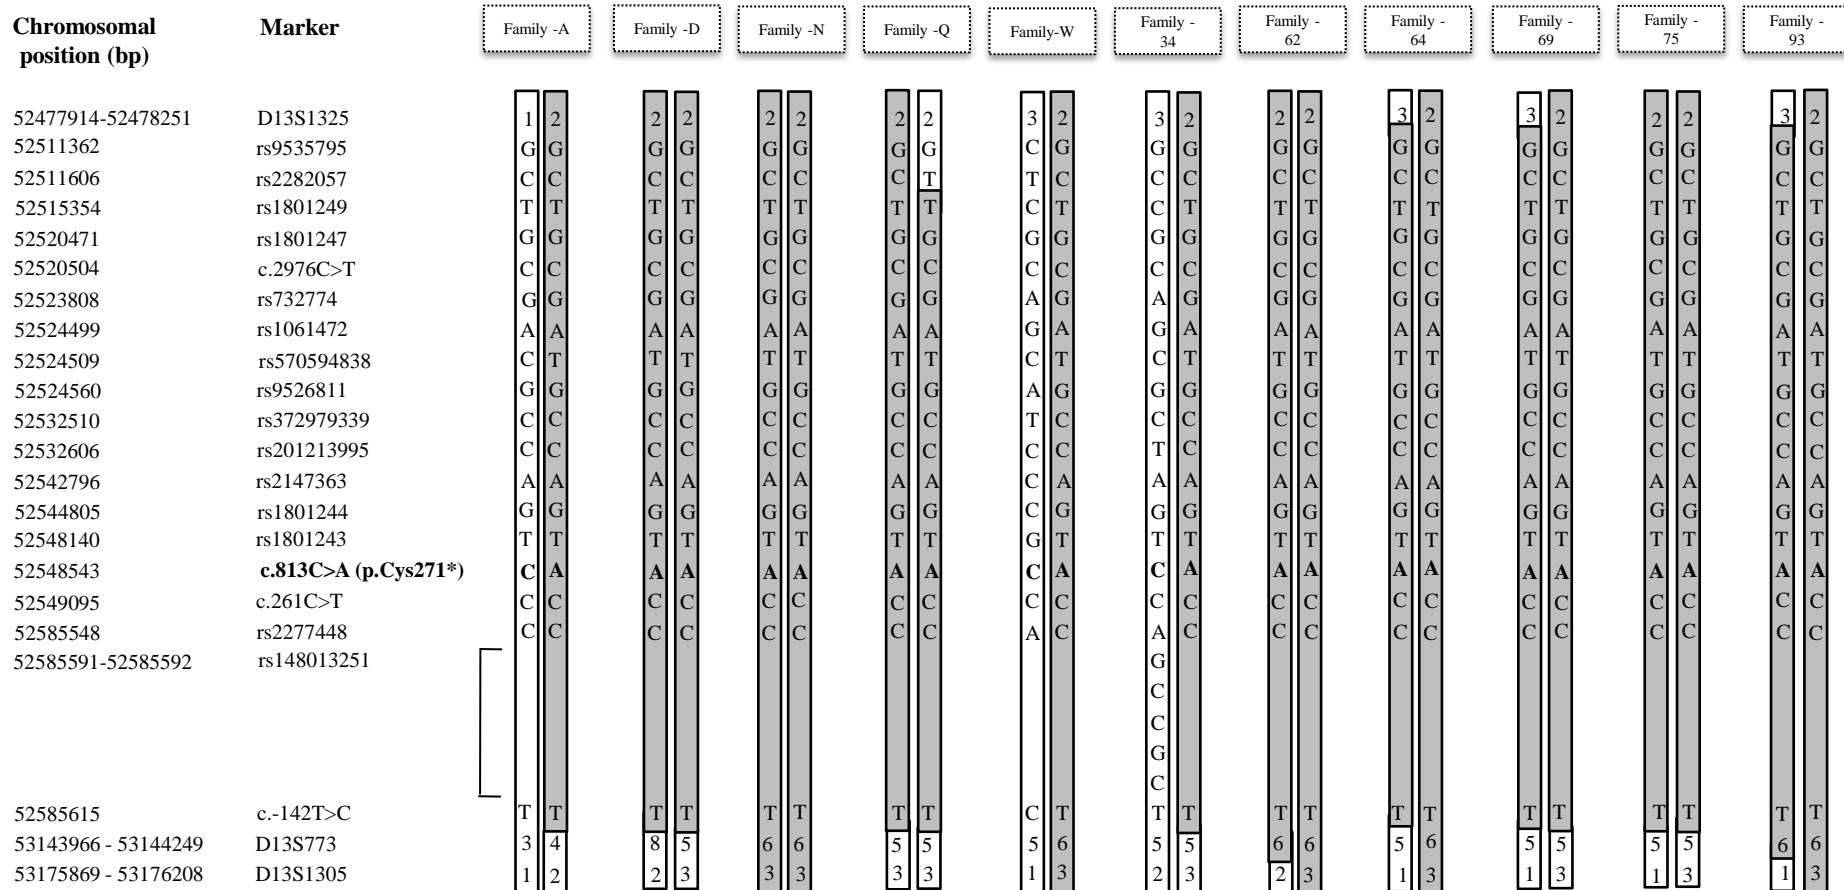

**Fig C. The haplotype analysis to show the founder effect for the c.813C>A (p.Cys271\*) mutation in 11 families.** The disease haplotype is colored in grey, and corresponds to 70.2 Kb-698.2 Kb of DNA. Bracket denotes the insertion of 5'GCCGC3' nucleotides between the SNPs rs2277448 and c.-142T>C.

**Chromosomal position (bp)**

**Marker**

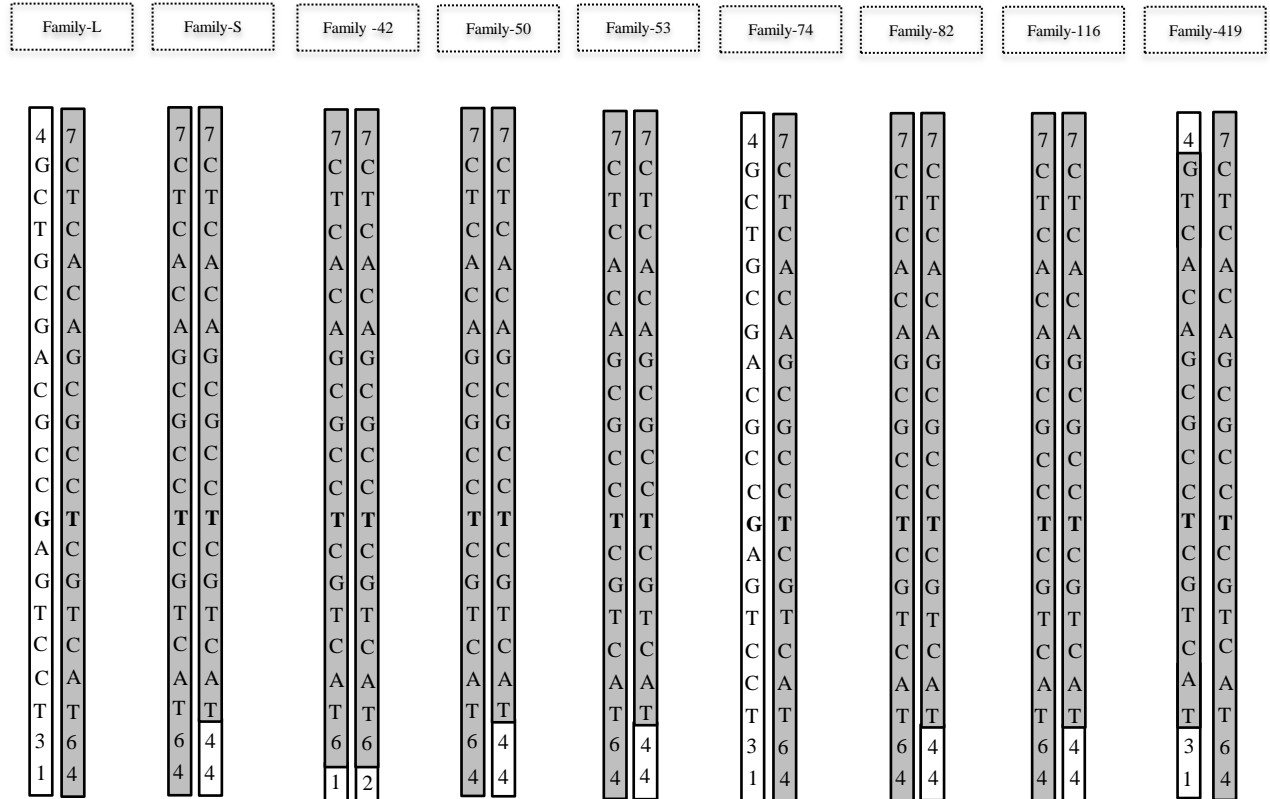

**Fig D. The haplotype analysis to show the founder effect for the c.2131G>T (p.Gly711Trp) mutation in nine families. The disease haplotype is colored in grey, and corresponds to 74.2 Kb-698.2 Kb of DNA.**

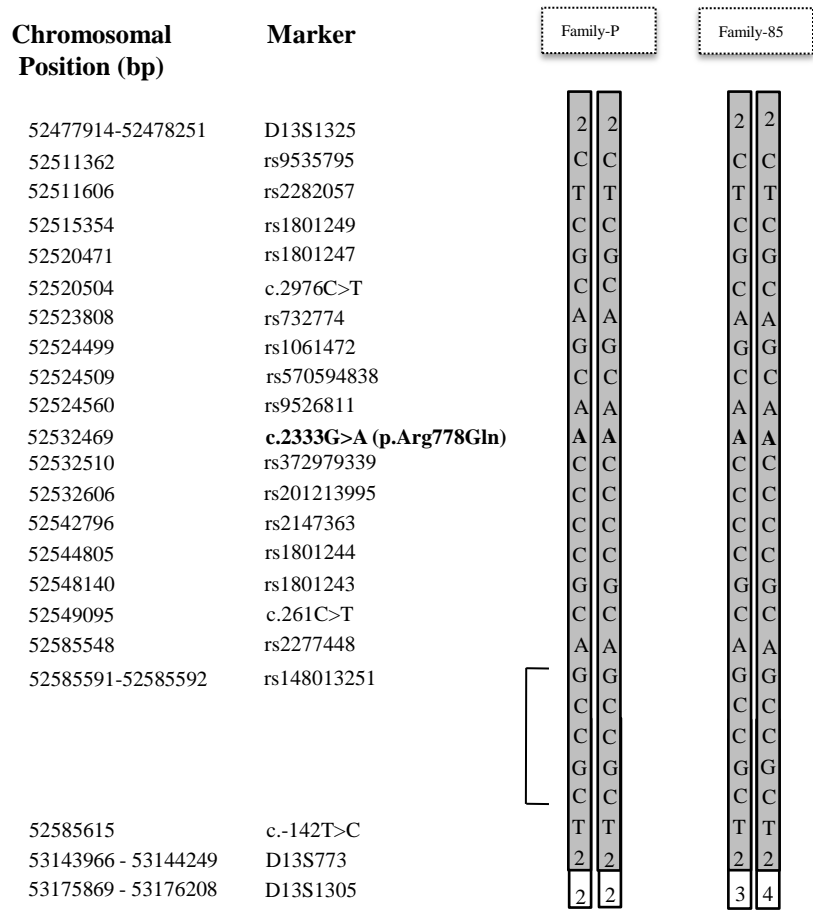

**Fig E. The haplotype analysis to show the founder effect for the c.2333G>A (p.Arg778Gln) mutation in family-P and family-85.** The disease haplotype is colored in grey, and corresponds to 666.3 Kb of DNA. Bracket denotes the insertion of 5'GCCGC3' nucleotides between the SNPs rs2277448 and c.-142T>C.

| Chromosomal<br>Position (bp) | Marker                             | Family-46 |   | Family-118 |   |
|------------------------------|------------------------------------|-----------|---|------------|---|
|                              |                                    |           |   |            |   |
| 52477914-52478251            | D13S1325                           | 2         | 2 | 2          | 2 |
| 52511362                     | rs9535795                          | G         | G | G          | G |
| 52511606                     | rs2282057                          | C         | C | C          | C |
| 52515354                     | rs1801249                          | T         | T | T          | T |
| 52520471                     | rs1801247                          | G         | G | G          | G |
| 52520482                     | <b>c.2998G&gt;A (p.Gly1000Arg)</b> | A         | A | A          | A |
| 52520504                     | c.2976C>T                          | C         | C | C          | C |
| 52523808                     | rs732774                           | G         | G | G          | G |
| 52524499                     | rs1061472                          | A         | A | A          | A |
| 52524509                     | rs570594838                        | C         | C | C          | C |
| 52524560                     | rs9526811                          | G         | G | G          | G |
| 52532510                     | rs372979339                        | C         | C | C          | C |
| 52532606                     | rs201213995                        | C         | C | C          | C |
| 52542796                     | rs2147363                          | A         | A | C          | C |
| 52544805                     | rs1801244                          | G         | G | G          | G |
| 52548140                     | rs1801243                          | T         | T | T          | T |
| 52549095                     | c.261C>T                           | C         | C | C          | C |
| 52585548                     | rs2277448                          | C         | C | C          | C |
| 52585615                     | c.-142T>C                          | T         | T | T          | T |
| 53143966 - 53144249          | D13S773                            | 3         | 3 | 3          | 3 |
| 53175869 - 53176208          | D13S1305                           | 2         | 4 | 2          | 4 |

**Fig F. The haplotype analysis to show the founder effect for the c.2998G>A (p.Gly1000Arg) mutation in family-46 and family-118.** The disease haplotype is colored in grey, and corresponds to 54.6 Kb of DNA.



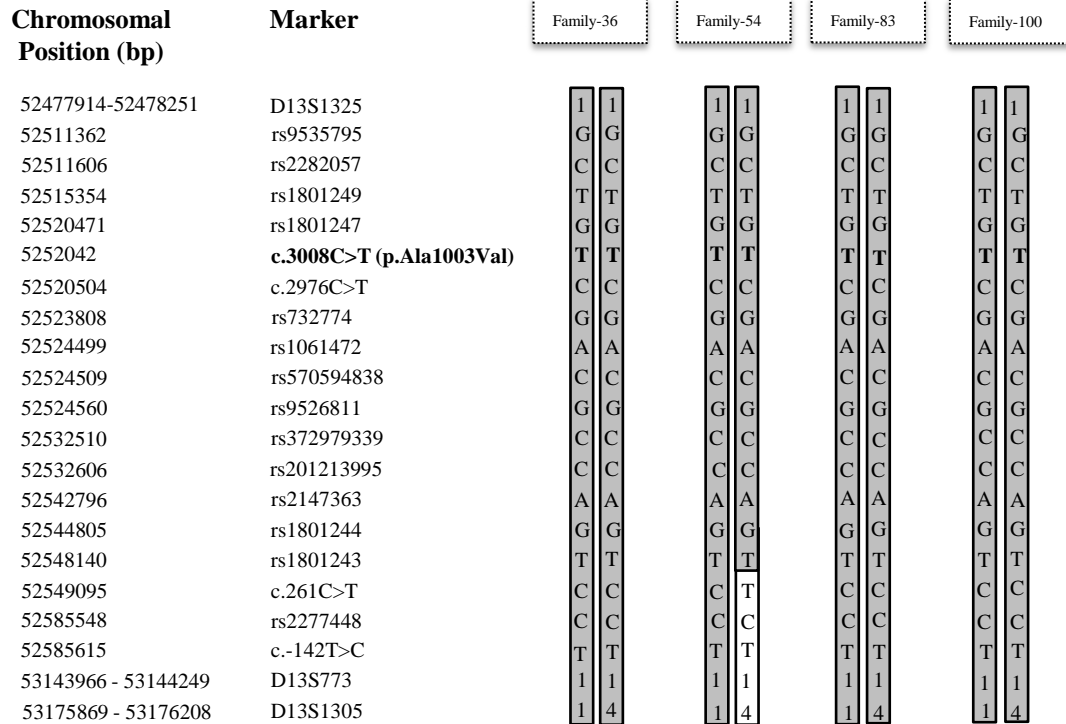

**Fig G. The haplotype analysis to show the founder effect for the c.3008C>T (p.Ala1003Val) mutation in four families.** The disease haplotype is colored in grey, and corresponds to 70.2 Kb-698.2 Kb of DNA.

**Chromosomal position (bp)**

**Marker**

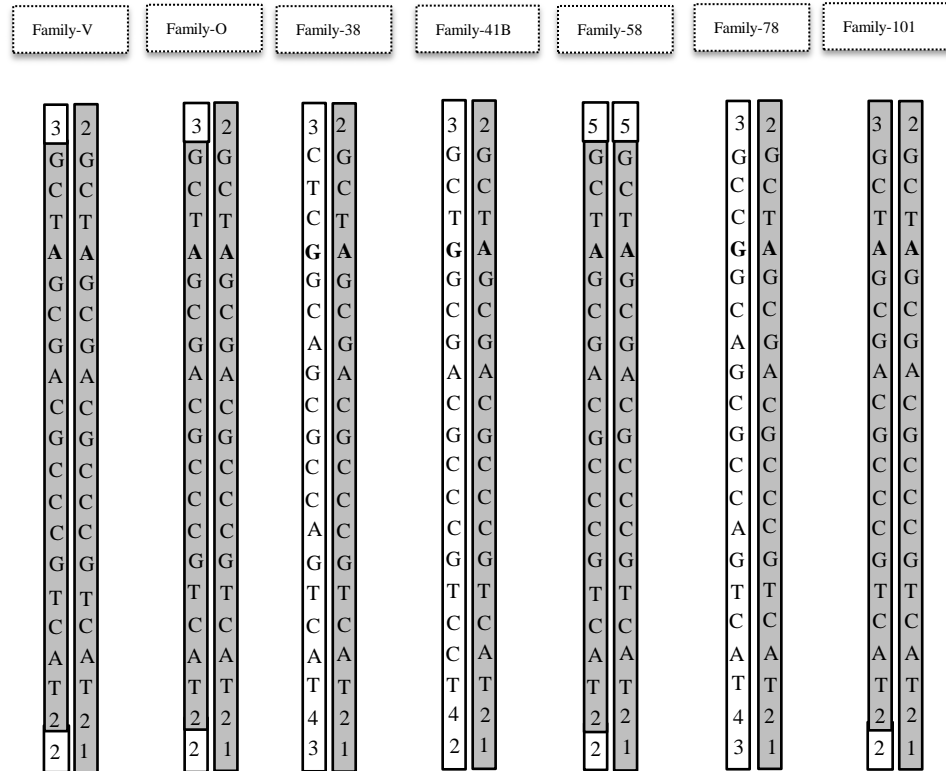

**Fig H. The haplotype analysis to show the founder effect for the c.3182G>A (p.Gly1061Glu) mutation in seven families.** The disease haplotype is colored in grey, and corresponds to 632.8 Kb-698.2 Kb of DNA.

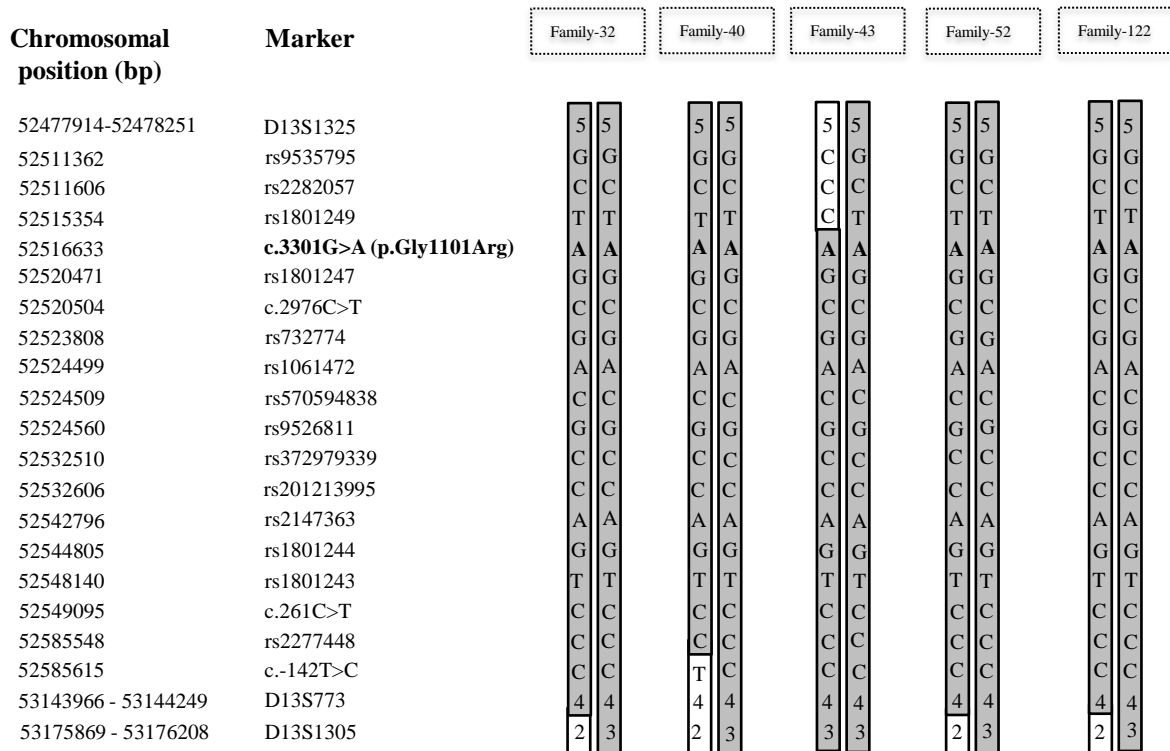

**Fig I. The haplotype analysis to show the founder effect for the c.3301G>A (p.Gly1101Arg) mutation in five families.** The disease haplotype is colored in grey, and corresponds to 107.6 Kb-698.2 Kb of DNA.

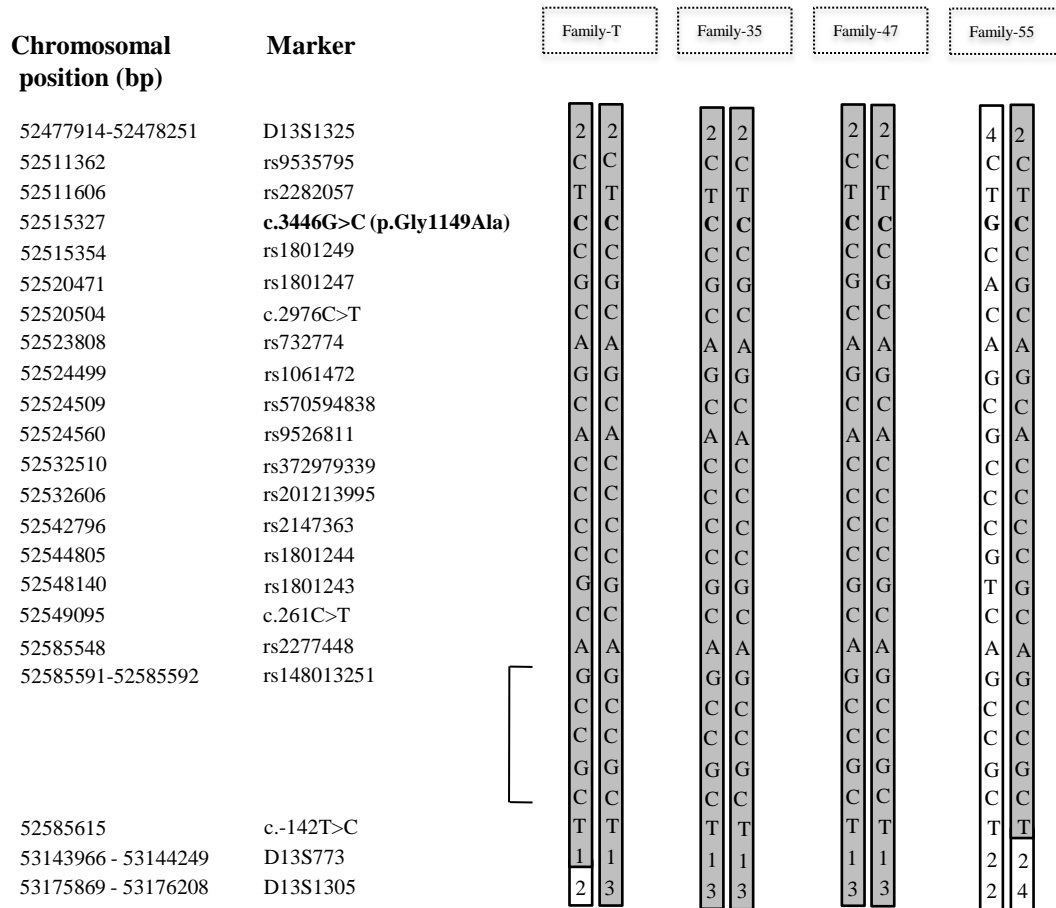

**Fig J. The haplotype analysis to show the founder effect for the c.3446G>C (p.Gly1149Ala) mutation in four families.** The disease haplotype is colored in grey, and corresponds to 107.7 Kb-698.2 Kb of DNA. Bracket denotes the insertion of 5'GCCGC3' nucleotides between the SNPs rs2277448 and c.-142T>C.

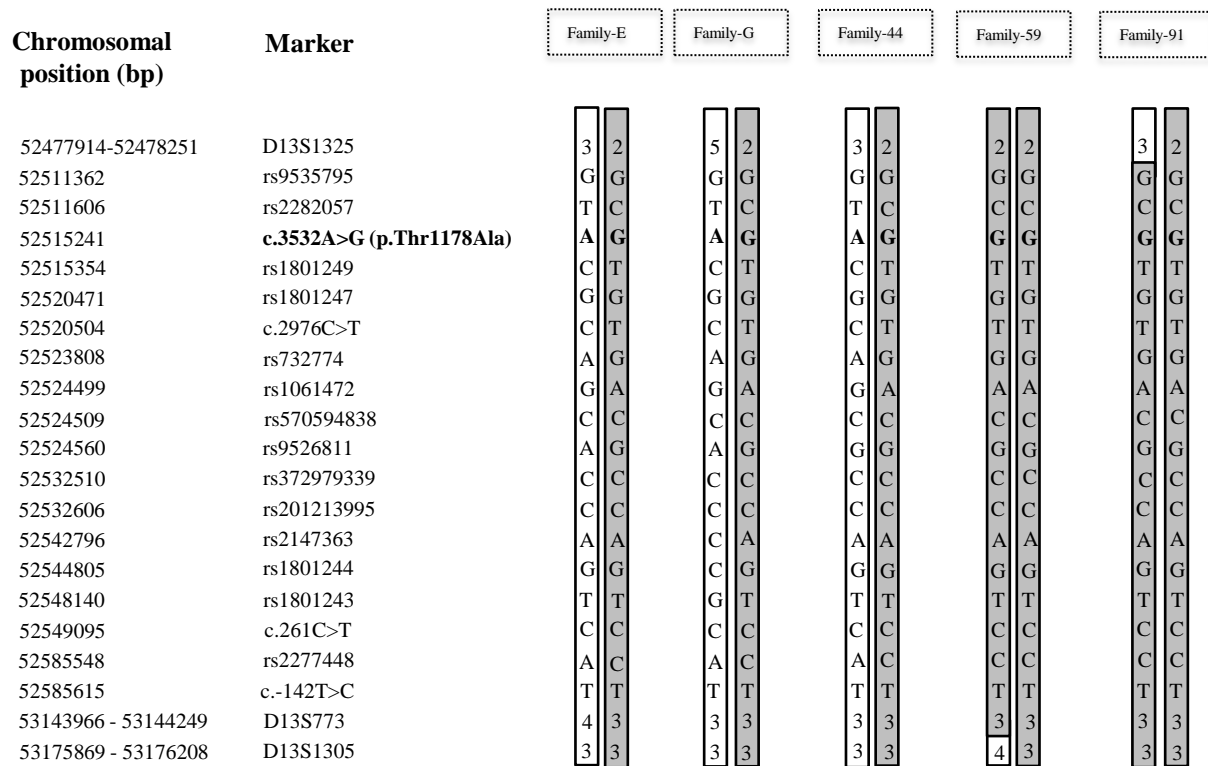

**Fig K. The haplotype analysis to show the founder effect for the c.3532A>G (p.Thr1178Ala) mutation in five families.** The disease haplotype is colored in grey, and corresponds to 664.8 Kb-698.2 Kb of DNA.

| Chromosomal position (bp) | Marker                             | Family-B |          | Family-90 |          |
|---------------------------|------------------------------------|----------|----------|-----------|----------|
|                           |                                    | 3        | 4        | 3         | 4        |
| 52477914-52478251         | D13S1325                           | 3        | 4        | 3         | 4        |
| 52511362                  | rs9535795                          | G        | G        | G         | G        |
| 52511606                  | rs2282057                          | C        | C        | C         | C        |
| 52511774                  | <b>c.3741C&gt;G (p.His1247Gln)</b> | <b>C</b> | <b>G</b> | <b>G</b>  | <b>G</b> |
| 52515354                  | rs1801249                          | T        | T        | T         | T        |
| 52520471                  | rs1801247                          | G        | G        | G         | G        |
| 52520504                  | c.2976C>T                          | C        | C        | C         | C        |
| 52523808                  | rs732774                           | G        | G        | G         | G        |
| 52524499                  | rs1061472                          | A        | A        | A         | A        |
| 52524509                  | rs570594838                        | C        | C        | C         | C        |
| 52524560                  | rs9526811                          | G        | G        | G         | G        |
| 52532510                  | rs372979339                        | C        | C        | C         | C        |
| 52532606                  | rs201213995                        | C        | C        | C         | C        |
| 52542796                  | rs2147363                          | C        | A        | A         | A        |
| 52544805                  | rs1801244                          | G        | G        | G         | G        |
| 52548140                  | rs1801243                          | T        | T        | T         | T        |
| 52549095                  | c.261C>T                           | C        | C        | C         | C        |
| 52585548                  | rs2277448                          | A        | C        | C         | C        |
| 52585615                  | c.-142T>C                          | T        | T        | T         | T        |
| 53143966 - 53144249       | D13S773                            | 1        | 1        | 1         | 1        |
| 53175869 - 53176208       | D13S1305                           | 2        | 3        | 2         | 3        |

**Fig L. The haplotype analysis to show the founder effect for the c.3741C>G (p.His1247Gln) mutation in family-B and family-90.** The disease haplotype is colored in grey, and corresponds to 698.2 Kb of DNA.

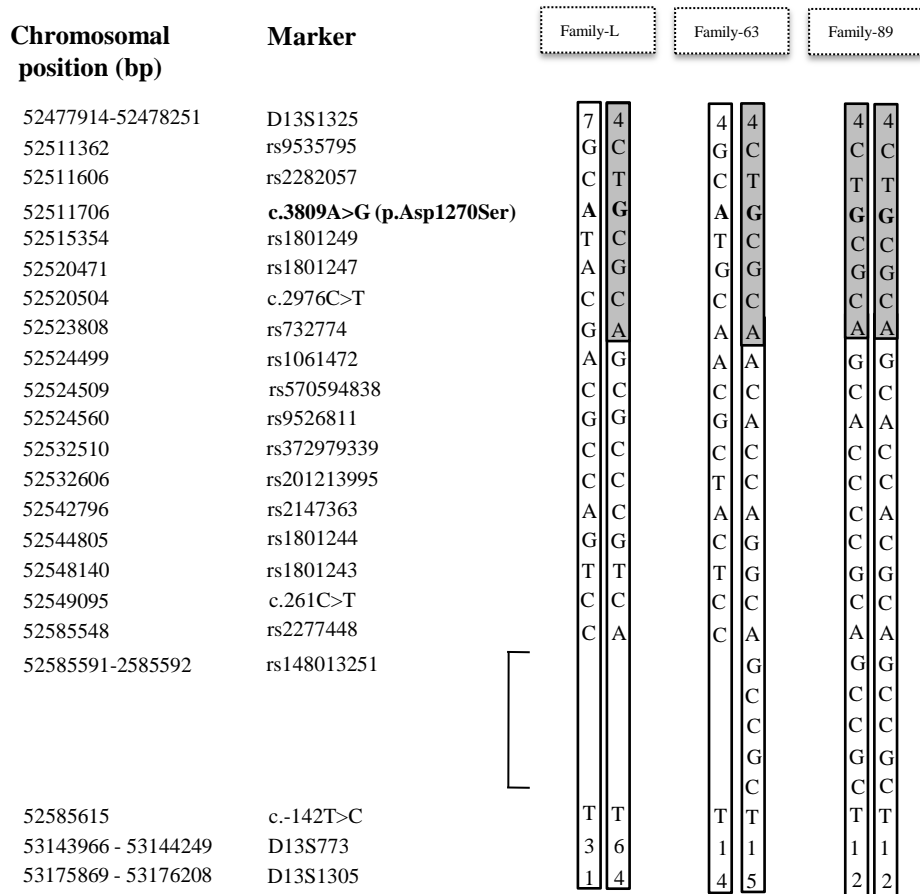

**Fig M. The haplotype analysis to show the founder effect for the c.3809A>G (p.Asp1270Ser) mutation in three families.** The disease haplotype is colored in grey, and corresponds to 45.8 Kb of DNA. Bracket denotes the insertion of 5'GCCGC3' nucleotides between the SNPs rs2277448 and c.-142T>C.

**Chromosomal position (bp)**

**Marker**

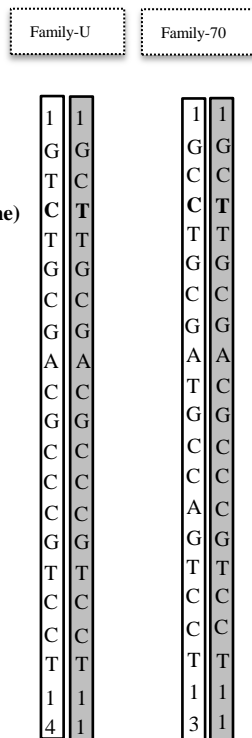

**Fig N. The haplotype analysis to show the founder effect for the c.3895C>T (p.Leu1299Phe) mutation in family-U and family-70.** The disease haplotype is colored in grey, and corresponds to 698.2 Kb of DNA.



**Chromosomal  
position (bp)**

**Marker**

|                     |                                    | Family-K | Family-Y | Family-57 |
|---------------------|------------------------------------|----------|----------|-----------|
| 52477914-52478251   | D13S1325                           | 1        | 2        | 2         |
| 52511362            | rs9535795                          | C        | G        | C         |
| 52511412            | <b>c.4021G&gt;A (p.Gly1341Ser)</b> | A        | A        | G         |
| 52511606            | rs2282057                          | T        | C        | T         |
| 52515354            | rs1801249                          | C        | T        | C         |
| 52520471            | rs1801247                          | G        | G        | G         |
| 52520504            | c.2976C>T                          | C        | C        | C         |
| 52523808            | rs732774                           | A        | G        | A         |
| 52524499            | rs1061472                          | G        | A        | G         |
| 52524509            | rs570594838                        | C        | C        | C         |
| 52524560            | rs9526811                          | A        | G        | G         |
| 52532510            | rs372979339                        | C        | C        | C         |
| 52532606            | rs201213995                        | C        | C        | C         |
| 52542796            | rs2147363                          | C        | A        | A         |
| 52544805            | rs1801244                          | C        | G        | G         |
| 52548140            | rs1801243                          | G        | T        | T         |
| 52549095            | c.261C>T                           | C        | C        | C         |
| 52585548            | rs2277448                          | A        | A        | A         |
| 52585591-52585592   | rs148013251                        | G        | G        |           |
|                     |                                    | C        | C        |           |
|                     |                                    | C        | C        |           |
|                     |                                    | G        | G        |           |
|                     |                                    | C        | C        |           |
| 52585615            | c.-142T>C                          | T        | T        | T         |
| 53143966 - 53144249 | D13S773                            | 2        | 4        | 5         |
| 53175869 - 53176208 | D13S1305                           | 3        | 3        | 3         |

**Fig O. The haplotype analysis to show the founder effect for the c.4021G>A (p.Gly1341Ser) mutation in three families.** The disease haplotype is colored in grey, and corresponds to 107.6 Kb of DNA. Bracket denotes the insertion of 5'GCCGC3' nucleotides between the SNPs rs2277448 and c.-142T>C.

**Table A.** Clinical features of Wilson disease patients.

| Sl.# | Family name | Affected individual | Age(yr)/Sex | Age at onset (yr) | Serum copper (Normal range: 75-160mcg/dL) | Serum ceruloplasmin (Normal range:15-35mg/dL) | 24 hr Urinary protein (Normal range: 20-40 mcg/24hrs) | KF ring | Jaundice (history) | Hepatomegaly |
|------|-------------|---------------------|-------------|-------------------|-------------------------------------------|-----------------------------------------------|-------------------------------------------------------|---------|--------------------|--------------|
| 1    | Family-A    | II-2                | 22/F        | 16                | 36                                        | 3                                             | 210                                                   | +       | -                  | +            |
| 2    | Family-D    | II-1                | 29/M        | 6                 | 81                                        | 1                                             | 90                                                    | +       | +                  | +            |
| 3    | Family-W    | II-1                | 16/F        | 13.5              | 37                                        | 1                                             | 69                                                    | +       | +                  | -            |
| 4    | Family-N    | IV-3                | 19/F        | 14                | 28                                        | 2                                             | 90                                                    | +       | -                  | -            |
| 5    | Family-Q    | IV-3                | 14/M        | 11                | 10                                        | 4                                             | 72                                                    | +       | +                  | +            |
| 6    | Family-34   | IV-6                | 30/F        | 20                | 80                                        | 4.5                                           | 354                                                   | +       | -                  | NA           |
| 7    | Family-62   | IV-3                | 11/F        | 9                 | 16                                        | 2                                             | 120                                                   | +       | +                  | +            |
| 8    | Family-64   | II-2                | 14/M        | 14                | NA                                        | NA                                            | NA                                                    | +       | +                  | +            |
| 9    | Family-69   | II-1                | 11/F        | 9                 | 16                                        | 5                                             | 69                                                    | +       | +                  | +            |
| 10   | Family-75   | IV-1                | 17/F        | 12                | 30                                        | 2                                             | 150                                                   | -       | -                  | -            |
| 11   | Family-93   | IV-3                | 38/F        | 9                 | 38                                        | 2.7                                           | 162                                                   | +       | -                  | -            |
| 12   | Family-419  | IV-2                | 18/F        | 11                | 21                                        | 4                                             | 726                                                   | +       | -                  | -            |
| 13   | Family-L    | II-1                | 19/M        | 11                | 42                                        | 4                                             | 520                                                   | +       | -                  | +            |
| 14   | Family-S    | III-3               | 36/M        | 12                | 31                                        | 4                                             | 258                                                   | +       | +                  | -            |

|    |            |      |      |              |    |     |     |   |    |    |
|----|------------|------|------|--------------|----|-----|-----|---|----|----|
| 15 | Family-82  | IV-1 | 3/M  | 8            | 22 | 4   | 510 | + | +  | +  |
| 16 | Family-116 | V-4  | 8/F  | Asymptomatic | 14 | 10  | 200 | + | +  | +  |
| 17 | Family-42  | IV-6 | 21/M | 24           | 14 | 2   | 116 | + | NA | NA |
| 18 | Family-50  | II-5 | 19/M | 9            | 30 | 3   | 336 | + | +  | +  |
| 19 | Family-53  | IV-2 | 18/F | 8            | NA | 7   | 560 | + | +  | NA |
| 20 | Family-74  | II-2 | 15/M | 11           | 42 | 4   | 95  | + | -  | -  |
| 21 | Family-V   | IV-2 | 17/M | 13           | 22 | 4   | 519 | + | -  | -  |
| 22 | Family-O   | II-1 | 14/F | 11           | 14 | 4   | 613 | + | -  | -  |
| 23 | Family-38  | II-2 | 12/M | 12           | 74 | 8   | 45  | + | NA | NA |
| 24 | Family-58  | II-2 | 30/M | 12           | 27 | 4   | 451 | + | NA | NA |
| 25 | Family-78  | II-1 | 28/M | 13           | 13 | 0.6 | 120 | + | NA | NA |
| 26 | Family-41B | II-1 | 25/M | 23           | 40 | 3   | 897 | + | NA | NA |
| 27 | Family-K   | IV-1 | 21/F | 9            | 31 | 10  | 600 | + | -  | -  |
| 28 | Family-Y   | II-1 | 33/M | 8            | 20 | 4   | 810 | + | +  | -  |
| 29 | Family-57  | II-1 | 16/M | 14           | NA | NA  | NA  | + | NA | NA |
| 30 | Family-E   | II-2 | 28/M | 23           | 56 | 5   | 586 | + | -  | -  |
| 31 | Family-G   | II-1 | 33/M | 22           | 28 | 4   | 224 | + | -  | -  |
| 32 | Family-59  | IV-2 | 9/F  | 7            | 62 | 7   | 513 | + | NA | NA |

|    |            |      |      |    |    |     |     |    |    |    |
|----|------------|------|------|----|----|-----|-----|----|----|----|
| 33 | Family-59  | IV-3 | 2/M  | NA | NA | NA  | NA  | NA | NA | NA |
| 34 | Family-91  | IV-5 | 35/M | 29 | 55 | 4   | 27  | +  | NA | NA |
| 35 | Family-P   | II-1 | 18/F | 15 | 51 | 5   | 352 | +  | +  | -  |
| 36 | Family-85  | IV-2 | 35/M | 19 | 16 | 8   | 578 | +  | -  | -  |
| 37 | Family-T   | IV-6 | 23/M | 11 | 18 | 2   | 343 | +  | -  | -  |
| 38 | Family-35  | II-5 | 19/M | 16 | 50 | 16  | 240 | +  | NA | -  |
| 39 | Family-35  | II-6 | 14/F | 6  | 14 | 1   | 36  | +  | NA | -  |
| 40 | Family-47  | IV-6 | 8/M  | 8  | 31 | 5   | 312 | +  | NA | NA |
| 41 | Family-55  | II-1 | 13/F | 11 | 60 | 8.6 | 6.2 | +  | NA | NA |
| 42 | Family-U   | IV-2 | 36/M | 28 | 43 | 4   | NA  | +  | +  | -  |
| 43 | Family-70  | II-6 | 35/F | 31 | 20 | 2   | 200 | +  | -  | -  |
| 44 | Family-83  | IV-1 | 23/F | 17 | 24 | 6   | 195 | +  | +  | -  |
| 45 | Family-36  | IV-3 | 30/M | 16 | 11 | 4   | 299 | +  | -  | -  |
| 46 | Family-54  | IV-4 | 28/F | 24 | 50 | 18  | 62  | +  | -  | -  |
| 47 | Family-506 | II-1 | 14/M | 10 | 20 | 4   | 192 | +  | -  | -  |
| 48 | Family-128 | IV-5 | 31/F | 14 | NA | 6   | 52  | +  | -  | +  |
| 49 | Family-31  | II-3 | 14/M | 14 | 28 | 5   | 99  | +  | +  | -  |
| 50 | Family-31  | II-4 | 12/M | 12 | 36 | 5   | NA  | +  | -  | -  |

|    |           |      |      |    |    |    |     |   |    |    |
|----|-----------|------|------|----|----|----|-----|---|----|----|
| 51 | Family-B  | II-3 | 23/M | 15 | 50 | 2  | NA  | + | -  | -  |
| 52 | Family-C  | II-3 | 32/M | 10 | 51 | 3  | 515 | + | -  | -  |
| 53 | Family-M  | II-1 | 12/M | 7  | 30 | 4  | 66  | + | +  | -  |
| 54 | Family-80 | IV-1 | 19/F | 11 | NA | NA | NA  | + | -  | -  |
| 55 | Family-32 | V-5  | 12/M | 10 | 16 | 4  | 444 | + | -  | -  |
| 56 | Family-40 | II-2 | 16/M | 9  | 13 | 5  | 247 | + | +  | -  |
| 57 | Family-43 | IV-1 | 23/M | 10 | 64 | 4  | 543 | + | NA | NA |
| 58 | Family-52 | IV-2 | 11/M | 9  | 25 | 5  | 102 | + | NA | +  |
| 59 | Family-46 | II-1 | 46/M | 39 | 42 | 9  | 884 | + | NA | NA |
| 60 | Family-49 | IV-1 | 19/M | 17 | 18 | 2  | 300 | + | +  | -  |
| 61 | Family-56 | II-2 | 33/M | 10 | 52 | 9  | 630 | + | -  | NA |
| 62 | Family-60 | V-1  | 11/F | 10 | 28 | 6  | 72  | + | -  | -  |
| 63 | Family-63 | II-3 | 31/F | 19 | 24 | 3  | 220 | + | -  | -  |
| 64 | Family-89 | II-5 | 24/F | 9  | 40 | 3  | 915 | + | -  | -  |
| 65 | Family-67 | II-1 | 29/M | 21 | 56 | 6  | 860 | + | NA | NA |
| 66 | Family-72 | IV-1 | 21/F | 20 | NA | NA | NA  | + | -  | NA |
| 67 | Family-72 | IV-2 | 20/F | 18 | 26 | 2  | 385 | + | -  | -  |
| 68 | Family-72 | IV-3 | 25/M | 24 | 40 | 4  | 190 | + | -  | -  |
| 69 | Family-76 | IV-2 | 24/M | 11 | 27 | 5  | 175 | + | +  | -  |

|    |            |      |       |      |    |     |      |    |    |    |
|----|------------|------|-------|------|----|-----|------|----|----|----|
| 70 | Family-77  | II-2 | 14/M  | 10   | NA | NA  | NA   | +  | NA | NA |
| 71 | Family-90  | IV-1 | 14/M  | 12.9 | 30 | 5   | 130  | +  | +  | NA |
| 72 | Family-86  | II-2 | 9/F   | 9    | 38 | 6   | 898  | +  | -  | -  |
| 73 | Family-98  | II-2 | 14/M  | 10   | 67 | 3.5 | 209  | +  | NA | -  |
| 74 | Family-100 | IV-3 | 15/M  | 16   | 46 | 7   | 240  | +  | NA | NA |
| 75 | Family-101 | IV-2 | NA /M | 12   | 42 | 5   | 445  | +  | NA | NA |
| 76 | Family-101 | IV-3 | NA /M | 12   | 30 | 5   | 380  | +  | +  | +  |
| 77 | Family-118 | IV-4 | 55/F  | 30   | 86 | 8   | 2280 | +  | NA | NA |
| 78 | Family-121 | II-1 | 14/F  | 12   | 30 | 5   | 296  | +  | -  | -  |
| 79 | Family-122 | IV-2 | 11/F  | 9    | 92 | 6   | 11   | +  | NA | NA |
| 80 | Family-122 | IV-4 | 8/F   | 8    | 44 | 4   | 647  | +  | NA | NA |
| 81 | Family-123 | II-2 | 15/F  | 15   | 28 | 6   | 318  | +  | -  | -  |
| 82 | Family-73  | IV-2 | 22/F  | 12.6 | 76 | 26  | 279  | +  | -  | -  |
| 83 | Family-44  | IV-4 | NA/M  | NA   | NA | NA  | NA   | NA | NA | NA |
| 84 | Family-28  | IV-I | 41/M  | 10   | 27 | 3   | 175  | +  | +  | -  |
| 85 | Family-F   | V-2  | 31/F  | 18   | 24 | 1   | 515  | +  | -  | -  |
| 86 | Family-H   | II-1 | 27/M  | 20   | 40 | 2   | 689  | +  | -  | -  |
| 87 | Family-I   | IV-I | 38/M  | 17   | 27 | 3   | 170  | +  | -  | -  |
| 88 | Family-X   | II-5 | 15/F  | 11   | 75 | 2   | 91   | +  | +  | -  |

|     |            |      |      |              |     |    |      |   |   |    |
|-----|------------|------|------|--------------|-----|----|------|---|---|----|
| 89  | Family-R   | IV-I | 27/M | 19           | 20  | 4  | 188  | + | - | -  |
| 90  | Family-45  | V-1  | 17/M | asymptomatic | 3   | 8  | 1040 | - | + | -  |
| 91  | Family-45  | V-2  | 14/M | 14           | 124 | 9  | 1215 | + | - | -  |
| 92  | Family-33  | II-2 | 30/M | 23           | 76  | 20 | 504  | - | + | -  |
| 93  | Family-41  | II-5 | 31/M | 12           | 42  | 6  | 135  | + | - | -  |
| 94  | Family-51  | IV-2 | 25/M | 20           | 5   | 13 | 347  | + | - | -  |
| 95  | Family-84  | II-1 | 15/F | 7            | 113 | 28 | 514  | + | + | -  |
| 96  | Family-84  | II-2 | 18/M | 16           | NA  | NA | NA   | + | - | -  |
| 97  | Family-84  | II-3 | 17/M | 17           | NA  | 22 | 639  | + | - | -  |
| 98  | Family-120 | II-2 | 24/M | 12           | 37  | 6  | 291  | + | - | -  |
| 99  | Family-65  | II-1 | 13/M | 12           | 1   | 19 | 217  | + | - | -  |
| 100 | Family-71  | II-2 | 11/M | 11           | 57  | 13 | 349  | - | - | -  |
| 101 | Family-112 | II-3 | 15/M | 12           | 36  | 5  | 507  | + | - | -  |
| 102 | Family-94  | II-4 | 32/M | 15           | 12  | 2  | 380  | + | - | -  |
| 103 | Family-66  | IV-4 | 25/F | 24           | 68  | 3  | 638  | + | - | -  |
| 104 | Family-79  | IV-3 | 27/M | 17           | 103 | 18 | 150  | + | - | -  |
| 105 | Family-81  | IV-2 | 20/M | 13           | 32  | 4  | NA   | + | - | -  |
| 106 | Family-87  | II-6 | 18/F | 15           | 44  | 3  | NA   | + | - | NA |
| 107 | Family-88  | II-2 | 19/M | 14           | 6   | 2  | 110  | + | - | -  |
| 108 | Family-92  | II-1 | 32/M | 11           | 37  | 5  | 312  | + | - | -  |

|     |            |       |      |    |    |    |     |   |   |   |
|-----|------------|-------|------|----|----|----|-----|---|---|---|
| 109 | Family-95  | IV-1  | 25/M | 24 | 34 | 5  | 145 | + | - | - |
| 110 | Family-96  | IV-2  | 26/F | 25 |    | 0  | 370 | + | - |   |
| 111 | Family-97  | III-2 | 25/M | 12 | 76 | 14 | 332 | + | - | - |
| 112 | Family-97  | III-4 | 35/M | 30 | 54 | 4  | 348 | + | - | - |
| 113 | Family-107 | II-2  | 22/F | 13 | 76 | 26 | 279 | + | - | - |

| Sl.# | Family name | Affected individual | Splenomegaly | Dysphagia | Dysarthria | Tremor | Dystonia | Writing difficulty | Chorea | Athetosis |
|------|-------------|---------------------|--------------|-----------|------------|--------|----------|--------------------|--------|-----------|
| 1    | Family-A    | II-2                | -            | +         | +          | +      | +        | +                  | -      | -         |
| 2    | Family-D    | II-1                | +            | -         | +          | -      | +        | +                  | -      | -         |
| 3    | Family-W    | II-1                | +            | +         | +          | -      | +        | +                  | -      | -         |
| 4    | Family-N    | IV-3                | +            | -         | +          | -      | +        | +                  | -      | -         |
| 5    | Family-Q    | IV-3                | +            | -         | +          | -      | +        | +                  | -      | -         |
| 6    | Family-34   | IV-6                | +            | +         | +          | +      | +        | +                  | NA     | NA        |
| 7    | Family-62   | IV-3                | +            | +         | +          | +      | NA       | +                  | -      | -         |
| 8    | Family-64   | II-2                | +            | +         | +          | -      | +        | +                  | -      | -         |
| 9    | Family-69   | II-1                | +            | +         | +          | -      | +        | +                  | -      | -         |
| 10   | Family-75   | IV-1                | +            | +         | +          | -      | +        | +                  | -      | -         |
| 11   | Family-93   | IV-3                | -            | +         | +          | +      | +        | +                  | +      | +         |
| 12   | Family-419  | IV-2                | -            | -         | +          | +      | -        | -                  | -      | -         |



|    |            |       |    |   |   |   |   |   |   |   |
|----|------------|-------|----|---|---|---|---|---|---|---|
| 13 | Family-L   | II-1  | +  | - | + | + | + | + | + | - |
| 14 | Family-S   | III-3 | +  | - | - | + | + | + | - | - |
| 15 | Family-82  | IV-1  | -  | - | - | - | - | - | - | - |
| 16 | Family-116 | V-4   | +  | - | - | - | - | - | - | - |
| 17 | Family-42  | IV-6  | NA | - | - | - | - | - | - | - |
| 18 | Family-50  | II-5  | +  | + | + | - | + | + | - | - |
| 19 | Family-53  | IV-2  | NA | + | + | - | - | + | + | - |
| 20 | Family-74  | II-2  | +  | - | + | - | + | + | - | - |
| 21 | Family-V   | IV-2  | -  | + | + | - | - | + | - | - |
| 22 | Family-O   | II-1  | -  | + | + | - | + | + | + | - |
| 23 | Family-38  | II-2  | NA | + | + | + | + | + | - | - |
| 24 | Family-58  | II-2  | NA | + | + | + | + | + | - | - |
| 25 | Family-78  | II-1  | NA | - | + | + | - | + | + | + |
| 26 | Family-41B | II-1  | NA | - | + | + | - | - | - | - |
| 27 | Family-K   | IV-1  | -  | - | + | + | + | + | - | - |
| 28 | Family-Y   | II-1  | +  | + | + | - | + | + | - | - |
| 29 | Family-57  | II-1  | NA | - | + | + | + | + | - | - |
| 30 | Family-E   | II-2  | -  | - | + | + | + | + | - | - |
| 31 | Family-G   | II-1  | -  | - | + | - | - | - | - | - |
| 32 | Family-59  | IV-2  | NA | - | - | - | - | - | - | - |

|    |            |      |    |    |    |    |    |    |    |    |
|----|------------|------|----|----|----|----|----|----|----|----|
| 33 | Family-59  | IV-3 | NA | NA | NA | NA | NA | NA | NA | NA |
| 34 | Family-91  | IV-5 | NA | -  | +  | +  | -  | -  | -  | -  |
| 35 | Family-P   | II-1 | -  | -  | +  | -  | -  | +  | -  | -  |
| 36 | Family-85  | IV-2 | -  | -  | +  | +  | -  | -  | -  | -  |
| 37 | Family-T   | IV-6 | -  | +  | +  | -  | +  | +  | -  | -  |
| 38 | Family-35  | II-5 | -  | +  | +  | +  | +  | +  | -  | -  |
| 39 | Family-35  | II-6 | -  | +  | +  | +  | +  | +  | -  | -  |
| 40 | Family-47  | IV-6 | NA | +  | +  | -  | -  | +  | -  | -  |
| 41 | Family-55  | II-1 | NA | +  | -  | +  | +  | +  | -  | -  |
| 42 | Family-U   | IV-2 | -  | +  | +  | +  | -  | +  | -  | -  |
| 43 | Family-70  | II-6 | -  | +  | +  | -  | -  | +  | -  | -  |
| 44 | Family-83  | IV-1 | -  | -  | -  | +  | -  | -  | -  | -  |
| 45 | Family-36  | IV-3 | -  | -  | -  | -  | -  | +  | -  | -  |
| 46 | Family-54  | IV-4 | -  | +  | +  | -  | +  | +  | -  | -  |
| 47 | Family-506 | II-1 | -  | +  | +  | -  | +  | +  | +  | +  |
| 48 | Family-128 | IV-5 | +  | -  | +  | +  | -  | +  | -  | -  |
| 49 | Family-31  | II-3 | -  | +  | +  | -  | +  | +  | -  | -  |
| 50 | Family-31  | II-4 | -  | +  | +  | -  | +  | +  | -  | -  |
| 51 | Family-B   | II-3 | +  | -  | +  | -  | +  | -  | -  | -  |
| 52 | Family-C   | II-3 | +  | -  | +  | -  | +  | +  | -  | -  |

|    |           |      |    |    |    |    |    |    |    |    |
|----|-----------|------|----|----|----|----|----|----|----|----|
| 53 | Family-M  | II-1 | -  | +  | +  | -  | +  | +  | -  | -  |
| 54 | Family-80 | IV-1 | -  | -  | +  | -  | +  | +  | -  | -  |
| 55 | Family-32 | V-5  | -  | -  | +  | -  | -  | -  | -  | -  |
| 56 | Family-40 | II-2 | -  | NA | NA | +  | +  | +  | +  | +  |
| 57 | Family-43 | IV-1 | NA | +  | +  | -  | +  | -  | +  | -  |
| 58 | Family-52 | IV-2 | -  | +  | +  | +  | +  | +  | -  | -  |
| 59 | Family-46 | II-1 | NA | -  | -  | +  | -  | +  | -  | -  |
| 60 | Family-49 | IV-1 | -  | +  | +  | +  | +  | +  | +  | -  |
| 61 | Family-56 | II-2 | -  | -  | +  | -  | -  | -  | -  | -  |
| 62 | Family-60 | V-1  | -  | -  | +  | -  | +  | +  | +  | -  |
| 63 | Family-63 | II-3 | -  | -  | -  | -  | -  | -  | -  | -  |
| 64 | Family-89 | II-5 | -  | +  | +  | -  | -  | +  | -  | -  |
| 65 | Family-67 | II-1 | NA | -  | -  | -  | -  | +  | -  | -  |
| 66 | Family-72 | IV-1 | NA | NA | NA | NA | NA | NA | NA | NA |
| 67 | Family-72 | IV-2 | -  | -  | +  | -  | +  | +  | -  | -  |
| 68 | Family-72 | IV-3 | -  | +  | +  | -  | -  | +  | +  | +  |
| 69 | Family-76 | IV-2 | -  | -  | +  | +  | -  | +  | -  | -  |
| 70 | Family-77 | II-2 | NA | NA | NA | NA | NA | NA | NA | NA |
| 71 | Family-90 | IV-1 | NA | +  | +  | +  | +  | +  | -  | -  |
| 72 | Family-86 | II-2 | NA | +  | +  | -  | +  | +  | -  | -  |

|    |            |      |    |    |    |    |    |    |    |    |
|----|------------|------|----|----|----|----|----|----|----|----|
| 73 | Family-98  | II-2 | +  | -  | +  | -  | +  | +  | +  | -  |
| 74 | Family-100 | IV-3 | NA | -  | -  | +  | -  | -  | +  | -  |
| 75 | Family-101 | IV-2 | NA | -  | +  | +  | +  | +  | -  | -  |
| 76 | Family-101 | IV-3 | -  | -  | +  | +  | +  | +  | -  | -  |
| 77 | Family-118 | IV-4 | NA | -  | +  | +  | -  | +  | -  | -  |
| 78 | Family-121 | II-1 | NA | +  | +  | +  | +  | +  | -  | -  |
| 79 | Family-122 | IV-2 | NA | +  | +  | +  | +  | +  | -  | -  |
| 80 | Family-122 | IV-4 | NA | -  | -  | -  | -  | -  | -  | -  |
| 81 | Family-123 | II-2 | -  | +  | +  | +  | +  | +  | -  | -  |
| 82 | Family-73  | IV-2 | -  | -  | +  | +  | -  | +  | -  | -  |
| 83 | Family-44  | IV-4 | NA | NA | NA | NA | NA | NA | NA | NA |
| 84 | Family-28  | IV-1 | -  | +  | +  | -  | +  | +  | -  | -  |
| 85 | Family-F   | V-2  | -  | -  | -  | +  | +  | +  | -  | -  |
| 86 | Family-H   | II-1 | -  | -  | -  | +  | -  | -  | -  | -  |
| 87 | Family-I   | IV-I | -  | -  | +  | +  | -  | +  | -  | -  |
| 88 | Family-X   | II-5 | +  | -  | +  | -  | +  | +  | -  | -  |
| 89 | Family-R   | IV-I | -  | +  | +  | -  | +  | +  | -  | -  |
| 90 | Family-45  | V-1  | -  | -  | -  | -  | -  | -  | -  | -  |
| 91 | Family-45  | V-2  | +  | -  | +  | +  | +  | +  | -  | -  |
| 92 | Family-33  | II-2 | -  | +  | +  | +  | +  | +  | -  | -  |

|     |            |       |   |   |   |   |   |   |   |   |
|-----|------------|-------|---|---|---|---|---|---|---|---|
| 93  | Family-41  | II-5  | - | + | + | + | + | + | - | - |
| 94  | Family-51  | IV-2  | - | + | + | - | - | + | - | - |
| 95  | Family-84  | II-1  | + | - | - | - | - | - | - | - |
| 96  | Family-84  | II-2  | - | - | - | - | - | - | - | - |
| 97  | Family-84  | II-3  | - | - | - | - | - | - | - | - |
| 98  | Family-120 | II-2  | + | + | + | + | + | + | - | - |
| 99  | Family-65  | II-1  | - | - | + | - | + | + | - | - |
| 100 | Family-71  | II-2  | - | - | - | - | - | - | - | - |
| 101 | Family-112 | II-3  | + | - | + | + | + | + | - | - |
| 102 | Family-94  | II-4  | - | - | + | - | - | - | - | - |
| 103 | Family-66  | IV-4  | - | - | + | + | + | - | - | - |
| 104 | Family-79  | IV-3  | - | + | + | + | - | + | - | - |
| 105 | Family-81  | IV-2  | - | - | + | + | + | + | - | - |
| 106 | Family-87  | II-6  | - | - | + | + | + | + | - | - |
| 107 | Family-88  | II-2  | - | - | + | - | - | + | - | - |
| 108 | Family-92  | II-1  | - | - | + | + | + | + | - | - |
| 109 | Family-95  | IV-1  | + | + | + | + | - | + | - | - |
| 110 | Family-96  | IV-2  | - | - | - | - | - | + | - | - |
| 111 | Family-97  | III-2 | + | - | + | + | + | + | - | - |
| 112 | Family-97  | III-4 | - | - | - | + | - | - | - | - |

|     |            |      |   |   |   |   |   |   |   |   |
|-----|------------|------|---|---|---|---|---|---|---|---|
| 113 | Family-107 | II-2 | - | - | + | + | - | + | - | - |
|-----|------------|------|---|---|---|---|---|---|---|---|

| Sl.# | Family name | Affected individual | Parkinsonism | Rigidity | Bradykinesia | Cerebral atrophy | Cerebellar atrophy | Brain stem atrophy | Gaint panda sign |
|------|-------------|---------------------|--------------|----------|--------------|------------------|--------------------|--------------------|------------------|
| 1    | Family-A    | II-2                | +            | NA       | +            | -                | -                  | -                  | -                |
| 2    | Family-D    | II-1                | +            | +        | +            | -                | -                  | -                  | -                |
| 3    | Family-W    | II-1                | +            | +        | +            | -                | -                  | -                  | -                |
| 4    | Family-N    | IV-3                | +            | +        | +            | -                | -                  | -                  | -                |
| 5    | Family-Q    | IV-3                | +            | +        | +            | -                | -                  | -                  | -                |
| 6    | Family-34   | IV-6                | NA           | NA       | NA           | -                | +                  | -                  | -                |
| 7    | Family-62   | IV-3                | -            | +        | +            | -                | -                  | -                  | -                |
| 8    | Family-64   | II-2                | NA           | +        | +            | -                | -                  | -                  | -                |
| 9    | Family-69   | II-1                | NA           | +        | +            | -                | -                  | -                  | -                |
| 10   | Family-75   | IV-1                | NA           | +        | +            | -                | -                  | -                  | -                |
| 11   | Family-93   | IV-3                | NA           | -        | +            | -                | -                  | +                  | -                |
| 12   | Family-419  | IV-2                | -            | -        | -            | +                | -                  | -                  | -                |
| 13   | Family-L    | II-1                | +            | +        | -            | -                | -                  | -                  | +                |
| 14   | Family-S    | III-3               | +            | +        | +            | -                | -                  | -                  | -                |
| 15   | Family-82   | IV-1                | -            | -        | -            | +                | +                  | +                  | -                |

|    |            |      |    |    |    |   |   |   |   |
|----|------------|------|----|----|----|---|---|---|---|
| 16 | Family-116 | V-4  | -  | -  | -  | - | - | - | - |
| 17 | Family-42  | IV-6 | -  | -  | -  | - | - | - | - |
| 18 | Family-50  | II-5 | NA | +  | +  | - | - | - | - |
| 19 | Family-53  | IV-2 | NA | +  | +  | - | - | - | - |
| 20 | Family-74  | II-2 | NA | +  | +  | - | - | - | - |
| 21 | Family-V   | IV-2 | +  | +  | +  | - | - | - | + |
| 22 | Family-O   | II-1 | +  | +  | +  | - | - | - | - |
| 23 | Family-38  | II-2 | +  | -  | +  | - | - | - | - |
| 24 | Family-58  | II-2 | +  | +  | +  | - | - | - | - |
| 25 | Family-78  | II-1 | -  | -  | -  | - | - | - | - |
| 26 | Family-41B | II-1 | -  | +  | +  | - | - | - | - |
| 27 | Family-K   | IV-1 | -  | -  | +  | - | - | - | - |
| 28 | Family-Y   | II-1 | +  | +  | +  | - | - | - | - |
| 29 | Family-57  | II-1 | +  | +  | +  | - | - | - | - |
| 30 | Family-E   | II-2 | +  | +  | +  | + | + | - | + |
| 31 | Family-G   | II-1 | -  | -  | -  | - | - | - | - |
| 32 | Family-59  | IV-2 | -  | -  | -  | - | - | - | - |
| 33 | Family-59  | IV-3 | NA | NA | NA | - | - | - | - |
| 34 | Family-91  | IV-5 | -  | -  | -  | - | - | - | + |

|    |            |      |   |   |   |    |    |    |    |
|----|------------|------|---|---|---|----|----|----|----|
| 35 | Family-P   | II-1 | - | - | + | -  | -  | -  | +  |
| 36 | Family-85  | IV-2 | - | - | - | -  | -  | -  | +  |
| 37 | Family-T   | IV-6 | + | + | + | -  | -  | -  | +  |
| 38 | Family-35  | II-5 | - | - | - | -  | -  | -  | -  |
| 39 | Family-35  | II-6 | - | - | - | -  | -  | -  | -  |
| 40 | Family-47  | IV-6 | - | - | - | -  | -  | -  | -  |
| 41 | Family-55  | II-1 | - | - | - | -  | -  | -  | -  |
| 42 | Family-U   | IV-2 | + | + | + | +  | +  | -  | -  |
| 43 | Family-70  | II-6 | + | + | + | -  | -  | -  | -  |
| 44 | Family-83  | IV-1 | - | - | - | -  | -  | -  | -  |
| 45 | Family-36  | IV-3 | + | + | + | -  | -  | -  | -  |
| 46 | Family-54  | IV-4 | - | - | - | -  | -  | -  | -  |
| 47 | Family-506 | II-1 | + | + | + | +  | -  | -  | -  |
| 48 | Family-128 | IV-5 | - | - | - | -  | -  | +  | -  |
| 49 | Family-31  | II-3 | + | + | + | -  | -  | -  | +  |
| 50 | Family-31  | II-4 | + | + | - | -  | -  | -  | -  |
| 51 | Family-B   | II-3 | + | + | + | NA | NA | NA | NA |
| 52 | Family-C   | II-3 | + | + | + | -  | -  | -  | -  |
| 53 | Family-M   | II-1 | + | + | + | -  | -  | -  | -  |
| 54 | Family-80  | IV-1 | + | + | + | -  | -  | -  | -  |



|    |            |      |    |    |    |    |    |    |    |
|----|------------|------|----|----|----|----|----|----|----|
| 55 | Family-32  | V-5  | -  | -  | -  | -  | -  | -  | -  |
| 56 | Family-40  | II-2 | +  | +  | +  | -  | -  | -  | -  |
| 57 | Family-43  | IV-1 | -  | -  | -  | -  | -  | -  | -  |
| 58 | Family-52  | IV-2 | +  | +  | +  | -  | -  | -  | -  |
| 59 | Family-46  | II-1 | -  | -  | -  | +  | -  | +  | -  |
| 60 | Family -49 | IV-1 | +  | +  | +  | -  | -  | -  | -  |
| 61 | Family-56  | II-2 | -  | -  | -  | -  | -  | -  | -  |
| 62 | Family-60  | V-1  | -  | -  | +  | -  | -  | -  | -  |
| 63 | Family-63  | II-3 | -  | +  | -  | -  | -  | -  | -  |
| 64 | Family-89  | II-5 | -  | -  | +  | -  | -  | -  | -  |
| 65 | Family-67  | II-1 | -  | -  | -  | NA | NA | NA | NA |
| 66 | Family-72  | IV-1 | NA | NA | NA | NA | -  | -  | -  |
| 67 | Family-72  | IV-2 | +  | +  | +  | -  | -  | -  | -  |
| 68 | Family-72  | IV-3 | NA | -  | +  | -  | -  | -  | -  |
| 69 | Family-76  | IV-2 | -  | -  | -  | -  | -  | -  | -  |
| 70 | Family-77  | II-2 | NA | NA | NA | -  | -  | -  | -  |
| 71 | Family-90  | IV-1 | +  | +  | +  | -  | -  | +  | -  |

|    |            |      |    |    |    |    |    |    |    |
|----|------------|------|----|----|----|----|----|----|----|
| 72 | Family-86  | II-2 | +  | +  | +  | -  | -  | -  | -  |
| 73 | Family-98  | II-2 | +  | -  | +  | NA | -  | -  | -  |
| 74 | Family-100 | IV-3 | -  | -  | -  | NA | -  | -  | -  |
| 75 | Family-101 | IV-2 | -  | +  | +  | NA | -  | -  | -  |
| 76 | Family-101 | IV-3 | -  | -  | -  | NA | -  | -  | -  |
| 77 | Family-118 | IV-4 | -  | -  | -  | NA | -  | -  | -  |
| 78 | Family-121 | II-1 | -  | -  | -  | NA | -  | -  | -  |
| 79 | Family-122 | IV-2 | -  | +  | +  | NA | -  | -  | -  |
| 80 | Family-122 | IV-4 | -  | -  | -  | NA | -  | -  | +  |
| 81 | Family-123 | II-2 | -  | -  | -  | NA | -  | -  | -  |
| 82 | Family-73  | IV-2 | -  | -  | -  | NA | -  | -  | -  |
| 83 | Family-44  | IV-4 | NA | NA | NA | NA | NA | NA | NA |
| 84 | Family-28  | IV-I | +  | +  | +  | -  | -  | -  | -  |
| 85 | Family-F   | V-2  | +  | +  | +  | -  | -  | -  | +  |
| 86 | Family-H   | II-1 | -  | -  | -  | NA | NA | NA | NA |
| 87 | Family-I   | IV-I | +  | -  | +  | -  | -  | -  | +  |
| 88 | Family-X   | II-5 | -  | +  | +  | +  | +  | -  | +  |
| 89 | Family-R   | IV-I | -  | +  | +  | -  | -  | -  | -  |
| 90 | Family-45  | V-1  | -  | -  | -  | -  | -  | -  | -  |

|     |            |      |   |   |   |    |    |    |    |
|-----|------------|------|---|---|---|----|----|----|----|
| 91  | Family-45  | V-2  | - | + | + | -  | -  | -  | -  |
| 92  | Family-33  | II-2 | - | - | - | -  | -  | -  | +  |
| 93  | Family-41  | II-5 | + | + | + | -  | +  | +  | -  |
| 94  | Family-51  | IV-2 | - | + | + | -  | -  | -  | -  |
| 95  | Family-84  | II-1 | - | - | - | -  | -  | -  | -  |
| 96  | Family-84  | II-2 | - | - | - | -  | -  | -  | -  |
| 97  | Family-84  | II-3 | - | - | - | -  | -  | -  | -  |
| 98  | Family-120 | II-2 | - | + | + | +  | +  | +  | -  |
| 99  | Family-65  | II-1 | - | - | - | -  | -  | -  | -  |
| 100 | Family-71  | II-2 | - | - | - | -  | -  | +  | -  |
| 101 | Family-112 | II-3 | + | + | + | -  | -  | -  | +  |
| 102 | Family-94  | II-4 | + | + | + | -  | +  | +  | -  |
| 103 | Family-66  | IV-4 | - | - | - | -  | -  | -  | -  |
| 104 | Family-79  | IV-3 | - | - | - | -  | -  | -  | -  |
| 105 | Family-81  | IV-2 | - | - | - | NA | NA | NA | NA |
| 106 | Family-87  | II-6 | - | + | + | -  | +  | +  | +  |
| 107 | Family-88  | II-2 | - | - | + | +  | +  | +  | -  |
| 108 | Family-92  | II-1 | + | + | + | +  | +  | +  | -  |
| 109 | Family-95  | IV-1 | + | + | + | +  | -  | -  | +  |

|     |            |       |   |   |   |   |   |   |   |
|-----|------------|-------|---|---|---|---|---|---|---|
| 110 | Family-96  | IV-2  | - | - | - | + | - | - | - |
| 111 | Family-97  | III-2 | + | + | + | + | + | + | - |
| 112 | Family-97  | III-4 | - | - | - | + | + | + | - |
| 113 | Family-107 | II-2  | - | - | - | + | - | - | + |

Abbreviations: +, present; -, absent; and, NA, not analysed.

**Table B.** PCR primers used for the mutation analysis of the *ATP7B* gene.

| Sl.# | Exon | Primer sequence (5'→3')                                         | T <sub>m</sub> (°C) | Amplicon size (bp) |
|------|------|-----------------------------------------------------------------|---------------------|--------------------|
| 1    | 1    | F: GACGGCGGGCGCGCAACTTTGAATC<br>R: TCTGGCTCGGCCTTCCCTGCGCA      | 64                  | 396                |
| 2    | 2    | AF: AGTGGCATTGTTTTCCATTTTCTCAG<br>AR: CTTTCCTTCTGCAATGCTGGCCTC  | 64                  | 435                |
| 3    | 2    | BF: AGCATGAAGGTTTCCCTGGAACAAG<br>BR: CTTCCCTGGTGCCCCAAGGTCTC    | 64                  | 500                |
| 4    | 2    | CF: TGATATTGAGCGGTTACAAAGCACTA<br>CR: AGAACTGGAAGACCTGTGATCTGTC | 64                  | 364                |
| 5    | 2    | DF: GCTATCGAGGCACTTCCACCTGG<br>DR: GGGAGCAGGGCTCACCTATACCA      | 64                  | 440                |
| 6    | 3    | F: GGTGGGAGCCGGGACAATGAACC<br>R: GTTATCAGGGCTACTGATAAACACAG     | 64                  | 469                |
| 7    | 4    | F: CTCATGTGCAGCCTCATTTTCAAAC<br>R: CCAAGATGGGGAAATTTACTAATCAC   | 62                  | 410                |
| 8    | 5    | F: CTTGGCTGCCTGTTACCTAGACTC<br>R: CCATTCACTGATATCCTCCCTCAGA     | 64                  | 458                |
| 9    | 6    | F: CAGAAAACCCACAAAGTCTACTGAGG<br>R: AAAGGCAGCTAATCCAGGAGGAAGG   | 64                  | 335                |
| 10   | 7    | F: CAAAGGCAGGTCTTAAACTGTGTCC;<br>R: GCTAAAGCACTATGTTTGCCTTAGC   | 64                  | 367                |
| 11   | 8    | F: GTACTGTCACGACTGTGCACAAAGC<br>R: CCTATTTCTTTAAGTCTGTCTCTATGC  | 62                  | 476                |
| 12   | 9    | F: CATGTGTGGTGGATAGCAAGTAACG<br>R: CTTGCTTTCGTAGCTGGATTGAGAG    | 62                  | 414                |
| 13   | 10   | F: CAAATGAATACTGTTGCTCAGTATAAGC<br>R: TGGCATGGCTTCTCCTAGACGTAGG | 60                  | 372                |
| 14   | 11   | F: TTCATGTTCCCTCAGGAGGATATCA<br>R: TCAGCCAGCTGCTGAATGGGTGC      | 64                  | 484                |
| 15   | 12   | F: AAGAGGCTCAGATGTCAAAGGTAATGA<br>R: AGAAACCTGCAGAAGGAGAGTGACTG | 64                  | 554                |

|    |    |                                                                |    |     |
|----|----|----------------------------------------------------------------|----|-----|
| 16 | 13 | F: AGTGCCCCCTGAAATGTCCTTATG<br>R: GTTCCATTATATGACTGGTGGCTACTC  | 64 | 471 |
| 17 | 14 | F: GTTGAACCCTGAGATTGAACGACAG<br>R: ACTGCCCGTACTCCCCAAGACCG     | 64 | 655 |
| 18 | 15 | F: TCTCAGTCCCGCTTCCGCTGCTC<br>R: CAGAGGCAATCACTGCTGGGCGTG      | 64 | 383 |
| 19 | 16 | F: GGATGCTGTACAAGAGGTGCTTACA<br>R: TGGAAAACAGGCCTGAAATTAAGAGAG | 64 | 423 |
| 20 | 17 | F: ATTCCTGGGGAGCCACTGCGAAGA<br>R: ACAGCTCAGTGCTGGGCCAACTGG     | 64 | 460 |
| 21 | 18 | F: CAAACCTGCAGGGTGTGGTTGACCA<br>R: CACCACATCCAGCAAATCATTCTGATG | 64 | 446 |
| 22 | 19 | F: GACGTCGTCCTTATCAGAGTGAGCG<br>R: CCTTTCTAAAACGCCTCTAGCCAGC   | 64 | 336 |
| 23 | 20 | F: GTTCTGGGAACATCAGGGCGAGTG<br>R: TGAATGGGAAATGAGAGGCAAGTTCCA  | 64 | 445 |
| 24 | 21 | F: AAAGATGGATGAGAGGCCTTACCAG<br>R: GTCCCCAAAGCTGGAGGCTAGCTCA   | 64 | 471 |

Abbreviations: F, forward primer; R, reverse primer; bp, base pairs; and  $T_m$ , annealing temperature.

**Table C.** UTR-specific PCR primers used for the mutation analysis of the *ATP7B* gene.

| Sl.# | 5'/3'UTRs | Primer sequence (5'→3')                                    | T <sub>m</sub> (°C) | Amplicon size (bp) |
|------|-----------|------------------------------------------------------------|---------------------|--------------------|
| 1    | 5'UTR     | F:atagattggaaaatgtctcgtggctc; R: gccacgccgaactagtctacg     | 56                  | 592                |
| 2    | 5'UTR     | F:ccgacccccgaactcaggaacgct; R: agctgcgagagccgggccgag       | 58                  | 572                |
| 3    | 5'UTR     | F:gacagccagcgcagagtccgagg; R: gcaaacaggggtccggaaccgcc      | 62                  | 592                |
| 4    | 3'UTR     | F:tggactctagtccttgctggactg; R: tgtgtgagccaggaagcaggttcaag  | 62                  | 446                |
| 5    | 3'UTR     | F:ctctcagagcagcagaacgggttcag; R: tgacggacagcggaaatgtgctgcg | 60                  | 629                |
| 6    | 3'UTR     | F:aaaatccaagcgcgctgttgattgtg; R: agccctcgtgaagacaagacggc   | 60                  | 413                |

Abbreviations: F, forward primer; R, reverse primer; bp, base pairs; and T<sub>m</sub>, annealing temperature.

**Table D.** Details of primers used in allele-specific PCR.

| Sl.# | Mutation                      | Primer sequence (5'→3')                                         | T <sub>m</sub> (°C) | Amplicon size (bp) |
|------|-------------------------------|-----------------------------------------------------------------|---------------------|--------------------|
| 1    | c.172_173insC<br>(p.A58fs*19) | F: GGCCCTTCTTCTCAGGTGGCCC<br>R: CTTTCCTTCTGCAATGCTGGCCTC        | 60                  | 235                |
| 2    | c.220_222delA<br>(p.K74fs*9)  | F: CATGACTTGCCAGTCATGTGTGAG<br>R: CTTTCCTTCTGCAATGCTGGCCTC      | 60                  | 190                |
| 3    | c.841C>T<br>(p.Q281*)         | F: GTCTTGAATATTGAAGAAAATATTGGCT<br>R: AGAACTGGAAGACCTGTGATCTGTC | 54                  | 214                |
| 4    | c.1048delC<br>(p.P350fs*12)   | F: CTCATTCCCCTGGCTCCCCACG<br>R: GGGAGCAGGGCTCACCTATAACCA        | 52                  | 352                |
| 5    | c.1442C>G<br>(p.S481*)        | F: ACATCTTGCAAAGTCCCCACAATG<br>R: GTTATCAGGGCTACTGATAAACACAG    | 52                  | 229                |
| 6    | c.2255T>G<br>(p.V752G)        | F: TCTGGTCATCCTGGTGGTTGCTGG<br>R: CCTATTTCTTTAAGTCTGTCTCTATGC   | 58                  | 246                |
| 7    | c.2435delA<br>(p.N812fs*2)    | F: CGTTGTGACCCTTGGTGAGGACAT<br>R: CTTGCTTTCGTAGCTGGATTGAGAG     | 54                  | 190                |
| 8    | c.2534T>C<br>(p.V845A)        | F: GGAAAGTTTCCAGTGGATGGGAAAGC<br>R: TGGCATGGCTTCTCCTAGACGTAGG   | 58                  | 191                |
| 9    | c.2666A>C<br>(p.H889P)        | F: GCTCTGTGCTCATTAAAGCTACCCC<br>R: TCAGCCAGCTGCTGAATGGGTGC      | 52                  | 322                |
| 10   | c.3551insA<br>(p.I1184fs*1)   | F: ACAGACAGCCATCCTGGTGGCTAAT<br>R: TGGAAAACAGGCCTGAAATTAAGAGAG  | 50                  | 166                |
| 11   | c.3920T>A<br>(p.V1307E)       | F: CCTTATCAGAAATGATTTGCTGGATGA<br>R: CCTTTCTAAAACGCCTCTAGCCAGC  | 52                  | 246                |

Abbreviations: F, forward primer; R, reverse primer; bp, base pairs; and T<sub>m</sub>, annealing temperature.



**Table E.** Microsatellite markers flanking the *ATP7B* gene.

| Sl.# | Microsatellite marker <sup>a</sup> | Physical distance (Mb) of the markers from the <i>ATP7B</i> gene <sup>b</sup> |
|------|------------------------------------|-------------------------------------------------------------------------------|
| 1    | D13S1325                           | 0.028                                                                         |
| 2    | D13S773                            | 0.558                                                                         |
| 3    | D13S1305                           | 0.590                                                                         |

a, b The physical distance between the markers and *ATP7B* are according to UCSC Genome Bioinformatics site (<http://genome.ucsc.edu/>).

**Table F.** *In silico* analysis to determine if the novel missense variants identified in the present study are mutations.

| <b>Sl.#</b> | <b>Mutation</b>             | <b>Family</b> | <b>PolyPhen-2 score</b>                | <b>Mutation Taster score</b>           | <b>SIFT score</b>                     |
|-------------|-----------------------------|---------------|----------------------------------------|----------------------------------------|---------------------------------------|
| 1           | c.2204T>G<br>(p.Leu735Arg)  | Family-M      | Probably damaging with a score of 1    | Disease causing with a p-value of 2.78 | Damaging mutation with a p-value of 0 |
| 2           | c.2255T>G<br>(p.Val752Gly)  | Family-41B    | Benign with a score of 0.449           | Disease causing with a p-value of 0.99 | Damaging mutation with a p-value of 0 |
| 3           | c.2534T>C<br>(p.Val845Ala)  | Family-80     | Probably damaging with a score of 0.83 | Disease causing with a p-value of 0.99 | Damaging mutation with a p-value of 0 |
| 4           | c.2666A>C<br>(p.His889Pro)  | Family-123    | Probably damaging with a score of 1    | Disease causing with a p-value of 2.10 | Damaging mutation with a p-value of 0 |
| 5           | c.3920T>A<br>(p.Val1307Glu) | Family-49     | Probably damaging with a score of 1    | Disease causing with a p-value of 3.30 | Damaging mutation with a p-value of 0 |
| 6           | c.4015G>C<br>(p.Ala1339Pro) | Family-C      | Probably damaging with a score of 1    | Disease causing with a p-value of 0.74 | Damaging mutation with a p-value of 0 |

**Table G.** Non-disease causing variants identified in the *ATP7B* gene in Wilson disease families.

| Sl.# | Variants                | 5'UTR/Exon(E)/Intron(I) | Family (zygosity)                                                                                                                                                                                                                                                                                                                                                                                                                                                                                                                                                                                                                                                                          | dbSNP entry |
|------|-------------------------|-------------------------|--------------------------------------------------------------------------------------------------------------------------------------------------------------------------------------------------------------------------------------------------------------------------------------------------------------------------------------------------------------------------------------------------------------------------------------------------------------------------------------------------------------------------------------------------------------------------------------------------------------------------------------------------------------------------------------------|-------------|
| 1    | c.-190C>G               | 5'UTR                   | Family-92 & Family-128 (Homozygous); Family-60, Family-506, Family-31, Family-72, Family-67, Family-77, Family-76 & Family-73 (Heterozygous)                                                                                                                                                                                                                                                                                                                                                                                                                                                                                                                                               | Novel       |
| 2    | c.-168T>G               | 5'UTR                   | Family-92 (Homozygous)                                                                                                                                                                                                                                                                                                                                                                                                                                                                                                                                                                                                                                                                     | Novel       |
| 3    | c.-128A>C               | 5'UTR                   | Family-72 & Family-84 (Heterozygous)                                                                                                                                                                                                                                                                                                                                                                                                                                                                                                                                                                                                                                                       | rs73184332  |
| 4    | c.-142T>C               |                         | Family-32, Family-43, Family-52 & Family-122 (Homozygous); Family-W & Family-40 (Heterozygous)                                                                                                                                                                                                                                                                                                                                                                                                                                                                                                                                                                                             | Novel       |
| 5    | c.-117_-118insCGCCG     | 5'UTR                   | Family-H, Family-K, Family-P, Family-Y, Family-85, Family-55, Family-T, Family-89, Family-73, Family-47, Family-49 & Family-35 (Homozygous); Family-72, Family-63, Family-34, Family-84 & Family-98 (Heterozygous)                                                                                                                                                                                                                                                                                                                                                                                                                                                                         | rs148013251 |
| 6    | c.-75C>A                | 5'UTR                   | Family-57, Family-Y, Family-47, Family-55, Family-50, Family-58, Family-78, Family-V, Family-82, Family-116, Family-419, Family-85, Family-28, Family-C, Family-F, Family-H, Family-I, Family-K, Family-O, Family-P, Family-R, Family-S, Family-T, Family-42, Family-45, Family-53, Family-60, Family-66, Family-73, Family-79, Family-95, Family-74, Family-87, Family-88, Family-98, Family-89, Family-94, Family-101, Family-47, Family-49, Family-35, Family-38 & Family-41 (Homozygous); Family-506, Family-34, Family-44, Family-W, Family-B, Family-E, Family-419, Family-G, Family-L, Family-72, Family-92, Family-63, Family-84, Family-74, Family-97 & Family-41B (Heterozygous) | rs2277448   |
| 7    | c.261C>T (p.Ile87Ile)   | E1                      | Family-54 (Heterozygous)                                                                                                                                                                                                                                                                                                                                                                                                                                                                                                                                                                                                                                                                   | Novel       |
| 8    | c.1216T>G (p.Ser406Ala) | E2                      | Family-28, Family-85, Family-H, Family-P, Family-T, Family-73, Family-95, Family-89, Family-47, Family-49, Family-47, Family-35 & Family-41 (Homozygous); Family 506, Family-W, Family-55, Family-G, Family-K, Family-                                                                                                                                                                                                                                                                                                                                                                                                                                                                     | rs1801243   |

|    |                            |     |                                                                                                                                                                                                                                                                                                                                                                                                                                                          |             |
|----|----------------------------|-----|----------------------------------------------------------------------------------------------------------------------------------------------------------------------------------------------------------------------------------------------------------------------------------------------------------------------------------------------------------------------------------------------------------------------------------------------------------|-------------|
|    |                            |     | 72, Family-84 & Family-63 (Heterozygous)                                                                                                                                                                                                                                                                                                                                                                                                                 |             |
| 9  | c.1366G>C<br>(p.Val456Leu) | E3  | Family-28, Family-P, Family-T, Family-95, Family-85, Family-89, Family-47, Family-49, Family-35 & Family-41 (Homozygous); Family-W, Family-506, Family-G, Family-H, Family-55, Family-63, Family-K, Family-72 & Family-84 (Heterozygous)                                                                                                                                                                                                                 | rs1801244   |
| 10 | IVS4-53A>C                 | I4  | Family-U, Family-T, Family-35, Family-47, Family-55, Family-82, Family-116, Family-V, Family-419, Family-41B, Family-58, Family-P, Family-85, Family-118, Family-S, Family-42, Family-50, Family-53, Family-O, Family-101, Family-73, Family-79 & Family-98 (Homozygous); Family-K, Family-70, Family-B, Family-G, Family-W, Family-L, Family-38, Family-84, Family-86, Family-87, Family-88, Family-74, Family-78, Family-89 & Family-97 (Heterozygous) | rs2147363   |
| 11 | c.2196C>T (p.Leu732Leu)    | E8  | Family 73, Family-72, Family, 86 & Family, 97(Homozygous); Family-28, Family-34, Family-L, Family-63, Family-H & Family-I (Heterozygous)                                                                                                                                                                                                                                                                                                                 | rs201213995 |
| 12 | c.2292C>T (p.Phe764Phe)    | E8  | Family-28, Family-H, Family-I, Family-95, Family-51 & Family-41 (Homozygous); Family-W (Heterozygous)                                                                                                                                                                                                                                                                                                                                                    | rs372979339 |
| 13 | IVS10-25G>A                | I10 | Family-28, Family-H, Family-P, Family-85, Family-M, Family-T, Family-95, Family-47, Family-89, Family-94 & Family-35 (Homozygous); Family-W, Family-506, Family-E, Family-G, Family-K, Family-72, Family-84, Family-63, Family-55, Family-88, Family-98 & Family-97 (Heterozygous)                                                                                                                                                                       | rs9526811   |
| 14 | c.2484C>T (p.Gly828Gly)    | E10 | Family-D, Family-F, Family-N, Family-H, Family-A, Family-Q, Family-60, Family-62, Family-64, Family-69, Family-75 & Family-93 (Homozygous); Family-W, Family-70, Family-A & Family-34 (Heterozygous)                                                                                                                                                                                                                                                     | rs570594838 |
| 15 | c.2495A>G<br>(p.Lys832Arg) | E10 | Family-28, Family-128, Family-C, Family-I, Family-116, Family-419, Family-I, Family-M, Family-P, Family-R, Family-S, Family-T, Family-42, Family-45, Family-53, Family-66, Family-73, Family-92, Family-95, Family-88, Family-98, Family74, Family-89, Family-94, Family-47, Family-49, Family-50, Family-55, Family-35, Family-41, Family-80, Family-81, Family-82 & Family-85 (Homozygous); Family-W, Family-506, Family-E, Family-                    | rs1061472   |

|    |                             |     |                                                                                                                                                                                                                                                                                                                                                                                                                                                                                                                                                                                                               |           |
|----|-----------------------------|-----|---------------------------------------------------------------------------------------------------------------------------------------------------------------------------------------------------------------------------------------------------------------------------------------------------------------------------------------------------------------------------------------------------------------------------------------------------------------------------------------------------------------------------------------------------------------------------------------------------------------|-----------|
|    |                             |     | G, Family-44, Family-K, Family-L, Family-K, Family-74, Family-M, Family-72, Family-78, Family-84, Family-56, Family-57, Family-97, Family-34 & Family-38 (Heterozygous)                                                                                                                                                                                                                                                                                                                                                                                                                                       |           |
| 16 | c.2855G>A<br>(p.Arg952Lys)  | E12 | Family-28, Family-128, Family-C, Family-F, Family-H, Family-P, Family-R, Family-53, Family-92, Family-95, Family-56, Family-63, , Family-89, Family-94, Family-S, Family-42, Family-50, Family-T, Family-116, Family-419, Family-35, Family-55, Family-94, Family-97, Family-47, Family-49, Family-50, Family-35, Family-41, Family-80, Family-81, Family-82 & Family-85 (Homozygous); Family-W, Family-34, Family-L, Family-74, Family-506, Family-78, Family-E, Family-44, Family-K, Family-419, Family-G, Family-72, Family-84, Family-57, Family-87, Family-88, Family-98 & Family-38 (Heterozygous)      | rs732774  |
| 17 | c.2973G>A (Thr991Thr)       | E13 | Family-123 (Homozygous); Family-77 & Family-84 (Heterozygous)                                                                                                                                                                                                                                                                                                                                                                                                                                                                                                                                                 | rs1801246 |
| 18 | c.2976C>T (p.Pro992Pro)     | E13 | Family-59, Family-91, Family-419 & Family-79 (Homozygous); Family-E, Family-44, Family-G & Family-56 (Heterozygous)                                                                                                                                                                                                                                                                                                                                                                                                                                                                                           | Novel     |
| 19 | c.3009G>A<br>(p.Ala1003Ala) | E13 | Family-128, Family-82, Family-116, Family-419, Family-S, Family-42, Family-53 & Family-50 (Homozygous); Family-74, Family-L, Family-55, Family-56 & Family-97 (Heterozygous)                                                                                                                                                                                                                                                                                                                                                                                                                                  | rs1801247 |
| 20 | c.3237T>C<br>(p.Cys1079Cys) | E14 | Family-73 (Homozygous)                                                                                                                                                                                                                                                                                                                                                                                                                                                                                                                                                                                        | Novel     |
| 21 | c.3419T>C<br>(p.Val1140Ala) | E16 | Family-28, Family-128, Family-C, Family-F, Family-H, Family-I, Family-M, Family-P, Family-S Family-116, Family-419, Family-T, Family-42, Family-53, Family-66, Family-55, Family-73, Family-74, Family-89, Family-94, Family-97, Family-47, Family-49, Family-50, Family-419, Family-P, Family-M, Family-34, Family-35, Family-80, Family-81, Family-82 & Family-85 (Homozygous); Family-506, Family-E, Family-W, Family-34, Family-78, Family-43, Family-G, Family-K, Family-L, Family-44, Family-72, Family-84, Family-92, Family-56, Family-57, Family-63, Family-74, Family-88 & Family-38 (Heterozygous) | rs1801249 |

|    |             |     |                                                                                                                                                                                                                                                                                                                                                                                                                                                                                                                                                                 |           |
|----|-------------|-----|-----------------------------------------------------------------------------------------------------------------------------------------------------------------------------------------------------------------------------------------------------------------------------------------------------------------------------------------------------------------------------------------------------------------------------------------------------------------------------------------------------------------------------------------------------------------|-----------|
| 22 | IVS17-96A>G | I17 | WD-72 (Heterozygous)                                                                                                                                                                                                                                                                                                                                                                                                                                                                                                                                            | Novel     |
| 23 | IVS18+6C>T  | I18 | Family-28, Family-128, Family-C, Family-F, Family-H, Family-I, Family-M, Family-50, Family-419, Family-82, Family-116, Family-85, Family-P, Family-R, Family-S, Family-T, Family-35, Family-55, Family-47, Family-42, Family-45, Family-66, Family-73, Family-95, Family-74, Family-89, Family-53, Family-94, Family-M, Family-49 & Family-60 (Homozygous); Family-506, Family-W, Family-U, Family-K, Family-38, Family-Q, Family-G, Family-E, Family-L, Family-63, Family-44, Family-72, Family-84, Family-57, Family-74, Family-88 & Family-98 (Heterozygous) | rs2282057 |
| 24 | IVS19+50G>C | I19 | Family-35, Family-47, Family-55, Family-P, Family-85, Family-S, Family-28, Family-128, Family-89, Family-H, Family-I, Family-M, Family-T, Family-42, Family-45, Family-50, Family-53, Family-66, Family-73, Family-95, Family-82 & Family-116 (Homozygous); Family-L, Family-W, Family-38, Family-43, Family-506, Family-K, Family-57, Family-72, Family-74, Family-84, Family-92, Family-56, Family-63, Family-87, Family-88, Family-98, Family-94, Family-40, Family-419 & Family-35 (Heterozygous)                                                           | rs9535795 |

**Table H.** Genotype-phenotype correlation in Wilson disease families.

| Sl.# | Phenotypes                                                | Genotypes                                                |                                                           | Significance of correlation    |
|------|-----------------------------------------------------------|----------------------------------------------------------|-----------------------------------------------------------|--------------------------------|
|      |                                                           | Missense mutations<br>(Homozygous/Compound heterozygous) | Truncating<br>(nonsense/insertion /deletion)<br>mutations |                                |
| 1    | Age of onset (years)                                      | Average : $13.64 \pm 0.15$<br>n = 43                     | Average : $11 \pm 0.71$<br>n = 13                         | <i>p-value</i> = 0.1996        |
| 2    | Serum Copper<br>Normal range (75-160 mcg/dL)              | Average : $35.47 \pm 3.45$<br>n = 38                     | Average : $35.87 \pm 4.34$<br>n = 16                      | <i>p-value</i> = 0.9053        |
| 3    | Serum Ceruloplasmin<br>Normal range (15-35)               | Average : $21.65 \pm 3.77$<br>n = 40                     | Average : $17.16 \pm 6.47$<br>n = 14                      | <i>p-value</i> = 0.8693        |
| 4    | 24 hr Urinary Copper<br>Normal range (upto 210 mcg/24 hr) | Average : $415.60 \pm 57$<br>n = 43                      | Average : $170.36 \pm 73.49$<br>n = 11                    | <i>p-value</i> = 0.5187        |
| 5    | Kayser–Fleischer ring                                     | 45/46 (97.82% )                                          | 12/13 (92.30%)                                            | <i>p-value</i> = 0.3241        |
| 6    | Dysphagia                                                 | 19/42 (45%)                                              | 9/13 (69.23%)                                             | <i>p-value</i> = 0.1354        |
| 7    | Dysarthria                                                | 31/44 (70.45%)                                           | 12/13 (92.30%)                                            | <i>p-value</i> = 0.1116        |
| 8    | <b>Tremor</b>                                             | <b>24/43 (55.81%)</b>                                    | <b>3/13 (23.07%)</b>                                      | <b><i>p-value</i> = 0.0390</b> |
| 9    | <b>Dystonia</b>                                           | <b>20/45 (44.44%)</b>                                    | <b>11/12 (91.66%)</b>                                     | <b><i>p-value</i> = 0.0030</b> |
| 10   | Writing difficulty                                        | 29/43 (67.44%)                                           | 12/13 (92.30%)                                            | <i>p-value</i> = 0.0785        |
| 11   | Chorea                                                    | 7/47 (14.89%)                                            | 2/13 (15.38%)                                             | <i>p-value</i> = 0.9657        |
| 12   | Athetosis                                                 | 1/41 (2.43%)                                             | 1/13 (7.69%)                                              | <i>p-value</i> = 0.4031        |
| 13   | Parkinsonism                                              | 19/41 (46.34%)                                           | 6/9 (66.66%)                                              | <i>p-value</i> = 0.2788        |
| 14   | <b>Rigidity</b>                                           | <b>20/45 (4.44%)</b>                                     | <b>10/13 (76.92%)</b>                                     | <b><i>p-value</i> = 0.0396</b> |

|    |                     |                      |                       |                                   |
|----|---------------------|----------------------|-----------------------|-----------------------------------|
| 15 | <b>Bradykinesia</b> | <b>7/45 (15.55%)</b> | <b>11/13 (84.61%)</b> | <b><i>p-value</i> &lt; 0.0001</b> |
| 16 | Cerebral Atrophy    | 6/48 (12.5%)         | 1/13 (7.69%)          | <i>p-value</i> = 0.6211           |
| 17 | Cerebellar Atrophy  | 1/46 (2.17%)         | 1/12 (8.33%)          | <i>p-value</i> = 0.3061           |
| 18 | Brain Stem Atrophy  | 2/46 (4.34%)         | 2/12 (16.66%)         | <i>p-value</i> = 0.1384           |
| 19 | Giant Panda Sign    | 7/51 (13.72%)        | 1/14 (7.14%)          | <i>p-value</i> = 0.5142           |
| 20 | <b>Hepatomegaly</b> | <b>5/29 (17.24%)</b> | <b>6/12 (50%)</b>     | <b><i>p-value</i> = 0.0315</b>    |
| 21 | <b>Splenomegaly</b> | <b>4/33 (12.12%)</b> | <b>8/12 (66.66%)</b>  | <b><i>p-value</i> = 0.0001</b>    |
| 22 | Jaundice            | 10/28 (35.71%)       | 6/13 (46.15%)         | <i>p-value</i> = 0.5356           |

\*, p<0.05; \*\*, p<0.01; and \*\*\*, p<0.00



**Table I.** Wilson disease affected individuals with ceruloplasmin levels and associated homozygous/compound heterozygous mutations.

| Sl.# | Family name | Affected individual | Mutation                                             | Serum ceruloplasmin<br>(Normal range:15-35mg/dL) |
|------|-------------|---------------------|------------------------------------------------------|--------------------------------------------------|
| 1    | Family-D    | II-1                | c.813C>A (p.Cys271*)                                 | 1                                                |
| 2    | Family-N    | IV-3                | c.813C>A (p.Cys271*)                                 | 2                                                |
| 3    | Family-Q    | IV-3                | c.813C>A (p.Cys271*)                                 | 4                                                |
| 4    | Family-62   | IV-3                | c.813C>A (p.Cys271*)                                 | 2                                                |
| 5    | Family-64   | II-2                | c.813C>A (p.Cys271*)                                 | NA                                               |
| 6    | Family-69   | II-1                | c.813C>A (p.Cys271*)                                 | 5                                                |
| 7    | Family-75   | IV-1                | c.813C>A (p.Cys271*)                                 | 2                                                |
| 8    | Family-93   | IV-3                | c.813C>A (p.Cys271*)                                 | 2.7                                              |
| 9    | Family-419  | IV-2                | c.2131G>T (p.Gly711Trp))                             | 4                                                |
| 10   | Family-L    | II-1                | c.2131G>T (p.Gly711Trp)<br>/c.3809A>G (p.Asp1270Ser) | 4                                                |
| 11   | Family-S    | III-3               | c.2131G>T (p.Gly711Trp)                              | 4                                                |

|    |            |      |                                                      |    |
|----|------------|------|------------------------------------------------------|----|
| 12 | Family-82  | IV-1 | c.2131G>T (p.Gly711Trp)                              | 4  |
| 13 | Family-116 | V-4  | c.2131G>T (p.Gly711Trp)                              | 10 |
| 14 | Family-42  | IV-6 | c.2131G>T (p.Gly711Trp)                              | 2  |
| 15 | Family-50  | II-5 | c.2131G>T (p.Gly711Trp)                              | 3  |
| 16 | Family-53  | IV-2 | c.2131G>T (p.Gly711Trp)                              | 7  |
| 17 | Family-V   | IV-2 | c.3182G>A (p.Gly1061Glu)                             | 4  |
| 18 | Family-O   | II-1 | c.3182G>A (p.Gly1061Glu)                             | 4  |
| 19 | Family-58  | II-2 | c.3182G>A (p.Gly1061Glu)                             | 4  |
| 20 | Family-41B | II-1 | c.2255T>G (p.Val752Gly)/<br>c.3182G>A (p.Gly1061Glu) | 3  |
| 21 | Family-K   | IV-1 | c.4021G>A (p.Gly1341Ser)                             | 10 |
| 22 | Family-59  | IV-2 | c.3532A>G (p.Thr1178Ala)                             | 7  |

|    |            |      |                                                      |     |
|----|------------|------|------------------------------------------------------|-----|
| 23 | Family-59  | IV-3 | c.3532A>G (p.Thr1178Ala)                             | NA  |
| 24 | Family-91  | IV-5 | c.3532A>G (p.Thr1178Ala)                             | 4   |
| 25 | Family-P   | II-1 | c.2333G>A (p.Arg778Gln)                              | 5   |
| 26 | Family-85  | IV-2 | c.2333G>A (p.Arg778Gln)                              | 8   |
| 27 | Family-T   | IV-6 | c.3446G>C (p.Gly1149Ala)                             | 2   |
| 28 | Family-35  | II-5 | c.3446G>C (p.Gly1149Ala)                             | 16  |
| 29 | Family-35  | II-6 | c.3446G>C (p.Gly1149Ala)                             | 1   |
| 30 | Family-47  | IV-6 | c.3446G>C (p.Gly1149Ala)                             | 5   |
| 31 | Family-55  | II-1 | c.2303C>T (p.Pro768Leu)/<br>c.3446G>C (p.Gly1149Ala) | 8.6 |
| 32 | Family-83  | IV-1 | c.3008C>T (p.Ala1003Val)                             | 6   |
| 33 | Family-36  | IV-3 | c.3008C>T (p.Ala1003Val)                             | 4   |
| 34 | Family-54  | IV-4 | c.3008C>T (p.Ala1003Val)                             | 18  |
| 35 | Family-128 | IV-5 | c.220_222delA (p.Lys74fs*9)                          | 6   |
| 36 | Family-31  | II-3 | c.841C>T (p.Gln281*)                                 | 5   |

|    |           |      |                                                           |    |
|----|-----------|------|-----------------------------------------------------------|----|
| 37 | Family-B  | II-3 | c.172_173insC (p.Ala58fs*19)/<br>c.3741C>G (p.His1247Gln) | 2  |
| 38 | Family-M  | II-1 | c.2204T>G (p.Leu735Arg)                                   | 4  |
| 39 | Family-80 | IV-1 | c.2435delA (p.Asn812fs*2)                                 | NA |
| 40 | Family-32 | V-5  | c.3301G>A (p.Gly1101Arg)                                  | 4  |
| 41 | Family-40 | II-2 | c.3301G>A (p.Gly1101Arg)                                  | 5  |
| 42 | Family-43 | IV-1 | c.3301G>A (p.Gly1101Arg)                                  | 4  |
| 43 | Family-52 | IV-2 | c.3301G>A (p.Gly1101Arg)                                  | 5  |
| 44 | Family-46 | II-1 | c.2998G>A (p.Gly1000Arg)                                  | 9  |
| 45 | Family-49 | IV-1 | c.3920T>A (p.Val1307Glu)                                  | 2  |
| 46 | Family-60 | V-1  | c.1048delC (p.Pro350fs*12)                                | 6  |
| 47 | Family-63 | II-3 | c.3053C>T (p.Ala1018Val)/<br>c.3809A>G (p.Asp1270Ser)     | 3  |
| 48 | Family-89 | II-5 | c.3809A>G (p.Asp1270Ser)                                  | 3  |
| 49 | Family-72 | IV-1 | c.2267C>T (p.Ala756Val) &<br>c.2297C>T (p.Thr766Met)      | NA |
| 50 | Family-72 | IV-2 | c.2267C>T (p.Ala756Val) &<br>c.2297C>T (p.Thr766Met)      | 2  |
| 51 | Family-72 | IV-3 | c.2267C>T (p.Ala756Val) &<br>c.2297C>T (p.Thr766Met)      | 4  |
| 52 | Family-76 | IV-2 | c.2930C>T (p.Thr977Met)                                   | 5  |

|    |            |      |                                                            |     |
|----|------------|------|------------------------------------------------------------|-----|
| 53 | Family-90  | IV-1 | c.172_173insC (p.Ala58fs*19) &<br>c.3741C>G (p.His1247Gln) | 5   |
| 54 | Family-86  | II-2 | c.3551insA (p.Ile1184fs*1)                                 | 6   |
| 55 | Family-98  | II-2 | c.3722C>T (p.Ala1241Val)                                   | 3.5 |
| 56 | Family-100 | IV-3 | c.3008C>T (p.Ala1003Val)                                   | 7   |
| 57 | Family-101 | IV-3 | c.3182G>A (p.Gly1061Glu)                                   | 5   |
| 58 | Family-118 | IV-4 | c.2998G>A (p.Gly1000Arg)                                   | 8   |
| 59 | Family-122 | IV-2 | c.3301G>A (p.Gly1101Arg)                                   | 6   |
| 60 | Family-123 | II-2 | c.2666A>C (p.His889Pro)/<br>c.3155C>T (p.Pro1052Leu)       | 6   |
| 61 | Family-73  | IV-2 | c.3236G>T (p.Cys1101Arg)                                   | 26  |

**Table J.** Known mutations in *ATP7B*

| Sl. # | Mutation                              | Exon/int ron | Nature of mutation | Area of protein     | Ethnic origin of family                          | Reference      |
|-------|---------------------------------------|--------------|--------------------|---------------------|--------------------------------------------------|----------------|
| 1     | c.-441_-427del                        | Promoter     | Deletion           | Before CBD1         | Saridian                                         | 1              |
| 2     | c.-133A>C                             | Promoter     | Substitution       | Before CBD1         | Taiwanese                                        | 2              |
| 3     | c.-215A>T                             | Promoter     | Substitution       | Before CBD1         | Taiwanese                                        | 2              |
| 4     | c.-129_-125del                        | 5' UTR       | Deletion           | Before CBD1         | Japanese, North American                         | 3, 4           |
| 5     | c.-36C>T                              | 5'UTR        | Substitution       | Before CBD1         | Chinese                                          | 5              |
| 6     | c.-75A>C                              | 5'UTR        | Substitution       | Before CBD1         | Japanese                                         | 3              |
| 7     | c.19_20del (p.Gln7Aspfs*15)           | 1            | Deletion           | Before CBD1         | Czechs/Slovaks                                   | 6              |
| 8     | c.51+1G>A                             | 1            | Splice site        | Before CBD1         | Chinese                                          | 7              |
| 9     | c.51+4A>T                             | 1            | Splice site        | Before CBD1         | Brazil                                           | 8              |
| 10    | c.121A>G (p.Asn41Asp)                 | 2            | Missense           | Before CBD1         | Chinese                                          | 9              |
| 11    | c.122A>G (p.Asn41Ser)                 | 2            | Missense           | Before CBD1         | Brazil                                           | 8              |
| 12    | c.130T>A (p.Tyr44Asn)                 | 2            | Missense           | Before CBD1         | Chinese                                          | 10             |
| 13    | c.174dupC (p.Thr59Hisfs*19)           | 2            | Duplication        | CBD1                | Indian (East)                                    | 11             |
| 14    | c.174delC (p.Thr59Profs*9)            | 2            | Deletion           | CBD1                | Indian (West)                                    | 12             |
| 15    | c.199A>G (p.Met67Val)                 | 2            | Missense           | CBD1                | Indian (East and West)                           | 13             |
| 16    | c.213_214del (p.Val73Glufs*4)         | 2            | Deletion           | CBD1                | Sardinian, Bulgarian                             | 14             |
| 17    | c.216T>A (p.Cys72*)                   | 2            | Nonsense           | CBD1                | Italian                                          | 15             |
| 18    | c.254G>T (p.Gly85Val)                 | 2            | Missense           | CBD1                | Turkey, British, Chinese-Han                     | 1, 16, 17      |
| 19    | c.267dupG (p.Lys90Glufs*73)           | 2            | Duplication        | CBD1                | Turkish                                          | 18             |
| 20    | c.268_271del p.Lys90fs*10             | 2            | Deletion           | CBD1                | Chinese                                          | 7              |
| 21    | c.283C>T (p.Gln95*)                   | 2            | Nonsense           | CBD1                | Italian                                          | 19             |
| 22    | c.287G>A/A>G (p.Gly96Asp/p.Asp96Gly)  | 2            | Missense           | CBD1                | Chinese-Han                                      | 20             |
| 23    | c.314C>A (p.Ser105*)                  | 2            | Nonsense           | CBD1                | German, Chinese (Hong Kong), Chinese-Han Chinese | 21, 22, 23, 24 |
| 24    | c.328C>T (p.Gln110*)                  | 2            | Nonsense           | CBD1                | Turkish                                          | 18             |
| 25    | c.330delA (p.Gln110Hisfs*43)          | 2            | Deletion           | CBD1                | Egyptian                                         | 25             |
| 26    | c.331C>T (p.Gln111*)                  | 2            | Nonsense           | CBD1                | Italian, Spanish                                 | 1, 26          |
| 27    | c.343C>T (p.Gln115*)                  | 2            | Nonsense           | CBD1                | Yugoslavia                                       | 27             |
| 28    | c.365_366delinsTTCTGAAGC (p.Glu122fs) | 2            | Deletion/Insertion | CBD1                | Indian (West)                                    | 28             |
| 29    | c.367delG (p.A123Pfs*30)              |              | Deletion           | CBD1                | Chinese                                          | 7              |
| 30    | c.397delT (p.Trp133Glyfs*20)          | 2            | Deletion           | CBD1                | Greek (Crete)                                    | 29             |
| 31    | c.406A>G (Arg136Gly)                  | 2            | Missense           | Between CBD1 & CBD2 | Indian (Eastern and western)                     | 13             |
| 32    | c.433G>T (Val145Phe)                  | 2            | Missense           | CBD2                | Chinese                                          | 24             |
| 33    | c.442C >T (p.Arg148Trp)               | 2            | Missense           | CBD2                | Indian (West)                                    | 28             |
| 34    | c.448_452del (p.Glu150Hisfs*11)       | 2            | Deletion           | CBD2                | Indian (East), Indian (West)                     | 11, 12         |
| 35    | c.453delC (p.Met152*)                 | 2            | Nonsense           | CBD2                | Japanese, central Japan                          | 31, 32         |

|    |                                  |   |             |      |                                                                           |                        |
|----|----------------------------------|---|-------------|------|---------------------------------------------------------------------------|------------------------|
| 36 | c.463C>T (p.Gln155*)             | 2 | Nonsense    | CBD2 | Italian                                                                   | 15                     |
| 37 | c.470G>T (p.Cys157Phe)           | 2 | Missense    | CBD2 | Chinese                                                                   | 32                     |
| 38 | c.507delA (p.Gly170Glufs*2)      | 2 | Deletion    | CBD2 | Egyptian                                                                  | 25                     |
| 39 | c.509G>T (p.Gly170Val)           | 2 | Missense    | CBD2 | Italy                                                                     | 33                     |
| 40 | c.522_523insC                    | 2 | Insertion   | CBD2 | Thai                                                                      | 34                     |
| 41 | c.523insA                        | 2 | Insertion   | CBD2 | Chinese, Taiwan, American                                                 | 35, 36                 |
| 42 | c.524_525del (p.Val176Serfs*28)  | 2 | Deletion    | CBD2 | German                                                                    | 37                     |
| 43 | c.525dupA (p.Val176Serfs*28)     | 2 | Duplication | CBD2 | Chinese, Chinese-Han, Chinese (Hong Kong), Thai, Taiwanese                | 5, 7, 22, 34, 35       |
| 44 | c.525_526del (p.Lys175Asn*28)    | 2 | Deletion    | CBD2 | British                                                                   | 16                     |
| 45 | c.561T>A (p.Tyr187*)             | 2 | Nonsense    | CBD2 | Indian (East), Indian (West)                                              | 11, 12                 |
| 46 | c.561_563del (p.Tyr187*)         | 2 | Nonsense    | CBD2 | British                                                                   | 38                     |
| 47 | c.562C>T (p.Gln188*)             | 2 | Nonsense    | CBD2 | Serbian                                                                   | 15                     |
| 48 | c.650T>G (p.Leu217*)             | 2 | Nonsense    | CBD3 | Scottish                                                                  | 39                     |
| 49 | c.654_655del (p.Leu219Glyfs*4)   | 2 | Deletion    | CBD3 | French                                                                    | 40                     |
| 50 | p.685insA                        | 2 | Insertion   | CBD3 | Taiwanese                                                                 | 2                      |
| 51 | c.678delG (p.Leu227fs)           | 2 | Deletion    | CBD3 | Indian (West)                                                             | 28                     |
| 52 | c.695delC (p.P232Qfs*30)         | 2 | Deletion    | CBD3 | Chinese                                                                   | 7                      |
| 53 | c.748G>A (p.Gly250Arg)           | 2 | Missense    | CBD3 | Chinese                                                                   | 9                      |
| 54 | c.778delC (p.Gln260Asn*2)        | 2 | Deletion    | CBD3 | German                                                                    | 21                     |
| 55 | c.778dupC (p.Gln260Profs*10)     | 2 | Duplication | CBD3 | German                                                                    | 21                     |
| 56 | c.779_780insC (p.Gln260Hisfs*10) | 2 | Insertion   | CBD3 | Greek (Romanian)                                                          | 41                     |
| 57 | c.802_808del (p.Cys268Leufs*4)   | 2 | Deletion    | CBD3 | German                                                                    | 42                     |
| 58 | c.813C>A (p.Cys271*)             | 2 | Nonsense    | CBD3 | Indian (East), Turkish, Indian (West), Thai, German, Indian (South)       | 11, 16, 28, 34, 43, 44 |
| 59 | c.813delC (p.Cys271Trpfs*3)      | 2 | Deletion    | CBD3 | Chinese                                                                   | 32                     |
| 60 | c.815dupT (p.Asn274Glufs*2)      | 2 | Duplication | CBD3 | Pakistani                                                                 | 45                     |
| 61 | c.845delT (p.Leu282Profs*2)      | 2 | Deletion    | CBD3 | Greek, Middle Eastern, Jewish-Iran, Jewish-Iraq, Bulgarian,               | 47, 4, 46, 48          |
| 62 | c.846delC                        | 2 | Deletion    | CBD3 | Iranian, Greek                                                            | 49, 50                 |
| 63 | c.847delC (p.Leu283*)            | 2 | Nonsense    | CBD3 | Iranian, Greek                                                            | 49, 50                 |
| 64 | c.856C>T (p.Gln286*)             | 2 | Nonsense    | CBD3 | Italy, Greek (Crete), N.European, Greek Middle Eastern, Shephardic Jewish | 1, 29, 39, 47, 51      |
| 65 | c.892delC (p.Gln298Lysfs*2)      | 2 | Deletion    | CBD3 | Indian (East), Indian (West)                                              | 11,12                  |
| 66 | c.898_902delAAGTA (p.Lys300*)    | 2 | Deletion    | CBD3 | Chinese                                                                   | 9                      |
| 67 | c.915T>A (p.Cys305*)             | 2 | Nonsense    | CBD3 | Italy                                                                     | 1, 47                  |
| 68 | c.918_931del (p.Ser307Alafs*13)  | 2 | Deletion    | CBD3 | German                                                                    | 39                     |

|     |                                    |   |             |                     |                                            |                  |
|-----|------------------------------------|---|-------------|---------------------|--------------------------------------------|------------------|
| 69  | c.994 G>T (p.Glu332*)              | 2 | Nonsense    | CBD3                | Chinese                                    | 7, 32            |
| 70  | c.985G > C (p.Asp329His)           | 2 | Missense    | CBD3                | Thai                                       | 34               |
| 71  | c.997G>A (p.Gly333Arg)             | 2 | Missense    | Between CBD3 & CBD4 | Indian (South)                             | 44               |
| 72  | c.1057delC                         | 2 | Deletion    | Between CBD3 & CBD4 | Chinese                                    | 52               |
| 73  | c.1063C>T (p.Gln355*)              | 2 | Nonsense    | Between CBD3 & CBD4 | Polish                                     | 53               |
| 74  | c.1073delG (p.Cys358Serfs*5)       | 2 | Deletion    | CBD4                | British, German                            | 39               |
| 75  | c.1136delG (p.Gly379Alafs*2)       | 2 | Deletion    | CBD4                | Italy, Greek                               | 1, 47            |
| 76  | c.1142T>G (p.Ile381Ser)            | 2 | Missense    | CBD4                | Polish                                     | 54               |
| 77  | c.1143_1149del (p.Ser382Trpfs*24)  | 2 | Deletion    | CBD4                | British                                    | 16               |
| 78  | c.1162C>T (p.Q388*)                | 2 | Nonsense    | CBD4                | Chinese                                    | 10, 24           |
| 79  | c.1186G>T (p.Glu396*)              | 2 | Nonsense    | CBD4                | Egyptian                                   | 25               |
| 80  | c.1234G>T (p.Glu412*)              | 2 | Nonsense    | CBD4                | Korean                                     | 55               |
| 81  | c.1285+2T>A                        | 2 | Splice site | CBD4                | German                                     | 21               |
| 82  | c.1285+5G>T                        | 2 | Splice site | CBD4                | Sardinian                                  | 47               |
| 83  | EX2 DEL                            | 2 | Deletion    | CBD1-CBD4           | Chinese                                    | 9                |
| 84  | c.1286-2A>G                        | 3 | Missense    | Between CBD4 & CBD5 | Italian                                    | 15               |
| 85  | c.1292_1293del (p.Cys431Phefs*3)   | 3 | Deletion    | Between CBD4 & CBD5 | Japanese                                   | 3                |
| 86  | c.1340_1343del (p.Gln447Leufs*50)  | 3 | Deletion    | Between CBD4 & CBD5 | Czech, German                              | 4, 56, 57        |
| 87  | c.1366 G>C                         | 3 | Missense    | Between CBD4 & CBD5 | Chinese                                    | 58               |
| 88  | c.1369C>T (p.Gln457*)              | 3 | Nonsense    | Between CBD4 & CBD5 | Turkish                                    | 16               |
| 89  | c.1384_1400del (p.His462Cysfs*30)  | 3 | Deletion    | Between CBD4 & CBD5 | Chinese                                    | 59               |
| 90  | c.1403_1416del (p.A468Gfs*33)      | 3 | Deletion    | Between CBD4 & CBD5 | Chinese                                    | 7                |
| 912 | c.1436delC (p.Pro479Hisfs*19)      | 3 | Deletion    | Between CBD4 & CBD5 | Brazilian                                  | 8                |
| 92  | c.1448_1455del (p.Arg483Serfs*20)  | 3 | Deletion    | CBD5                | Chinese                                    | 32               |
| 93  | c.1449_1456del (p.Arg483Serfs*20)  | 3 | Deletion    | CBD5                | Chinese                                    | 7                |
| 94  | c.1456G>T (p.Ala486Ser)            | 3 | Missense    | CBD5                | Greek                                      | 41               |
| 95  | c.1470C>A (p.Cys490*)              | 3 | Nonsense    | CBD5                | Thai, Taiwanese                            | 34, 35           |
| 96  | c.1475T>C (p.Leu492Ser)            | 3 | Missense    | CBD5                | Italian, Greek, American                   | 1, 47, 60, 61    |
| 97  | c.1492A>T (p.Thr498Ser)            | 3 | Missense    | CBD5                | Chinese                                    | 24               |
| 98  | c.1512dupT (p.Asn505*)             | 3 | Duplication | CBD5                | Sardinian, Mediterranean                   | 18, 62           |
| 99  | c.1514_1515insT (p.Ile506Hisfs*28) | 3 | Insertion   | CBD5                | Sardinian                                  | 14               |
| 100 | c.1516_1517del (p.Ile506Argfs*27)  | 3 | Deletion    | CBD5                | Chinese-Han                                | 17               |
| 101 | c.1518_1521del (p.Glu507Glyfs*16)  | 3 | Deletion    | CBD5                | British, Polish                            | 16, 53           |
| 102 | c.1518_1522del (p.Ile506Metfs*26)  | 3 | Deletion    | CBD5                | Czechs/Slovaks                             | 6                |
| 103 | c.1531C>T (p.Gln511*)              | 3 | Nonsense    | CBD5                | Chinese, Chinese-Han                       | 23, 63           |
| 104 | c.1543+1G>T                        | 3 | Missense    | CBD5                | Italian, Brazilian, Chinese, Greek, Korean | 1, 8, 23, 47, 55 |
| 105 | c.1543+1G>A                        | 3 | Splice site | CBD5                | Italian                                    | 54               |
| 106 | c.1544-2A>G                        | 4 | Splice site | CBD5                | Italian                                    | 15               |
| 107 | c.1544-2A>C                        | 4 | Splice site | CBD5                | Italy                                      | 33               |



|     |                                           |   |             |      |                                                                                                                                      |                                                           |
|-----|-------------------------------------------|---|-------------|------|--------------------------------------------------------------------------------------------------------------------------------------|-----------------------------------------------------------|
| 108 | c.1544G>T (p.Gly515Val)                   | 4 | Missense    | CBD5 | Chinese                                                                                                                              | 63                                                        |
| 109 | c.1544G>A (p.Gly515Asp)                   | 4 | Missense    | CBD5 | Indian (West)                                                                                                                        | 28                                                        |
| 110 | c.1545delT (p.G515Gfs*9)                  | 4 | Nonsense    | CBD5 | Chinese                                                                                                                              | 7                                                         |
| 111 | c.1552_1553delTC<br>(p.Ser518Argfs*15)    | 4 | Deletion    | CBD5 | Chinese                                                                                                                              | 7                                                         |
| 112 | c.1555G>A (p.Val519Met)                   | 4 | Missense    | CBD5 | American                                                                                                                             | 64                                                        |
| 113 | c.1568T>A (p.Leu523*)                     | 4 | Nonsense    | CBD5 | British                                                                                                                              | 38                                                        |
| 114 | c.1594T>C (p.Tyr532His)                   | 4 | Missense    | CBD5 | Scottish                                                                                                                             | 38                                                        |
| 115 | c.1607T>C (p.Val536Ala)                   | 4 | Missense    | CBD5 | North European                                                                                                                       | 39                                                        |
| 116 | c.C>T1616 (p.Pro539Leu)                   | 4 | Missense    | CBD5 | Austria                                                                                                                              | 65                                                        |
| 117 | c.1621G>A (p.Glu541Lys)                   | 4 | Missense    | CBD5 | Greek                                                                                                                                | 66                                                        |
| 118 | c.1630C>T (p.Gln544*)                     | 4 | Nonsense    | CBD5 | Finnish,<br>American                                                                                                                 | 36, 67                                                    |
| 119 | c.1639delC (p.Gln547Argfs*22)             | 4 | Deletion    | CBD5 | Palestinian                                                                                                                          | 46                                                        |
| 120 | c.1646T>C (p.Leu549Pro)                   | 4 | Missense    | CBD5 | Egyptian                                                                                                                             | 25                                                        |
| 121 | c.1646_1652del<br>(p.Gly550Argfs*17)      | 4 | Deletion    | CBD5 | Chinese                                                                                                                              | 68                                                        |
| 122 | c.1672_1673del (p.Asp558Leufs*9)          | 4 | Deletion    | CBD5 | Italian                                                                                                                              | 1, 47                                                     |
| 123 | c.1705_1707+8del                          | 4 | Deletion    | CBD6 | British                                                                                                                              | 16                                                        |
| 124 | c.1707+2dupT                              | 4 | Splice site | CBD6 | Turkish, Greek, Italian                                                                                                              | 1, 16, 47, 69                                             |
| 125 | c.1707+5G>A                               | 4 | Splice site | CBD6 | Egyptian                                                                                                                             | 25                                                        |
| 126 | c.1707+11dupGT                            | 4 | Splice site | CBD6 | Indian (North)                                                                                                                       | 71                                                        |
| 127 | c.1708-?_1946+?del                        |   | Ex5-6del    | CBD6 | Danish                                                                                                                               | 72                                                        |
| 128 | c.1708-1G>C                               | 5 | Splice site | CBD6 | Chinese, Indian<br>(East), British,<br>Chinese, Spanish,<br>Thai, Taiwanese,<br>Greek, Cypriot,<br>Indian, Chinese-Han,<br>Bulgarian | 5, 9, 11, 16,<br>24, 26, 34, 35,<br>41, 48, 49, 50,<br>70 |
| 129 | c.1708-2A>G                               | 5 | Splice site | CBD6 | Turkish (Bulgaria)                                                                                                                   | 73                                                        |
| 130 | c.1708-5T>G                               | 5 | Splice site | CBD6 | Chinese-Han, Chinese<br>(Hong Kong),<br>Japanese                                                                                     | 5, 22, 74                                                 |
| 131 | c.1711-1G>C                               | 5 | Splice Site | CBD6 | Indian                                                                                                                               | 49, 50                                                    |
| 132 | c.1716delG (p.Met573fs)                   | 5 | Deletion    | CBD6 | Indian (West)                                                                                                                        | 28                                                        |
| 133 | c.1721_1722insTGAC<br>(p.His580Serfs*105) | 5 | Insertion   | CBD6 | Chinese                                                                                                                              | 68                                                        |
| 134 | c.1743_1744dup (p.Ile582Thrfs*2)          | 5 | Duplication | CBD6 | Italian                                                                                                                              | 15                                                        |
| 135 | c.1744_1745del (p.Ile582Argfs*25)         | 5 | Deletion    | CBD6 | British, N. European,<br>British, Italian, French                                                                                    | 16, 18, 40, 49,<br>50, 62                                 |
| 136 | c.1745_1746 delTA                         | 5 | Deletion    | CBD6 | Chinese                                                                                                                              | 9                                                         |
| 137 | c.1747_1748insT<br>(p.Asn581Serfs*232)    | 5 | Insertion   | CBD6 | Indian                                                                                                                               | 49, 50                                                    |
| 138 | c.1748_1749del<br>(p.Glu583Valfs*24)      | 5 | Deletion    | CBD6 | Italian                                                                                                                              | 15                                                        |
| 139 | c.1771G>A (p.Gly591Ser)                   | 5 | Missense    | CBD6 | Indian (East)                                                                                                                        | 75, 76                                                    |
| 140 | c.1772G>A (p.Gly591Asp)                   | 5 | Missense    | CBD6 | Mediterranean,<br>Egyptian, European,<br>Italian                                                                                     | 18, 25, 38, 60,<br>61, 62                                 |

|     |                                           |   |             |                     |                                                                                                   |                                 |
|-----|-------------------------------------------|---|-------------|---------------------|---------------------------------------------------------------------------------------------------|---------------------------------|
| 141 | c.1782delT (p.Tyr594*)                    | 5 | Nonsense    | CBD6                | Italian, Mediterranean, , Greek                                                                   | 14, 18, 41, 62                  |
| 142 | c.1783G>A (p.Ala595Thr)                   | 5 | Missense    | CBD6                | Indian (Eastern and western)                                                                      | 13                              |
| 143 | c.1739delA (p.His580Profs)                | 5 | Deletion    | CBD6                | Italy                                                                                             | 33                              |
| 144 | c.1803delC (p.Ser602Alafs*46)             | 5 | Deletion    | CBD6                | Chinese-Han                                                                                       | 17                              |
| 145 | c.1810G>C (p.Ala604Pro)                   | 5 | Missense    | CBD6                | British                                                                                           | 38, 60                          |
| 146 | c.T>G1817 (p.Val606Gly)                   | 5 | Missense    | CBD6                | Chinese                                                                                           | 10                              |
| 147 | c.1820dupA (p.Phe608Valfs*2)              | 5 | Duplication | CBD6                | Chinese                                                                                           | 68                              |
| 148 | c.1823_1825del (p.Phe607_Asp608delinsTyr) | 5 | Deletion    | CBD6                | Italian                                                                                           | 1, 47                           |
| 149 | c.1831G>A (p.Glu611Lys)                   | 5 | Missense    | CBD6                | Chinese                                                                                           | 32                              |
| 150 | c.1846C (p.Arg616Trp)                     | 5 | Missense    | CBD6                | German                                                                                            | 56, 57, 60                      |
| 151 | c.1847G>A (p.Arg616Gln)                   | 5 | Missense    | CBD6                | British, Mediterranean, Bulgarian, Polish, Indian (South), Chinese-Han, Bulgarian                 | 16, 23, 27, 44, 53, 70          |
| 152 | c.1747delAT                               | 5 | Deletion    | CBD6                | Britian                                                                                           | 49, 50                          |
| 153 | c.1849dupG (p.Asp617Glyfs*7)              | 5 | Duplication | CBD6                | Indian (North)                                                                                    | 71                              |
| 154 | c.1849delG (p.Asp617Ilefs)                | 5 | Deletion    | CBD6                | Italy                                                                                             | 33                              |
| 155 | c.1869+1_4delGT AA                        | 6 | Deletion    | CBD6                | Indian (West)                                                                                     | 28                              |
| 156 | c.1870-2A>G                               | 6 | Splice site | CBD6                | Bulgarian                                                                                         | 73                              |
| 157 | c.1870-2delA                              | 6 | Splice site | CBD6                | Korean                                                                                            | 77                              |
| 158 | c.1875-1876insAATT (p.Gly626fs)           | 6 | Insertion   | CBD6                | Chinese                                                                                           | 78                              |
| 159 | c.1877G>C (p.Gly626Ala)                   | 6 | Missense    | CBD6                | Sardinian, Italian, Turkish, Jewish, N. European, Middle Eastern, Mediterranean, Bulgarian        | 4, 14, 18, 51, 62, 70           |
| 160 | c.1883_1884del (p.His628Argfs*126)        | 6 | Deletion    | CBD6                | Turkish                                                                                           | 14                              |
| 161 | c.1915C>T (p.His639Tyr)                   | 6 | Missense    | Between CBD6 & TMS1 | Polish                                                                                            | 53                              |
| 162 | c.1922T>C (p.Leu641Ser)                   | 6 | Missense    | Between CBD6 & TMS1 | Scottish, Czechs/Slovaks                                                                          | 6, 38                           |
| 163 | c.1924G>C (p.Asp642His)                   | 6 | Missense    | Between CBD6 & TMS1 | Italian, Egyptian                                                                                 | 1, 25, 47                       |
| 164 | c.1927ins10                               | 6 | Insertion   | Between CBD6 & TMS1 | German                                                                                            | 79                              |
| 165 | c.1934T>G (p.Met645Arg)                   | 6 | Missense    | Between CBD6 & TMS1 | Jewish, Ashkenazi Jewish, Italian, Spanish- Grand Canaria, Spanish, Spanish (Columbian), American | 1, 4, 8, 15, 26, 36, 46, 47, 80 |
| 166 | c.1946+2T>G                               | 6 | Splice site | Between CBD6 & TMS1 | Indian (west)                                                                                     | 28                              |
| 167 | c.1946+5dupG                              | 6 | Splice site | Between CBD6 & TMS1 | British                                                                                           | 16                              |
| 168 | c.1946+9A>G                               | 6 | Splice site | Between CBD6 & TMS1 | Chinese-Han                                                                                       | 23                              |
| 169 | IVS6+1G>A                                 | 6 | Splice site | Between CBD6 & TMS1 | Chinese                                                                                           | 81                              |
| 170 | c.1947-4C>T                               | 7 | Splice site | Between CBD6 & TMS1 | Korean                                                                                            | 77                              |
| 171 | c.1947-2A>G                               | 7 | Splice site | Between CBD6 & TMS1 | Chilean                                                                                           | 38                              |
| 172 | c.1947-1G>C                               | 7 | Splice site | Between CBD6 & TMS1 | French                                                                                            | 40                              |
| 173 | c.1947delG                                | 7 | Deletion    | Between CBD6 &      | Central Japan                                                                                     | 32                              |

|     |                                                       |   |                    |                     |                                                                                                 |                               |
|-----|-------------------------------------------------------|---|--------------------|---------------------|-------------------------------------------------------------------------------------------------|-------------------------------|
|     |                                                       |   |                    | TMS1                |                                                                                                 |                               |
| 174 | c.1950G>A (p.Trp650*)                                 | 7 | Nonsense           | Between CBD6 & TMS1 | Chinese-Han                                                                                     | 5                             |
| 175 | c.1958C>A (p.Ser653Tyr)                               | 7 | Missense           | Between CBD6 & TMS1 | Polish                                                                                          | 53                            |
| 176 | c.1963delC (p.Leu655Cysfs*13)                         | 7 | Deletion           | TMS1                | Indian (South)                                                                                  | 44                            |
| 177 | c.1968C>A (p.Cys656*)                                 | 7 | Nonsense           | TMS1                | Korean, Chinese                                                                                 | 59, 82                        |
| 178 | c.1969A>C (p.Ser657Arg)                               | 7 | Missense           | TMS1                | North European                                                                                  | 39                            |
| 179 | c.1994T>G (p.Met665Arg)                               | 7 | Missense           | TMS1                | Chinese                                                                                         | 9                             |
| 180 | c.1995G>A (p.Met665Ile)                               | 7 | Missense           | TMS1                | Albanian                                                                                        | 1, 47                         |
| 181 | c.2004_2006del (p.Met668del)                          | 7 | Deletion           | TMS1                | Japanese                                                                                        | 3                             |
| 182 | c.2012_2013 insATAT                                   | 7 | Insertion          | TMS1                | Chinese                                                                                         | 9                             |
| 183 | c.2007_2013del (p.Tyr670*)                            | 7 | Deletion           | TMS1                | Icelandic, British                                                                              | 16, 49, 50                    |
| 184 | c.2008_2013del (p.Tyr670_Met671del)                   | 7 | Deletion           | TMS1                | German                                                                                          | 42                            |
| 185 | c.2027A>T (p.Asn676Ile)                               | 7 | Missense           | Between TMS1 & TMS2 | Hungarian                                                                                       | 83                            |
| 186 | c.2035delC (p.His679Thrfs*17)                         | 7 | Deletion           | Between TMS1 & TMS2 | Sardinian                                                                                       | 15                            |
| 187 | c.2043delC (p.S681Sfs*15)                             | 7 | Deletion           | Between TMS1 & TMS2 | Chinese                                                                                         | 7                             |
| 188 | c.2049_2053delCCTGGinsTTTC (p.Val683_Leu684delinsVal) | 7 | Deletion-Insertion | Between TMS1 & TMS2 | Egyptian                                                                                        | 84                            |
| 189 | c.2069C>T (p.Pro690Leu)                               | 7 | Missense           | TMS2                | Spanish                                                                                         | 26                            |
| 190 | c.2071G>A (p.Gly691Arg)                               | 7 | Missense           | TMS2                | Turkish, German, Indian (West)                                                                  | 1, 28, 47                     |
| 191 | p.Leu692Pro                                           | 7 | Missense           | TMS2                | Chinese                                                                                         | 85                            |
| 192 | 2075T>C (p.Leu692Pro)                                 | 7 | Missense           | TMS2                | Chinese                                                                                         | 86                            |
| 193 | c.2077T>C (p.Ser693Pro)                               | 7 | Missense           | TMS2                | Chinese-Han                                                                                     | 23                            |
| 194 | c.2078C>G (p.Ser693Cys)                               | 7 | Missense           | TMS2                | Chinese-Han                                                                                     | 23                            |
| 195 | c.2078C>A (p.Ser693Tyr)                               | 7 | Missense           | TMS2                | Hungarian                                                                                       | 83                            |
| 196 | c.2097_2099del (p.Phe700del)                          | 7 | Deletion           | TMS2                | Chinese-Han                                                                                     | 17                            |
| 197 | c.2101_2102del (p.Ile701Leufs*53)                     | 7 | Deletion           | TMS2                | Greek                                                                                           | 41                            |
| 198 | c.2108G>A (p.Cys703Tyr)                               | 7 | Missense           | TMS2                | British, Egyptian                                                                               | 25, 38                        |
| 199 | c.2115delGT (p.Phe705Pro-fs)                          | 7 | Deletion           | TMS2                | Indian                                                                                          | 71                            |
| 200 | c.2116_2117del (p.Val706Profs*48)                     | 7 | Deletion           | TMS2                | Indian (North)                                                                                  | 71                            |
| 201 | c.2120A>G (p.Gln707Arg)                               | 7 | Missense           | TMS2                | Chinese                                                                                         | 78                            |
| 202 | c.2121+3A>T                                           | 7 | Splice Site        | TMS2                | Chinese                                                                                         | 78                            |
| 203 | c.2121+3A>G                                           | 7 | Splice site        | TMS2                | Polish, Italian                                                                                 | 53, 87                        |
| 204 | c.2121+127C>A                                         | 7 | Splice site        | TMS2                | Indian                                                                                          | 75, 76                        |
| 205 | c.2122-8T>G                                           | 8 | Splice site        | TMS2                | Italian, Sardinian                                                                              | 69, 88                        |
| 206 | c.2123T>C (p.Leu708Pro)                               | 8 | Missense           | TMS2                | American, Spanish-Grand Canaria, Brazilian                                                      | 4, 8, 80                      |
| 207 | c.2128G>C (p.Gly710Arg)                               | 8 | Missense           | TMS2                | Italian                                                                                         | 19                            |
| 208 | c.2128G>A (p.Gly710Ser)                               | 8 | Missense           | TMS2                | N. European, Middle Eastern, Italian, Middle Eastern, German, Hungarian, Indian (East), Chinese | 4, 9, 11, 51, 56, 57, 60, 89, |
| 209 | c.2129G>C (p.Gly710Ala)                               | 8 | Missense           | TMS2                | German                                                                                          | 43                            |

|     |                                   |   |             |                     |                                   |                |
|-----|-----------------------------------|---|-------------|---------------------|-----------------------------------|----------------|
| 210 | p.Gly710Cys                       | 8 | Missense    | TMS2                | Chinese                           | 30             |
| 211 | c.2129G>T (p.Gly710Val)           | 8 | Missense    | TMS2                | Italian                           | 38             |
| 212 | c.2131G>A (p.Gly711Arg)           | 8 | Missense    | TMS2                | Italian                           | 18, 62         |
| 213 | c.2131G>T (p.Gly711Trp)           | 8 | Missense    | TMS2                | Pakistani                         | 16             |
| 214 | c.2132G>A (p.Gly711Glu)           | 8 | Missense    | TMS2                | Italian                           | 19             |
| 215 | c.2138A>G (p.Tyr713Cys)           | 8 | Missense    | TMS2                | Italian                           | 19             |
| 216 | c.2143T>C (p.Tyr715His)           | 8 | Missense    | TMS2                | Hungarian                         | 83             |
| 217 | c.2145C>A (p.Tyr715*)             | 8 | Missense    | TMS2                | Indian (South)                    | 44             |
| 218 | c.2145C>T (p.Tyr715Tyr)           | 8 | Silent      | TMS2                | Indian (West)                     | 28             |
| 219 | c.2157C>A (p.Y719*)               | 8 | Nonsense    | TMS2                | Chinese                           | 7, 30          |
| 220 | c.2160delA (p.Lys720Asnfs*3)      | 8 | Deletion    | Between TMS2 & TMS3 | Italian                           | 49, 50         |
| 221 | c.2161T>C (p.Ser721Pro)           | 8 | Missense    | Between TMS2 & TMS3 | Spanish                           | 69             |
| 222 | c.2165dupT (p.Arg723Glu*32)       | 8 | Duplication | Between TMS2 & TMS3 | Japanese, Chinese                 | 3, 68          |
| 223 | c.2180C>T (p.Ala727Val)           | 8 | Missense    | Between TMS2 & TMS3 | Chinese                           |                |
| 224 | c.2180C>A (p.Ala727Asp)           | 8 | Missense    | Between TMS2 & TMS3 | Unknown                           | 54             |
| 225 | p.Asn728Ser                       | 8 | Missense    | Between TMS2 & TMS3 | Chinese                           | 85             |
| 226 | c.2185A>G (p.Met729Val)           | 8 | Missense    | Between TMS2 & TMS3 | Korean                            | 55             |
| 227 | c.2189A>G (p.Asp730Gly)           | 8 | Missense    | Between TMS2 & TMS3 | Indian (West)                     | 28             |
| 228 | c.2192T>A (p.Val731Glu)           | 8 | Missense    | TMS3                | Chinese                           | 68             |
| 229 | c.2195T>A (p.Leu732His)           | 8 | Missense    | TMS3                | Chinese                           | 10             |
| 230 | c.2195T>C (p.Leu732Pro)           | 8 | Missense    | TMS3                | Chinese                           | 10             |
| 231 | c.2203_2231del (p.Leu735Serfs*10) | 8 | Deletion    | TMS3                | Japanese                          | 3              |
| 232 | c.2210C>G (p.Thr737Arg)           | 8 | Missense    | TMS3                | Czech/Slovak                      | 6, 90          |
| 233 | c.2222A>G (p.Tyr741Cys)           | 8 | Missense    | TMS3                | German                            | 43             |
| 234 | c.2223T>A (p.Tyr741*)             | 8 | Nonsense    | TMS3                | Italian                           | 18, 62         |
| 235 | c.2227delT (p.Tyr743fs)           | 8 | Deletion    | TMS3                | Indian (West)                     | 28             |
| 236 | c.2224insA (p.Val742Aspfs*13)     | 8 | Insertion   | TMS3                | Indian (North)                    | 71             |
| 237 | c.2230T>C (p.Ser744Pro)           | 8 | Missense    | TMS3                | Arabic (Kuwait), Saudi Arabian    | 16, 91         |
| 238 | c.2231T>C (p.Ser744Pro)           | 8 | Missense    | TMS3                | Egyptian                          | 84             |
| 239 | c.2231C>T (p.Ser744Phe)           | 8 | Missense    | TMS3                | Chinese                           | 9              |
| 240 | c.2239A>T (p.Ile747Phe)           | 8 | Missense    | TMS3                | Sardinian                         | 1, 47          |
| 241 | c.2258insC (p.Ala753*)            | 8 | Insertion   | TMS3                | Indian                            | 71             |
| 242 | c.2258dupC (p.Glu754*)            | 8 | Nonsense    | TMS3                | Indian (North)                    | 71             |
| 243 | c.2267C>G (p.Ala756Gly)           | 8 | Missense    | Between TMS3 & TMS4 | Chinese                           | 38             |
| 244 | c.2267C>T (p.Ala756Val)           | 8 | Missense    | Between TMS3 & TMS4 | Italian                           | 92             |
| 245 | c.2273G>T (p.Arg758Met)           | 8 | Missense    | Between TMS3 & TMS4 | Chinese                           | 93             |
| 246 | c.2279C>T (p.Pro760Leu)           | 8 | Missense    | Between TMS3 & TMS4 | German, European (German, Polish) | 56, 57, 60, 94 |
| 247 | c.2280_2301del (p.Val761Profs*39) | 8 | Deletion    | Between TMS3 & TMS4 | British                           | 16             |

|     |                                        |   |             |      |                                                                                                                                                                                                                                                                                                                                                  |                                                                                                                   |
|-----|----------------------------------------|---|-------------|------|--------------------------------------------------------------------------------------------------------------------------------------------------------------------------------------------------------------------------------------------------------------------------------------------------------------------------------------------------|-------------------------------------------------------------------------------------------------------------------|
| 248 | c.2288T>A (p.Phe763Tyr)                | 8 | Missense    | TMS4 | Finnish                                                                                                                                                                                                                                                                                                                                          | 40                                                                                                                |
| 249 | p.Phe764Leu                            | 8 | Missense    | TMS4 | Chinese                                                                                                                                                                                                                                                                                                                                          | 30                                                                                                                |
| 250 | c.2292_2312del<br>(p.Asp765_Phe771del) | 8 | Deletion    | TMS4 | Indian                                                                                                                                                                                                                                                                                                                                           | 95                                                                                                                |
| 251 | c.2293G>A (p.Asp765Asn)                | 8 | Missense    | TMS4 | Italian, Yemenite-Jewish, Moroccan, British, German, Polish, Egyptian                                                                                                                                                                                                                                                                            | 14, 16, 25, 46, 53, 56, 57, 60, 96, 97, 98                                                                        |
| 252 | c.2293G>C (p.Asp765His)                | 8 | Missense    | TMS4 | Italy                                                                                                                                                                                                                                                                                                                                            | 33                                                                                                                |
| 253 | c.2294A>G (p.Asp765Gly)                | 8 | Missense    | TMS4 | Chinese-Han, Chinese                                                                                                                                                                                                                                                                                                                             | 17, 24                                                                                                            |
| 254 | c.2295A>C (p.Met769Leu)                | 8 | Missense    | TMS4 | Hungarian                                                                                                                                                                                                                                                                                                                                        | 83                                                                                                                |
| 255 | c.2296A>C (p.Thr766Pro)                | 8 | Missense    | TMS4 | Chinese                                                                                                                                                                                                                                                                                                                                          | 68                                                                                                                |
| 256 | c.2296dupA (p.Thr766Asnfs*29)          | 8 | Duplication | TMS4 | Brazilian                                                                                                                                                                                                                                                                                                                                        | 8                                                                                                                 |
| 257 | c.2297C>T (p.Thr766Met)                | 8 | Missense    | TMS4 | Chinese, British                                                                                                                                                                                                                                                                                                                                 | 38, 68                                                                                                            |
| 258 | c.2297C>G (p.Thr766Arg)                | 8 | Missense    | TMS4 | British                                                                                                                                                                                                                                                                                                                                          | 99                                                                                                                |
| 259 | c.2298_2299insC (p.Pro767Profs)        | 8 | Insertion   | TMS4 | Austrian                                                                                                                                                                                                                                                                                                                                         | 65                                                                                                                |
| 260 | c.2299C >T                             | 8 | Unknown     | TMS4 | Thai                                                                                                                                                                                                                                                                                                                                             | 34                                                                                                                |
| 261 | c.2299insG (p.Pro767Argfs*28)          | 8 | Insertion   | TMS4 | Mediterranean, Greek                                                                                                                                                                                                                                                                                                                             | 1, 47                                                                                                             |
| 262 | 2299insC                               | 8 | Insertion   | TMS4 | Japanese (central Japan)                                                                                                                                                                                                                                                                                                                         | 3, 32                                                                                                             |
| 263 | c.2302insT                             | 8 | Insertion   | TMS4 | American                                                                                                                                                                                                                                                                                                                                         | 36                                                                                                                |
| 264 | c.2302insC                             | 8 | Insertion   | TMS4 | Italian, British                                                                                                                                                                                                                                                                                                                                 | 49, 50                                                                                                            |
| 265 | c.2303C>A (p.Pro768His)                | 8 | Missense    | TMS4 | Korean                                                                                                                                                                                                                                                                                                                                           | 82                                                                                                                |
| 266 | c.2303C>T (p.Pro768Leu)                | 8 | Missense    | TMS4 | Indian (South), Spanish                                                                                                                                                                                                                                                                                                                          | 44, 100                                                                                                           |
| 267 | c.2304dupC (p.Met769Hisfs*26)          | 8 | Duplication | TMS4 | Sardinian, Italian, Turkish, Albanian, Italian, British, N. European, Japanese, Russian, American, Taiwanese, French, British, Mediterranean, Sardinian, Japanese, Taiwanese, Greek, Cypriot, German, Korean, Chinese-Han, Brazilian, Polish, Indian (East), Spanish, Bulgarian, Chinese, Egyptian, Sardinian, Czech, Yugoslavian, Indian (West) | 3, 4, 8, 11, 14, 16, 17, 18, 25, 26, 27, 28, 35, 41, 48, 49, 50, 53, 56, 57, 62, 63, 70, 82, 88, 90, 97, 101, 102 |
| 268 | c.2304delC (p.Met769Cysfs*38)          | 8 | Deletion    | TMS4 | Korean, Chinese (Hong Kong)                                                                                                                                                                                                                                                                                                                      | 77, 103                                                                                                           |
| 269 | c.2304_2305 insC                       | 8 | Insertion   | TMS4 | Chinese                                                                                                                                                                                                                                                                                                                                          | 9                                                                                                                 |
| 270 | c.2305A>G (p.Met769Val)                | 8 | Missense    | TMS4 | British, Spanish-Grand Canaria, German, Chinese-Han, Italian                                                                                                                                                                                                                                                                                     | 5, 15, 16, 49, 50, 56, 57, 60, 80, 98                                                                             |
| 271 | c.2306T>G (p.Met769Arg)                | 8 | Missense    | TMS4 | British                                                                                                                                                                                                                                                                                                                                          | 16                                                                                                                |
| 272 | c.2307G>T (p.Met769Ile)                | 8 | Missense    | TMS4 | Japanese                                                                                                                                                                                                                                                                                                                                         | 104                                                                                                               |
| 273 | c.2308C>T (p.Leu770Phe)                | 8 | Missense    | TMS4 | Chinese                                                                                                                                                                                                                                                                                                                                          | 9                                                                                                                 |
| 274 | c.2310C>G (p.Leu770Leu)                | 8 | Silent      | TMS4 | Chinese                                                                                                                                                                                                                                                                                                                                          | 9                                                                                                                 |

|     |                                                 |    |                    |                         |                                                                                                       |                                                   |
|-----|-------------------------------------------------|----|--------------------|-------------------------|-------------------------------------------------------------------------------------------------------|---------------------------------------------------|
| 275 | c.2311C > G (Leu770Leu)                         | 8  | Silent             | TMS4                    | Iranian                                                                                               | 105                                               |
| 276 | c.2326C>G (p.Leu776Val)                         | 8  | Missense           | TMS4                    | British                                                                                               | 49, 50, 60, 96                                    |
| 277 | c.2327T>C (p.Leu776Pro)                         | 8  | Missense           | TMS4                    | Polish                                                                                                | 53                                                |
| 278 | c.2332C>G (p.Arg778Gly)                         | 8  | Missense           | TMS4                    | Turkish, Greek, Mediterranean, Bulgarian, Polish, Hungarian, Bulgarian, Czech                         | 1, 14, 18, 47, 53, 62, 70, 83, 90                 |
| 279 | c.2332C>T (p.Arg778Trp)                         | 8  | Missense           | TMS4                    | American, Italian, Sardinian, British, Sardinian, Spanish-Grand Canaria, Japanese, Bulgarian, Italian | 1, 4, 16, 15, 18, 47, 62, 70, 80, 96, 104         |
| 280 | c.2333G>A (p.Arg778Gln)                         | 8  | Missense           | TMS4                    | Taiwanese, Chinese-Han, Chinese, Italian, Korean, Indian (West), Chinese                              | 5, 9, 15, 28, 55, 60, 68, 96, 106                 |
| 281 | c.2333G>T (p.Arg778Leu)                         | 8  | Missense           | TMS4                    | Japanese, Chinese, Chinese-Han, Chinese - Han, Hui, Thai, Taiwanese, Korean                           | 3, 5, 9, 17, 24, 34, 49, 50, 60, 77, 96, 106, 107 |
| 282 | c.2335T>G (p.Trp779Gly)                         | 8  | Missense           | TMS4                    | Iranian                                                                                               | 108, 109                                          |
| 283 | c.2335T>G (p.Trp779Gly)                         | 8  | Missense           | TMS4                    | Austrian                                                                                              | 65                                                |
| 284 | c.2336G>A (p.Trp779*)                           | 8  | Nonsense           | TMS4                    | N. European, Middle Eastern, Anglo Saxon, German, Polish, Eritrean, Czech                             | 1, 4, 15, 47, 49, 53, 56, 57, 60, 90              |
| 285 | c.2336G>A (p.Trp779*)                           | 8  | Nonsense           | TMS4                    | North European                                                                                        | 54                                                |
| 286 | c.2341G>A (p.Glu781Lys)                         | 8  | Missense           | TMS4                    | Chinese                                                                                               | 7                                                 |
| 287 | c.2355+4A>G                                     | 8  | Splice site        | TMS4                    | N. European (French Canadian)                                                                         | 39                                                |
| 288 | IVS9-1(G>A)                                     | 9  | Splice site        | TMS4                    | Indian                                                                                                | 71                                                |
| 289 | c.2356-1g>c                                     | 9  | Splice site        | Between TMS4 & A-domain | Chinese                                                                                               | 7                                                 |
| 290 | c.2356-2A>G                                     | 9  | Splice site        | Between TMS4 & A-domain | Chinese                                                                                               | 63                                                |
| 291 | c.2363delC (p.Thr788Thr-fs)                     | 9  | Deletion           | Between TMS4 & A-domain | Indian                                                                                                | 71                                                |
| 292 | c.2363C >T (p.Thr788Ile)                        | 9  | Missense           | Between TMS4 & A-domain | Turkish                                                                                               | 110                                               |
| 293 | c.2363C>T (p.Thr788Ile)                         | 9  | Missense           | Between TMS4 & A-domain | Turkish                                                                                               | 105, 111                                          |
| 294 | c.2364delC (p.Ser789Glnfs*18)                   | 9  | Deletion           | Between TMS4 & A-domain | Indian (North)                                                                                        | 71                                                |
| 295 | c.2383C>T (p.Leu795Phe)                         | 9  | Missense           | Between TMS4 & A-domain | Italian, Indian (West), Indian (South)                                                                | 4, 28, 44                                         |
| 296 | c.2384T>G (p.Leu795Arg)                         | 9  | Missense           | Between TMS4 & A-domain | British                                                                                               | 16                                                |
| 297 | c.2391_2393del (p.Leu798_Tyr801delinsGlnAlaThr) | 9  | Deletion           | Between TMS4 & A-domain | Spanish                                                                                               | 26                                                |
| 298 | c.2407G>A (p.Ala803Thr)                         | 9  | Missense           | Between TMS4 & A-domain | Japanese                                                                                              | 112                                               |
| 299 | c.2424insA (p.Gly809Argfs*2)                    | 9  | Insertion          | Between TMS4 & A-domain | Chinese-Han                                                                                           | 23                                                |
| 300 | p.Asp811Gly                                     | 9  | Missense           | Between TMS4 & A-domain | Chinese                                                                                               | 30                                                |
| 301 | c.2438_2440delinsAT (p.Leu813Tyrfs*60)          | 9  | Deletion/Insertion | Between TMS4 & A-domain | Brazilian                                                                                             | 8                                                 |
| 302 | c.2447+1G>T                                     | 9  | Splice site        | Between TMS4 & A-domain | Mediterranean                                                                                         | 27                                                |
| 303 | c.2447+5G>T                                     | 9  | Splice site        | Between TMS4 & A-domain | Chinese (Hong Kong), Italian, Chinese-Han                                                             | 22, 23, 87                                        |
| 304 | c.2447+2T>A                                     | 9  | Splice site        | Between TMS4 & A-domain | Dutch/German                                                                                          | 113                                               |
| 305 | c.2448G>T (p.Arg816Ser)                         | 9  | Missense           | Between TMS4 & A-domain | Austrian                                                                                              | 65                                                |
| 306 | c.2448-2A>G                                     | 10 | Missense           | Between TMS4 & A-domain | Czech/Slovak                                                                                          | 6                                                 |
| 307 | c.2448-1G>A                                     | 10 | Missense           | Between TMS4 & A-domain | Indian (North)                                                                                        | 71                                                |

|     |                                   |    |             |                         |                                                                                                                                       |                                                        |
|-----|-----------------------------------|----|-------------|-------------------------|---------------------------------------------------------------------------------------------------------------------------------------|--------------------------------------------------------|
|     |                                   |    |             | A-domain                |                                                                                                                                       |                                                        |
| 308 | c.2450delA ( p.Glu817fs)          | 10 | Deletion    | Between TMS4 & A-domain | Egyptian                                                                                                                              | 84                                                     |
| 309 | c.2463dupC (p.Met822Hisfs*32)     | 10 | Duplication | Between TMS4 & A-domain | Korean                                                                                                                                | 82                                                     |
| 310 | c.2463delC (p.Met822Trpfs*51)     | 10 | Deletion    | Between TMS4 & A-domain | Mediterranean, Italian, Mediterranean, American, Mediterranean                                                                        | 14, 15, 18, 36, 62                                     |
| 311 | c.2464dupA (p.Met822Asnfs*32)     | 10 | Duplication | Between TMS4 & A-domain | Chinese-Han                                                                                                                           | 17                                                     |
| 312 | c.2480G>C (p.Arg827Pro)           | 10 | Missense    | Between TMS4 & A-domain | Italian                                                                                                                               | 15                                                     |
| 313 | (p.Lys832Arg)                     | 10 | Missense    | Between TMS4 & A-domain | Taiwanese                                                                                                                             | 2                                                      |
| 314 | c.2497dupG (p.Val833Glyfs*21)     | 10 | Duplication | Between TMS4 & A-domain | India (East)                                                                                                                          | 11, 12                                                 |
| 315 | c.2506G>A (p.Gly836Arg)           | 10 | Missense    | A-domain                | Chinese                                                                                                                               | 9                                                      |
| 316 | c.2507G>A (p.Gly836Glu)           | 10 | Missense    | A-domain                | Moroccan                                                                                                                              | 33                                                     |
| 317 | c.2509G>T(p.Gly837*)              | 10 | Nonsense    | A-domain                | Chinese                                                                                                                               | 24                                                     |
| 318 | c.2510delG (p.Gly837Glufs*35)     | 10 | Deletion    | A-domain                | Chinese                                                                                                                               | 32                                                     |
| 319 | c.2513delA (p.Lys838Serfs*35)     | 10 | Deletion    | A-domain                | Japanese, Korean                                                                                                                      | 82, 101                                                |
| 320 | c.2519C>T (p.Pro840Leu)           | 10 | Missense    | A-domain                | Italian, Turkish, Hungarian, Chinese                                                                                                  | 1, 18, 24, 47, 62, 83                                  |
| 321 | c.2527G>A (p.Gly843Arg)           | 10 | Missense    | A-domain                | Moroccan                                                                                                                              | 40                                                     |
| 322 | c.2524G>A (p.Asp842Asn)           | 10 | Missense    | A-domain                | Chinese (Hong Kong), Chinese-Han, Indian (West)                                                                                       | 22, 23, 28,                                            |
| 323 | c.2532delA (p.Val845Serfs*28)     | 10 | Deletion    | A-domain                | Italy, Turkey, Albania, German, Greek, Italian, Egyptian, Mediterranean, Greek, Cypriot, Polish, Bulgarian, Bosnian, Slovenian, Czech | 1, 14, 15, 18, 25, 43, 47, 48, 53, 62, 70, 90, 92, 105 |
| 324 | c.2549C>T (p.Thr850Ile)           | 10 | Missense    | A-domain                | Chinese                                                                                                                               | 9, 52                                                  |
| 325 | c.2561A>G (p.Glu854Gly)           | 10 | Missense    | A-domain                | Chinese                                                                                                                               | 9                                                      |
| 326 | c.2564C>A (p.Ser855Tyr)           | 10 | Missense    | A-domain                | Indian (East and West), Chinese                                                                                                       | 13, 78                                                 |
| 327 | c.2570T>C (p.Ile857Thr)           | 10 | Missense    | A-domain                | Italian, Turkish, French, Hungarian                                                                                                   | 14, 40, 83 83                                          |
| 328 | c.2572A>G (p.Thr858Ala)           | 10 | Missense    | A-domain                | Italian                                                                                                                               | 15                                                     |
| 329 | c.2575+1G>C                       | 10 | Splice site | A-domain                | British, North European                                                                                                               | 49, 50                                                 |
| 330 | c.2575+2T>C                       | 10 | Splice site | A-domain                | German                                                                                                                                | 56                                                     |
| 331 | c.2551delA (p.Met851Trpfs*22)     | 10 | Deletion    | A-domain                | Saudi Arabian                                                                                                                         | 54                                                     |
| 332 | c.2576+1G>C                       | 10 | Splice site | A-domain                | British                                                                                                                               | 49, 50                                                 |
| 333 | IVS11+2T>A                        | 11 | Splice site | A-domain                | American                                                                                                                              | 36                                                     |
| 334 | IVS11-2A>G                        | 11 | Splice site | A-domain                | American                                                                                                                              | 36                                                     |
| 335 | c.2581G>A (p.Ala861Thr)           | 11 | Missense    | A-domain                | Chinese                                                                                                                               | 38                                                     |
| 336 | c.2582_2583insG (p.Met862Hisfs*5) | 11 | Insertion   | A-domain                | Indian (North)                                                                                                                        | 71                                                     |
| 337 | c.2549C>T                         | 11 | Missense    | A-domain                | Thai                                                                                                                                  | 34                                                     |
| 338 | c.2593_2594 insGTCA               | 11 | Insertion   | A-domain                | Chinese                                                                                                                               | 9<br>81                                                |
| 339 | c.2191T->G (p.V864G)              | 11 | Missense    | A-domain                | Sardinia                                                                                                                              | 33                                                     |
| 340 | c.2605G>A (p.Gly869Arg)           | 11 | Missense    | Between A-              | Chinese                                                                                                                               | 9                                                      |

|     |                                         |    |             |                         |                                                                                |                                    |
|-----|-----------------------------------------|----|-------------|-------------------------|--------------------------------------------------------------------------------|------------------------------------|
|     |                                         |    |             | domain &TMS5            |                                                                                |                                    |
| 341 | c.2606G>T (p.Gly869Val)                 | 11 | Missense    | Between A-domain & TMS5 | Italian, Sardinian                                                             | 18, 62, 19                         |
| 342 | c.2604delC (p.Gly869Glufs*4)            | 11 | Deletion    | Between A-domain & TMS5 | Chinese (Hong Kong), Chinese-Han                                               | 22, 23                             |
| 343 | c.2605G>A (p.Gly869Arg)                 | 11 | Missense    | Between A-domain & TMS5 | Anglo Saxon, Spanish-Grand Canaria, Spanish, Sardinian, Chinese                | 4, 15, 24, 26, 80                  |
| 344 | c.2620 G>C (p.Ala874Pro)                | 11 | Missense    | Between A-domain & TMS5 | Chinese                                                                        | 9, 24, 32, 78                      |
| 345 | c.2621C>T (p.Ala874Val)                 | 11 | Missense    | Between A-domain & TMS5 | Korean, Japanese, Turkish, Taiwanese, Chinese-Han, Bulgarian, Italian, Chinese | 5, 9, 15, 18, 62, 70, 77, 102, 114 |
| 346 | (p.Arg875Gly)                           | 11 | Missense    | Between A-domain & TMS5 | Taiwanese                                                                      | 2                                  |
| 347 | c.2623G>A/A>G (p.Gly875Arg/p.Gly875Arg) | 11 | Missense    | Between A-domain & TMS5 | Indian (South)                                                                 | 115                                |
| 348 | c.2630_2656del (p.Ile877_Ile885del)     | 11 | Deletion    | Between A-domain & TMS5 | Korean                                                                         | 55                                 |
| 349 | c.2627C>T (p.Ser876Phe)                 | 11 | Missense    | Between A-domain & TMS5 | Unknown                                                                        | 116                                |
| 350 | c.2634T>A/G (p.Asn878Lys)               | 11 | Missense    | Between A-domain & TMS5 | Egyptian                                                                       | 25                                 |
| 351 | c.2648_2649del (p.Val883Alafs*3)        | 11 | Deletion    | Between A-domain & TMS5 | Mediterranean, Japanese                                                        | 27, 40                             |
| 352 | c.2650_2652del (p.Ile884del)            | 11 | Deletion    | Between A-domain & TMS5 | Japanese                                                                       | 104                                |
| 353 | c.2604delC (p.Pro868fs)                 | 11 | Deletion    | Between A-domain & TMS5 | Chinese                                                                        | 117                                |
| 354 | c.2659delG (p.Ala887Leufs*14)           | 11 | Deletion    | Between A-domain & TMS5 | Japanese, Chinese                                                              | 24, 114                            |
| 355 | c.2660dupC (p.Thr888Tyrfs*6)            | 11 | Duplication | Between A-domain & TMS5 | Japanese                                                                       | 104                                |
| 356 | c.2662A>C (p.Thr888Pro)                 | 11 | Missense    | Between A-domain & TMS5 | Chinese-Han<br>Chinese                                                         | 9, 23, 24                          |
| 357 | c.2668G>A (p.Val890Met)                 | 11 | Missense    | Between A-domain & TMS5 | Greek, Chinese-Han                                                             | 17, 41                             |
| 358 | c.2672G>A (p.Gly891Asp)                 | 11 | Missense    | Between A-domain & TMS5 | Korean                                                                         | 55                                 |
| 359 | c.2672G>T (p.Gly891Val)                 | 11 | Missense    | Between A-domain & TMS5 | Italian                                                                        | 19                                 |
| 360 | c.2693A>G (p.Gln898Arg)                 | 11 | Missense    | Between A-domain & TMS5 | British                                                                        | 48                                 |
| 361 | c.2695A>T (p.Ile899Phe)                 | 11 | Missense    | Between A-domain & TMS5 | Italian                                                                        | 15                                 |
| 362 | c.2697_2723del27 p.Ile899_Gln907del     | 11 | Deletion    | Between A-domain & TMS5 | Korean, Indian (West)                                                          | 28, 118                            |
| 363 | c.2695_2721del (p.Ile899_Gln907del)     | 11 | Deletion    | Between A-domain & TMS5 | Korean, Chinese                                                                | 82,116                             |
| 364 | c.2728A>T (p.Lys910*)                   | 11 | Nonsense    | Between A-domain & TMS5 | Indian (North)                                                                 | 71                                 |
| 365 | c.2728A>T (p.Lys910ter)                 | 11 | Nonsense    | Between A-domain & TMS5 | Indian                                                                         | 71                                 |
| 366 | c.2730+1G>A                             | 11 | Splice site | Between A-domain & TMS5 | Chinese                                                                        | 17                                 |
| 367 | IVS12+1G>A                              | 12 | Splice site | Between A-domain & TMS5 | American                                                                       | 36                                 |
| 368 | c.2731-2A>G                             | 12 | Splice site | Between A-domain & TMS5 | British, Puerto Rican                                                          | 4                                  |
| 369 | c.2739T>A (p.Ile913Ile)                 | 12 | Silent      | Between A-domain & TMS5 | Taiwanese                                                                      | 119                                |
| 370 | c.2736_2746del111 (p.Ile913fs)          | 12 | Deletion    | between A-domain & TMS5 | Indian (West)                                                                  | 28                                 |
| 371 | c.2743C>T (p.Gln914*)                   | 12 | Nonsense    | Between A-domain & TMS5 | Chinese-Han                                                                    | 5                                  |
| 372 | c.2752G>A (p.Asp918Asn)                 | 12 | Missense    | Between A-domain & TMS5 | Italian                                                                        | 1, 47                              |
| 373 | c.2753A>C (p.Asp918Ala)                 | 12 | Missense    | Between A-domain & TMS5 | French                                                                         | 40                                 |
| 374 | c.2754C>G (p.Asp918Glu)                 | 12 | Missense    | Between A-domain & TMS5 | Japanese, Chinese-Han, Czech/Slovak,                                           | 5, 55, 90, 114                     |



|     |                                     |    |             |                         |                                                                              |                                        |
|-----|-------------------------------------|----|-------------|-------------------------|------------------------------------------------------------------------------|----------------------------------------|
|     |                                     |    |             |                         | Korean                                                                       |                                        |
| 375 | c.2755C>G (p.Arg919Gly)             | 12 | Missense    | Between A-domain & TMS5 | Taiwanese, Chinese                                                           | 2, 9                                   |
| 376 | c.2755C>T (p.Arg919Trp)             | 12 | Missense    | Between A-domain & TMS5 | Italian, Turkish, Japanese, Sardinian                                        | 1, 15, 47, 104                         |
| 377 | c.2761A>C (p.Ser921Arg)             | 12 | Missense    | Between A-domain & TMS5 | Chinese                                                                      | 78                                     |
| 378 | c.2762G>A (p.Ser921Asn)             | 12 | Missense    | Between A-domain & TMS5 | Sardinian, Brazilian                                                         | 1, 8, 47                               |
| 370 | c.2763T>A (p.Ser921Arg)             | 12 | Missense    | Between A-domain & TMS5 | Chinese                                                                      | 10                                     |
| 380 | c.2764_2772del (p.Gly922_Phe924del) | 12 | Deletion    | TMS5                    | Japanese                                                                     | 104                                    |
| 381 | c.2769T>A (p.Tyr923*)               | 12 | Nonsense    | TMS5                    | Chinese                                                                      | 54                                     |
| 382 | c.2785 A>G (p.Ile929Val)            | 12 | Missense    | TMS5                    | Chinese                                                                      | 32                                     |
| 383 | c.2790_2792delCAT                   | 12 | Deletion    | TMS5                    | Chinese                                                                      | 81                                     |
| 384 | c.2794_2795insGT (p.Ser932Cysfs*4)  | 12 | Insertion   | TMS5                    | Chinese                                                                      | 7                                      |
| 385 | c.2795C>A (p.Ser932*)               | 12 | Nonsense    | TMS5                    | Brazilian, Spanish                                                           | 8, 26                                  |
| 386 | c.2797A>C (p.Thr933Pro)             | 12 | Missense    | TMS5                    | Turkish                                                                      | 1, 47                                  |
| 387 | c.2804C>T (p.Thr935Met)             | 12 | Missense    | TMS5                    | Chinese-Han, Italian, Greek, Taiwanese, Chinese, Chinese                     | 2, 5, 9, 15, 24, 66                    |
| 388 | c.2806_2808del (p.Leu936del)        | 12 | Deletion    | TMS5                    | Chinese                                                                      | 63                                     |
| 389 | c.2807T>A (p.Leu936*)               | 12 | Nonsense    | TMS5                    | Greek, Saudi, Greek, Greek, Cypriot, Bulgarian                               | 1, 47, 48, 49, 50, 70                  |
| 390 | c.2810delT (p.Val937Glyfs*5)        | 12 | Deletion    | TMS5                    | Chinese-Han, Chinese                                                         | 5, 38                                  |
| 391 | p.Leu937*                           | 12 | Nonsense    | TMS5                    | Saudi, Greek                                                                 | 49, 50                                 |
| 392 | c.2815_2816insA (p.Trp939*)         | 12 | Nonsense    | TMS5                    | Indian (North), Chinese                                                      | 63, 71                                 |
| 393 | c.2816G>A (p.Trp939*)               | 12 | Nonsense    | TMS5                    | Switzerland                                                                  | 33                                     |
| 394 | c.2817G>T/C (p.Trp939Cys)           | 12 | Missense    | TMS5                    | Hungarian                                                                    | 83                                     |
| 395 | c.2827G>A (p.Gly943Ser)             | 12 | Missense    | TMS5                    | Italian, Bangladeshi, Greek, Cypriot, Spanish, Korean, Sardinian             | 14, 26, 48, 49, 50, 55, 60, 88, 96, 98 |
| 396 | c.2827G>T (p.Gly943Cys)             | 12 | Missense    | TMS5                    | Bangladeshi                                                                  | 38                                     |
| 397 | c.2828G>A (p.Gly943Asp)             | 12 | Missense    | TMS5                    | Italian, Taiwanese, Chinese-Han, Chinese, Chinese (Hong Kong), Thai, Chinese | 5, 9, 14, 34, 35, 59, 103              |
| 398 | p.Gly944Ser                         | 12 | Missense    | TMS5                    | Bangladeshi                                                                  | 49, 50                                 |
| 399 | c.2846T>G (p.Val949Gly)             | 12 | Missense    | Between TMS5 & TMS6     | Brazilian                                                                    | 8                                      |
| 400 | c.2847_2849del (p.Val950del)        | 12 | Deletion    | Between TMS5 & TMS6     | Saudi Arabian                                                                | 54                                     |
| 401 | c.2853_2856del (p.Gln951Hisfs*15)   | 12 | Deletion    | Between TMS5 & TMS6     | Chinese                                                                      | 7                                      |
| 402 | p.Arg952Lys                         | 12 | Missense    | Between TMS5 & TMS6     | Chinese                                                                      | 120                                    |
| 403 | c.2862_2865del (p.Phe954Leufs*12)   | 12 | Deletion    | Between TMS5 & TMS6     | Spanish                                                                      | 26                                     |
| 404 | c.2865+1G>A                         | 12 | Splice site | Between TMS5 & TMS6     | Czech/Slovak, Indian (West)                                                  | 28, 90                                 |
| 405 | c.2866-2A>G                         | 13 | Splice site | Between TMS5 & TMS6     | Omani, Indian (West)                                                         | 28, 121                                |
| 406 | c.2866-7T>C                         | 13 | Splice site | Between TMS5 & TMS6     | Chinese-Han                                                                  | 17                                     |
| 407 | c.2866-6T>G                         | 13 | Splice site | Between TMS5 & TMS6     | Italian                                                                      | 69                                     |
| 408 | c.2871delC (p.Asn958Thrfs*9)        | 13 | Deletion    | Between TMS5 & TMS6     | Japanese                                                                     | 3                                      |
| 409 | c.2887delC (p.Gln963Argfs*4)        | 13 | Deletion    | Between TMS5 &          | Chinese-Han                                                                  | 17                                     |

|     |                                             |    |                    |                                   |                                                                                                                                                                  |                                                                    |
|-----|---------------------------------------------|----|--------------------|-----------------------------------|------------------------------------------------------------------------------------------------------------------------------------------------------------------|--------------------------------------------------------------------|
|     |                                             |    |                    | TMS6                              |                                                                                                                                                                  |                                                                    |
| 410 | c.2887C>T (p.Gln963*)                       | 13 | Nonsense           | Between TMS5 & TMS6               | Chinese-Han                                                                                                                                                      | 17                                                                 |
| 411 | c.2899A>T (p.Ile967Phe)                     | 13 | Missense           | Between TMS5 & TMS6               | N European, Middle Eastern                                                                                                                                       | 51                                                                 |
| 412 | c.2905C>T (p.Arg969Trp)                     | 13 | Missense           | TMS6                              | Italian                                                                                                                                                          | 15                                                                 |
| 413 | c.2906G>A (p.Arg969Gln)                     | 13 | Missense           | TMS6                              | Italian,Turkish, Libyan-Jewish, Tunisian-Jewish, Greek, German, Italian, Mediterranean, European, Bulgarian, Indian (South), Hungarian, Indian, Greek (Kalymnos) | 1, 14, 18, 42, 44, 46, 47, 57, 60, 62, 70, 83, 88, 89, 122         |
| 414 | c.2921C>T (p.Ala971Val)                     | 13 | Missense           | TMS6                              | British                                                                                                                                                          | 39                                                                 |
| 415 | c.2921C>T (p.Thr974Met)                     | 13 | Missense           | TMS6                              | Macedonian                                                                                                                                                       | 39                                                                 |
| 416 | c.2924C>A (p.Ser975Tyr)                     | 13 | Missense           | TMS6                              | Chinese-Han, Chinese                                                                                                                                             | 9, 17                                                              |
| 417 | c.2930C>T (p.Thr977Met)                     | 13 | Missense           | TMS6                              | N.European, Middle Eastern, Mediterranean, British, Swedish, Hungarian, Polish, Spanish, Indian (East), Italian, Egyptian, Czech, Indian (West)                  | 1, 15, 16, 25, 26, 28, 47, 49, 53, 60, 75, 76, 89, 90, 96, 123     |
| 418 | c.2930C > G                                 | 13 | Missense           | TMS6                              | Thai                                                                                                                                                             | 34                                                                 |
| 419 | c.2932G>A (p.Val978Met)                     | 13 | Missense           | TMS6                              | Indian (East and West)                                                                                                                                           | 13                                                                 |
| 420 | c.2936T>A (p.Leu979Gln)                     | 13 | Missense           | TMS6                              | French                                                                                                                                                           | 40                                                                 |
| 421 | c.2938T>C (p.Cys980Leu)                     | 13 | Missense           | TMS6                              | Chinese                                                                                                                                                          | 10                                                                 |
| 422 | c.2939G>A (p.Cys980Tyr)                     | 13 | Missense           | TMS6                              | Chinese, Chinese-Han                                                                                                                                             | 23, 63                                                             |
| 423 | c.2945C>T (p.Ala982Val)                     | 13 | Missense           | TMS6                              | Italian                                                                                                                                                          | 15                                                                 |
| 424 | p.Ala982Thr                                 | 13 | Missense           | TMS6                              | Chinese                                                                                                                                                          | 124                                                                |
| 425 | c.2954G>A (p.Cys985Tyr)                     | 13 | Missense           | TMS6                              | German                                                                                                                                                           | 42                                                                 |
| 426 | p.Ser986Phe                                 | 13 | Missense           | TMS6                              | Taiwanese                                                                                                                                                        | 2                                                                  |
| 427 | c.2960T>C (p.Leu987Pro)                     | 13 | Missense           | TMS6                              | Chinese                                                                                                                                                          | 10                                                                 |
| 428 | c.2962G>C (p.Gly988Arg)                     | 13 | Missense           | TMS6                              | Polish                                                                                                                                                           | 53                                                                 |
| 429 | c.2968G > C (p.Ala990Pro)                   | 13 | Missense           | TMS6                              | Indian (West)                                                                                                                                                    | 28                                                                 |
| 430 | c.2970G>C (p.Ala990Ala)                     | 13 | Silent             | Between TMS6 & ATP Binding Domain | Spanish                                                                                                                                                          | 100                                                                |
| 431 | c.2972C>T (p.Thr991Met)                     | 13 | Missense           | Between TMS6 & ATP Binding Domain | German, British, Sardinian                                                                                                                                       | 15, 38                                                             |
| 432 | c.2975C>T (p.Pro992Leu)                     | 13 | Missense           | Between TMS6 & ATP Binding Domain | Japanese, Turkish, Taiwanese, German, Chinese-Han, Polish, Chinese (Hong Kong), Taiwanese, Korean, Thai, Chinese                                                 | 1, 3, 17, 22, 24, 34, 35, 47, 53, 55, 56, 57, 60, 79, 96, 107, 119 |
| 433 | c.2975C>A (p.Pro992His)                     | 13 | Missense           | Between TMS6 & ATP Binding Domain | Indian (North)                                                                                                                                                   | 71                                                                 |
| 434 | c.2977dupA (p.Thr993Asnfs*35)               | 13 | Duplication        | Between TMS6 & ATP Binding Domain | Indian (North), Indian                                                                                                                                           | 71, 125                                                            |
| 435 | c.2978C>T (p.Thr993Met)                     | 13 | Missense           | Between TMS6 & ATP Binding Domain | Sardinian                                                                                                                                                        | 88                                                                 |
| 436 | c.2984T>C (p.Val995Ala)                     | 13 | Missense           | Between TMS6 & ATP Binding Domain | Unknown                                                                                                                                                          | 60                                                                 |
| 437 | c.2986_3008delinsTATGTGG (p.Met996Tyrfs*21) | 13 | Deletion/Insertion | Between TMS6 & ATP Binding        | Polish                                                                                                                                                           | 53                                                                 |

|     |                                     |    |             |                                   |                                                                                                    |                                     |
|-----|-------------------------------------|----|-------------|-----------------------------------|----------------------------------------------------------------------------------------------------|-------------------------------------|
|     |                                     |    |             | Domain                            |                                                                                                    |                                     |
| 438 | c.2987T>C (p.Met996Thr)             | 13 | Missense    | Between TMS6 & ATP Binding Domain | Scottish                                                                                           | 38                                  |
| 439 | c.2993G>A (p.Gly998Asp)             | 13 | Missense    | Between TMS6 & ATP Binding Domain | Egyptian                                                                                           | 25                                  |
| 440 | c.2997dupC (p.Gly1000Argfs*28)      | 13 | Duplication | Between TMS6 & ATP Binding Domain | Yemeni, Egyptian                                                                                   | 16, 25                              |
| 441 | c.2998G>A (p.Gly1000Arg)            | 13 | Missense    | Between TMS6 & ATP Binding Domain | British, Sardinian                                                                                 | 38, 88                              |
| 442 | c.3007G>A (p.Ala1003Thr)            | 13 | Missense    | Between TMS6 & ATP Binding Domain | Italian, Japanese, Greek, Cypriot, Mediterranean, Indian (North), Bulgarian, Indian, Indian (West) | 1, 27, 28, 47, 48, 70, 71, 104, 126 |
| 443 | c.3008C>T (p.Ala1003Val)            | 13 | Missense    | Between TMS6 & ATP Binding Domain | Turkish, Indian (South)                                                                            | 18, 44, 62                          |
| 444 | c.3010C>T (p.Gln1004*)              | 13 | Nonsense    | Between TMS6 & ATP Binding Domain | Chinese                                                                                            | 7                                   |
| 445 | c.3011A>C (p.Gln1004Pro)            | 13 | Missense    | Between TMS6 & ATP Binding Domain | European                                                                                           | 39                                  |
| 446 | c.3026_3028del (p.Ile1009del)       | 13 | Deletion    | Between TMS6 & ATP Binding Domain | Indian                                                                                             | 116                                 |
| 447 | c.3028A>G (p.Lys1010Glu)            | 13 | Missense    | Between TMS6 & ATP Binding Domain | Chinese                                                                                            | 127                                 |
| 448 | c.3029A>G (p.Lys1010Arg)            | 13 | Missense    | Between TMS6 & ATP Binding Domain | Indian (South)                                                                                     | 44                                  |
| 449 | c.3029A>C (p.Lys1010Thr)            | 13 | Missense    | Between TMS6 & ATP Binding Domain | Japanese                                                                                           | 104                                 |
| 450 | c.3029_3030insT (p.Lys1010Nfs*18)   | 13 | Insertion   | Between TMS6 & ATP Binding Domain | Chinese-Han                                                                                        | 17                                  |
| 451 | c.3031_3032insC (p.Gly1011Alafs*17) | 13 | Insertion   | Between TMS6 & ATP Binding Domain | Indian (North)                                                                                     | 71                                  |
| 452 | c.3034G>C (p.Gly1012Arg)            | 13 | Missense    | Between TMS6 & ATP Binding Domain | Greek                                                                                              | 15                                  |
| 453 | c.3035G>T (p.Gly1012Val)            | 13 | Missense    | Between TMS6 & ATP Binding Domain | Italian                                                                                            | 15                                  |
| 454 | c.3053C>T (p.Ala1018Val)            | 13 | Missense    | Between TMS6 & ATP Binding Domain | Sardinian, Czech, Italian, Chinese-Han Sardinian                                                   | 1, 15, 23, 47, 88, 90               |
| 455 | c.3056A>C (p.His1019Pro)            | 13 | Missense    | Between TMS6 & ATP Binding Domain | Chinese                                                                                            | 9                                   |
| 456 | c.3060+5G>T                         | 13 | Splice site | Between TMS6 & ATP Binding Domain | Spanish                                                                                            | 26                                  |
| 457 | c.3061-3C>A                         | 13 | Splice site | Between TMS6 & ATP Binding Domain | Chinese                                                                                            | 9                                   |
| 458 | c.2963G>T (p.Gly988Val)             | 13 | Missense    | ATP Binding Domain                | Chinese (Han)                                                                                      | 30                                  |
| 459 | c.3041 C>T (p.Pro1014Leu)           | 13 | Missense    | ATP Binding Domain                | Chinese                                                                                            | 32                                  |
| 460 | c.3061G>A (p.Lys1020Lys)            | 13 | Missense    | ATP Binding Domain                | Iranian                                                                                            | 105                                 |
| 461 | c.3061-12T>A                        | 14 | Splice site | ATP Binding Domain                | Spanish-Grand Canaria, Spanish                                                                     | 69, 80                              |
| 462 | c.3061-3C>A                         | 14 | Splice site | ATP Binding Domain                | Chinese-Han                                                                                        | 23                                  |
| 463 | c.3061-1G>A                         | 14 | Splice site | ATP Binding Domain                | Mediterranean                                                                                      | 19                                  |
| 464 | c.3062T>A (p.Ile1021Lys)            | 14 | Missense    | ATP Binding                       | Danish                                                                                             | 72                                  |

|     |                                         |    |          |                    |                                                                                                        |                                                  |
|-----|-----------------------------------------|----|----------|--------------------|--------------------------------------------------------------------------------------------------------|--------------------------------------------------|
|     |                                         |    |          | Domain             |                                                                                                        |                                                  |
| 465 | c.3071T>C (p.Val1024Ala)                | 14 | Missense | ATP Binding Domain | Korean                                                                                                 | 55                                               |
| 466 | c.3074T>G (p.Met1025Arg)                | 14 | Missense | ATP Binding Domain | Chinese-Han                                                                                            | 23                                               |
| 467 | c.3080A>C (p.Asp1027Ala)                | 14 | Missense | ATP Binding Domain | Unknown                                                                                                | 128                                              |
| 468 | c.3082_3085delinsCG (p.Lys1028Argfs*40) | 14 | Deletion | ATP Binding Domain | North European (French Canadian)                                                                       | 39                                               |
| 469 | c.3083_3084del (p.Lys1028Asnfs*40)      | 14 | Deletion | ATP Binding Domain | British, French                                                                                        | 16, 40                                           |
| 470 | c.3083_3085delinsG (p.Lys1028Serfs*40)  | 14 | Deletion | ATP Binding Domain | Italian, N. European, Middle Eastern                                                                   | 14, 51                                           |
| 471 | c.3085A>G (p.Thr1029Ala)                | 14 | Missense | ATP Binding Domain | Unknown                                                                                                | 128                                              |
| 472 | c.3085_3086del (p.Thr1029Trpfs*39)      | 14 | Deletion | ATP Binding Domain | British, N. European                                                                                   | 49, 50                                           |
| 473 | c.3086C>T (p.Thr1029Ile)                | 14 | Missense | ATP Binding Domain | Korean, Japanese                                                                                       | 55, 101                                          |
| 474 | c.3087delT (p.Gly1030Alafs*91)          | 14 | Deletion | ATP Binding Domain | Chinese                                                                                                | 68                                               |
| 475 | c.3088delAC                             | 14 | Deletion | ATP Binding Domain | British                                                                                                | 49, 50                                           |
| 476 | c.3089G>A (p.Gly1030Asp)                | 14 | Missense | ATP Binding Domain | Indian (West), Chinese                                                                                 | 28, 30                                           |
| 477 | c.3091A>T (p.Thr1031Ser)                | 14 | Missense | ATP Binding Domain | German                                                                                                 | 43                                               |
| 478 | c.3091A>G (p.Thr1031Ala)                | 14 | Missense | ATP Binding Domain | Korean, Indian (East)                                                                                  | 55, 75, 76                                       |
| 479 | c.3097A>G (p.Thr1033Ala)                | 14 | Missense | ATP Binding Domain | Pakistani                                                                                              | 16                                               |
| 480 | c.3098C>G (p.Thr1033Ser)                | 14 | Missense | ATP Binding Domain | Czech/Slovak                                                                                           | 6                                                |
| 481 | c.3098C>T (p.Thr1033Ile)                | 14 | Missense | ATP Binding Domain | Chinese                                                                                                | 7                                                |
| 482 | c.3104G>T (p.Gly1035Val)                | 14 | Missense | ATP Binding Domain | Japanese, Korean                                                                                       | 3, 55                                            |
| 483 | c.3106G>A (p.Val1036Ile)                | 14 | Missense | ATP Binding Domain | Turkish                                                                                                | 110                                              |
| 484 | c.3111delC (p.Arg1038Gly-fs*83)         | 14 | Missense | ATP Binding Domain | Turkish                                                                                                | 110                                              |
| 485 | c.3113G>A (p.Arg1038Lys)                | 14 | Missense | ATP Binding Domain | Finnish                                                                                                | 67                                               |
| 486 | c.3121C>T (p.Arg1041Trp)                | 14 | Missense | ATP Binding Domain | Italian, American, Taiwanese                                                                           | 1, 2, 8, 36, 47                                  |
| 487 | c.3122G>C (p.Arg1041Pro)                | 14 | Missense | ATP Binding Domain | Italian, Chinese-Han                                                                                   | 5, 18, 62                                        |
| 488 | c.3128T>C (p.Leu1043Pro)                | 14 | Missense | ATP Binding Domain | Sardinian, British, American                                                                           | 16, 19, 36                                       |
| 489 | c.3140delA (p.Asp1047Valfs*75)          | 14 | Deletion | ATP Binding Domain | Czech/Slovak, Polish, Chinese-Han Chinese                                                              | 6, 23, 24, 53                                    |
| 490 | c.3140A>T (p.Asp1047Val)                | 14 | Missense | ATP Binding Domain | Chinese-Han Chinese                                                                                    | 23, 117                                          |
| 491 | c.3147delC (p.Thr1050Hisfs*71)          | 14 | Deletion | ATP Binding Domain | Indian, Indian (East), Indian (West)                                                                   | 28, 49, 50                                       |
| 492 | c.3155C>T (p.Pro1052Leu)                | 14 | Missense | ATP Binding Domain | British                                                                                                | 16                                               |
| 493 | c.3182G>A (p.Gly1061Glu)                | 14 | Missense | ATP Binding Domain | Pakistani, Turkish, Greek, Russian, Indian (South), Spanish, Indian, Hungarian, Italian, Indian (West) | 11, 15, 16, 18, 26, 28, 41, 44, 62, 83, 129, 130 |
| 494 | c.3191A>C (p.Glu1064Ala)                | 14 | Missense | ATP Binding Domain | Jewish, Ashkenazi Jewish, American                                                                     | 4, 36, 46, 60, 131                               |
| 495 | p.Glu1064Lys                            | 14 | Missense | ATP Binding Domain | American                                                                                               | 36                                               |
| 496 | c.3193G>C (p.Ala1065Pro)                | 14 | Missense | ATP Binding Domain | Spanish, European                                                                                      | 100, 132                                         |
| 497 | c.3203A>G (p.Glu1068Gly)                | 14 | Missense | ATP Binding Domain | Italian                                                                                                | 18, 62                                           |
| 498 | c.3206C>A (p.His1069Asn)                | 14 | Missense | ATP Binding Domain | Iranian                                                                                                | 105                                              |
| 499 | c.3207C>A (p.His1069Gln)                | 14 | Missense | ATP Binding        | Russian, N. American,                                                                                  | 1, 4, 14, 16,                                    |

|     |                                |    |             | Domain             | Italian, Turkish, Albanian, Dutch, Polish, Swedish, Ukrainian, Greek, German, French, British, N. European, N. European, Middle Eastern, Polish, Austrian, Polish, Swedish, German, Cuban, Ashkenazi Jewish, Moroccan-Jewish, Greek, French, Italian, British, Hungarian, German, Russian, Italian, Mediterranean, Sardinian, Swedish, British, Hungarian, Czech, Spanish, Bulgarian, French, Egyptian, Brazilian, Greek (Kalymnos), Dutch/German | 18, 25, 26, 40, 42, 43, 46, 47, 48, 49, 50, 51, 57, 60, 62, 70, 88, 89, 90, 97, 113, 123, 128, 129, 131, 133, 134, 135, 136, 137, 138, 139 |
|-----|--------------------------------|----|-------------|--------------------|---------------------------------------------------------------------------------------------------------------------------------------------------------------------------------------------------------------------------------------------------------------------------------------------------------------------------------------------------------------------------------------------------------------------------------------------------|--------------------------------------------------------------------------------------------------------------------------------------------|
| 500 | c.3106G>A (p.Val1036Ile)       | 14 | Missense    | ATP Binding Domain | Turkish                                                                                                                                                                                                                                                                                                                                                                                                                                           | 111                                                                                                                                        |
| 501 | c.3111delC (p.Arg1038Glyfs*83) | 14 | Deletion    | ATP Binding Domain | Turkish                                                                                                                                                                                                                                                                                                                                                                                                                                           | 111                                                                                                                                        |
| 502 | c.3149delC                     | 14 | Deletion    | ATP Binding Domain | Indian                                                                                                                                                                                                                                                                                                                                                                                                                                            | 49, 50                                                                                                                                     |
| 503 | c.3157dupC (p.Leu1053Profs*16) | 14 | Duplication | ATP Binding Domain | Chinese, Indian (West)                                                                                                                                                                                                                                                                                                                                                                                                                            | 28, 32                                                                                                                                     |
| 504 | c.3188C>T (p.Ala1063Val)       | 14 | Missense    | ATP Binding Domain | Egyptian                                                                                                                                                                                                                                                                                                                                                                                                                                          | 84                                                                                                                                         |
| 505 | p.His1070Gln                   | 14 | Missense    | ATP Binding Domain | Eastern European, German, French, British                                                                                                                                                                                                                                                                                                                                                                                                         | 133                                                                                                                                        |
| 506 | p.Thr1076Ile                   | 14 | Missense    | ATP Binding Domain | Egyptian                                                                                                                                                                                                                                                                                                                                                                                                                                          | 140                                                                                                                                        |
| 507 | c.3236G>T (p.Cys1079Phe)       | 14 | Missense    | ATP Binding Domain | Chinese                                                                                                                                                                                                                                                                                                                                                                                                                                           | 78                                                                                                                                         |
| 508 | c.3243+5G>A                    | 15 | Splice site | ATP Binding Domain | Indian (West)                                                                                                                                                                                                                                                                                                                                                                                                                                     | 28                                                                                                                                         |
| 509 | c.3247C>T (p.Leu1083Phe)       | 15 | Missense    | ATP Binding Domain | Korean, Japanese, Unknown                                                                                                                                                                                                                                                                                                                                                                                                                         | 77, 97, 130                                                                                                                                |
| 510 | c.3244G>T (p.Glu1082*)         | 15 | Nonsense    | ATP Binding Domain | Italy                                                                                                                                                                                                                                                                                                                                                                                                                                             | 33                                                                                                                                         |
| 511 | c.3244-2A>G                    | 15 | Splice-site | ATP Binding Domain | Italy, Chinese                                                                                                                                                                                                                                                                                                                                                                                                                                    | 33, 78                                                                                                                                     |
| 512 | c.3263T>A (p.Leu1088*)         | 15 | Nonsense    | ATP Binding Domain | Czech/Slovak , Brazilian                                                                                                                                                                                                                                                                                                                                                                                                                          | 6, 8                                                                                                                                       |
| 513 | c.3266G>A (p.Gly1089Glu)       | 15 | Missense    | ATP Binding Domain | Turkish                                                                                                                                                                                                                                                                                                                                                                                                                                           | 19                                                                                                                                         |
| 514 | c.3266G>T (p.Gly1089Val)       | 15 | Missense    | ATP Binding Domain | Sardinian                                                                                                                                                                                                                                                                                                                                                                                                                                         | 1, 47                                                                                                                                      |
| 515 | c.3272G>A (p.Cys1091Tyr)       | 15 | Missense    | ATP Binding Domain | Korean                                                                                                                                                                                                                                                                                                                                                                                                                                            | 55                                                                                                                                         |
| 516 | c.3282C>G (p.Phe1094Leu)       | 15 | Missense    | ATP Binding Domain | Brazilian, Indian (South)                                                                                                                                                                                                                                                                                                                                                                                                                         | 8                                                                                                                                          |
| 517 | c.3284A>C (p.Gln1095Pro)       | 15 | Missense    | ATP Binding Domain | British, Polish                                                                                                                                                                                                                                                                                                                                                                                                                                   | 16, 53                                                                                                                                     |
| 518 | c.3293C>G (p.Pro1098Arg)       | 15 | Missense    | ATP Binding Domain | Chinese-Han                                                                                                                                                                                                                                                                                                                                                                                                                                       | 17                                                                                                                                         |
| 519 | c.3295G>A (p.Gly1099Ser)       | 15 | Missense    | ATP Binding Domain | Greek, Spanish, Italian                                                                                                                                                                                                                                                                                                                                                                                                                           | 15, 26, 41                                                                                                                                 |
| 520 | c.3301G>A (p.Gly1101Arg)       | 15 | Missense    | ATP Binding Domain | Indian, Indian (west)                                                                                                                                                                                                                                                                                                                                                                                                                             | 28, 49, 50                                                                                                                                 |
| 521 | c.3044T>C (p.Leu1015Pro)       | 15 | Missense    | ATP Binding Domain | Chinese                                                                                                                                                                                                                                                                                                                                                                                                                                           | 86                                                                                                                                         |
| 522 | c.3305T>C (p.Ile1102Thr)       | 15 | Missense    | ATP Binding Domain | Indian, Greek, Cypriot, Arabic, Mediterranean, Czech, Indian (East), Indian (west)                                                                                                                                                                                                                                                                                                                                                                | 27, 28, 48, 49, 50, 75, 76                                                                                                                 |

|     |                                           |    |                    |                    |                                                                                                                                                                                                                                          |                                                                             |
|-----|-------------------------------------------|----|--------------------|--------------------|------------------------------------------------------------------------------------------------------------------------------------------------------------------------------------------------------------------------------------------|-----------------------------------------------------------------------------|
| 523 | c.3309delG (p.Cys1104Alafs*17)            | 15 | Deletion           | ATP Binding Domain | Chinese-Han                                                                                                                                                                                                                              | 17                                                                          |
| 524 | c.3310T>A (p.Cys1104Ser)                  | 15 | Deletion           | ATP Binding Domain | Indian                                                                                                                                                                                                                                   | 141                                                                         |
| 525 | c.3311G>T (p.Cys1104Phe)                  | 15 | Missense           | ATP Binding Domain | Turkish                                                                                                                                                                                                                                  | 18, 62                                                                      |
| 526 | c.3311G>A (p.Cys1104Tyr)                  | 15 | Missense           | ATP Binding Domain | Indian (North)                                                                                                                                                                                                                           | 71                                                                          |
| 527 | c.3316G>A (p.Val1106Ile)                  | 15 | Missense           | ATP Binding Domain | Chinese                                                                                                                                                                                                                                  | 59                                                                          |
| 528 | c.3317T>A (p.Val1106Asp)                  | 15 | Missense           | ATP Binding Domain | North European, Middle Eastern                                                                                                                                                                                                           | 51, 130                                                                     |
| 529 | c.3332G>A (p.Gly1111Asp)                  | 15 | Missense           | ATP Binding Domain | Czech/Slovak                                                                                                                                                                                                                             | 6, 90                                                                       |
| 530 | c.3337C>A (p.Leu1113Met)                  | 15 | Missense           | ATP Binding Domain | Indian                                                                                                                                                                                                                                   | 141                                                                         |
| 531 | c.3344A>G/G>A (p.Arg1115His/p.His1115Arg) | 15 | Missense           | ATP Binding Domain | Unknown                                                                                                                                                                                                                                  | 60                                                                          |
| 532 | c.3350_3353del (p.Glu1117Alafs*3)         | 15 | Deletion           | ATP Binding Domain | Polish                                                                                                                                                                                                                                   | 53                                                                          |
| 533 | c.3359T>A (p.Leu1120*)                    | 15 | Nonsense           | ATP Binding Domain | Spanish                                                                                                                                                                                                                                  | 26                                                                          |
| 534 | c.3365_3366ins11                          | 15 | Insertion          | ATP Binding Domain | Italian                                                                                                                                                                                                                                  | 15                                                                          |
| 535 | c.3373_3377delinsTCT (p.His1126Profs*3)   | 15 | Deletion/Insertion | ATP Binding Domain | Egyptian                                                                                                                                                                                                                                 | 25                                                                          |
| 536 | c.3376delC (p.His1126Thrfs*2)             | 15 | Deletion           | ATP Binding Domain | Italian, Russian, N. American, Ukrainian, N. European, Middle Eastern, German, Cuban, French, Portugese, British, German, Spanish-Grand Canaria, Hungarian, Mediterranean, Chinese-Han, Brazilian, Polish, Spanish, Bulgarian, Brazilian | 8, 14, 16, 17, 26, 27, 42, 43, 49, 50, 51, 53, 57, 70, 80, 89, 97, 129, 139 |
| 537 | c.3373_3377delAGTCAinsTC (p.His1126fs)    | 15 | Deletion-Insertion | ATP Binding Domain | Egyptian                                                                                                                                                                                                                                 | 84                                                                          |
| 538 | c.3310 T>C ( p.Cys1104Arg)                | 15 | Missense           | ATP Binding Domain | Chinese                                                                                                                                                                                                                                  | 32                                                                          |
| 539 | c.G>A3311 (p.Cys1104Thr)                  | 15 | Missense           | ATP Binding Domain | Mediterranean                                                                                                                                                                                                                            | 142                                                                         |
| 540 | c.3377_3378 delAC (p.His1126Profs*3)      | 15 | Deletion           | ATP Binding Domain | Chinese                                                                                                                                                                                                                                  | 9                                                                           |
| 541 | c.3402delC (p.Ala1135Glnfs*13)            | 15 | Deletion           | ATP Binding Domain | Venezuelan                                                                                                                                                                                                                               | 143                                                                         |
| 542 | c.3403delC                                | 15 | Deletion           | ATP Binding Domain | Ukrainian                                                                                                                                                                                                                                | 133                                                                         |
| 543 | c.3406 G>A                                | 15 | Unknown            | ATP Binding Domain | Chinese                                                                                                                                                                                                                                  | 58                                                                          |
| 544 | c.3412+1G>A                               | 15 | Splice site        | ATP Binding Domain | Indian (East)                                                                                                                                                                                                                            | 75, 76                                                                      |
| 545 | c.3418delT (p.Val1140Ala-fs)              | 16 | Deletion           | ATP Binding Domain | Indian                                                                                                                                                                                                                                   | 71                                                                          |
| 546 | c.3419C>T (p.Ala1140Val)                  | 16 | Missense           | ATP Binding Domain | Chinese                                                                                                                                                                                                                                  | 59                                                                          |
| 547 | c.3419delT (p.Gln1142Argfs*6)             | 16 | Deletion           | ATP Binding Domain | Indian (North)                                                                                                                                                                                                                           | 71                                                                          |
| 548 | c.3424C>T(p.Gln1142*)                     | 16 | Nonsense           | ATP Binding Domain | Italian, American                                                                                                                                                                                                                        | 18, 36, 62                                                                  |
| 549 | c.3424dupC (p.Gln1142Profs*11)            | 16 | Duplication        | ATP Binding Domain | Indian (North)                                                                                                                                                                                                                           | 71                                                                          |
| 550 | c.3426G>C (p.Gln1142His)                  | 16 | Missense           | ATP Binding Domain | Taiwanese, Chinese-Han                                                                                                                                                                                                                   | 5, 23, 35                                                                   |
| 551 | c.3436G>A (p.Val1146Met)                  | 16 | Missense           | ATP Binding Domain | Sardinian, Mediterranean                                                                                                                                                                                                                 | 1, 18, 47, 62                                                               |

|     |                                 |    |          |                    |                                                                            |                                       |
|-----|---------------------------------|----|----------|--------------------|----------------------------------------------------------------------------|---------------------------------------|
| 552 | c.3443T>C (p.Ile1148Thr)        | 16 | Missense | ATP Binding Domain | Greek, German, Chinese-Han, Greek (Crete), Korean, Egyptian, Thai, Chinese | 1, 17, 24, 25, 29, 34, 42, 47, 55, 90 |
| 553 | c.3446G>C (p.Gly1149Ala)        | 16 | Missense | ATP Binding Domain | Filipino                                                                   | 39                                    |
| 554 | c.3446G>A (p.Gly1149Glu)        | 16 | Missense | ATP Binding Domain | Chinese                                                                    | 32, 58, 78                            |
| 555 | c.3449delA (p.Asn1150Thrfs*5)   | 16 | Deletion | ATP Binding Domain | British, Brazilian                                                         | 8, 16                                 |
| 556 | c.3451C>T (p.Arg1151Cys)        | 16 | Missense | ATP Binding Domain | Sardinian, Turkish, Chinese                                                | 7, 15, 110, 111                       |
| 557 | c.3452G>A (p.Arg1151His)        | 16 | Missense | ATP Binding Domain | Turkish                                                                    | 18, 62                                |
| 558 | c.3457T>C (p.Trp1153Arg)        | 16 | Missense | ATP Binding Domain | N. European, Middle Eastern                                                | 51                                    |
| 559 | c.3458G>A (p.Trp1153*)          | 16 | Missense | ATP Binding Domain | Indian (West)                                                              | 28                                    |
| 560 | c.3459G>T (p.Trp1153Cys)        | 16 | Missense | ATP Binding Domain | Taiwanese                                                                  | 35                                    |
| 561 | c.3467G>A (p.Arg1156His)        | 16 | Missense | ATP Binding Domain | Chinese-Han                                                                | 23                                    |
| 562 | c.3472_3482del (p.Gly1158Phe*2) | 16 | Deletion | ATP Binding Domain | Polish                                                                     | 4                                     |
| 563 | c.3473G>T (p.Gly1158Val)        | 16 | Missense | ATP Binding Domain | Danish                                                                     | 72                                    |
| 564 | c.3490G>A (p.Asp1164Asn)        | 16 | Missense | ATP Binding Domain | Italian                                                                    | 39                                    |
| 565 | c.3502G>T (p.Ala1168Ser)        | 16 | Missense | ATP Binding Domain | Korean                                                                     | 82                                    |
| 566 | c.3502G>C (p.Ala1168Pro)        | 16 | Missense | ATP Binding Domain | Taiwanese                                                                  | 119                                   |
| 567 | c.3505A>G (p.Met1169Val)        | 16 | Missense | ATP Binding Domain | Unknown                                                                    | 130                                   |
| 568 | c.3506T>C (p.Met1169Thr)        | 16 | Missense | ATP Binding Domain | Turkish                                                                    | 18, 62                                |
| 569 | c.3517G>A (p.Glu1173Lys)        | 16 | Missense | ATP Binding Domain | Italian, Taiwanese, Chinese-Han, French, Chinese                           | 5, 18, 24, 40, 62, 102                |
| 570 | c.3518A>G (p.Glu1173Gly)        | 16 | Missense | ATP Binding Domain | Irish                                                                      | 39                                    |
| 571 | c.3526G>A (p.Gly1176Arg)        | 16 | Missense | ATP Binding Domain | German, Greek, Cypriot, Czech, Greek (Crete)                               | 29, 43, 48, 90                        |
| 572 | c.3527G>A (p.Gly1176Glu)        | 16 | Missense | ATP Binding Domain | Scottish                                                                   | 38                                    |
| 573 | c.3532A>G (p.Thr1178Ala )       | 16 | Missense | ATP Binding Domain | Taiwanese, Indian (East), Chinese-Han Thai                                 | 23, 34, 75, 76, 119                   |
| 574 | c.3538delA (p.Ile1180Serfs*12)  | 16 | Deletion | ATP Binding Domain | Japanese                                                                   | 101                                   |
| 575 | c.3547G>A (p.Ala1183Thr)        | 16 | Missense | ATP Binding Domain | Italian                                                                    | 1, 47                                 |
| 576 | c.3548C>G (p.Ala1183Gly)        | 16 | Missense | ATP Binding        | Italian                                                                    | 69                                    |

|     |                                       |    |             | Domain             |                                                                                 |                                    |
|-----|---------------------------------------|----|-------------|--------------------|---------------------------------------------------------------------------------|------------------------------------|
| 577 | c.3551T>C (p.Ile1184Thr)              | 16 | Missense    | ATP Binding Domain | Polish                                                                          | 54                                 |
| 578 | c.3552dupT (p.Asp1185*)               | 16 | Nonsense    | ATP Binding Domain | N. American                                                                     | 133                                |
| 579 | c.3556G>A (p.Gly1186Ser)              | 16 | Missense    | ATP Binding Domain | Japanese, Korean, Indian (Western and eastern)                                  | 13, 55, 114                        |
| 580 | c.3556G>T (p.Gly1186Cys)              | 16 | Missense    | ATP Binding Domain | Jewish                                                                          | 4                                  |
| 581 | c.3556+1G>A                           | 16 | Splice site | ATP Binding Domain | British, North European                                                         | 49, 50                             |
| 582 | c.3556+1G>T                           | 16 | Splice site | ATP Binding Domain | Bashkortostan                                                                   | 129                                |
| 583 | c.3557-2A>G                           | 16 | Splice site | ATP Binding Domain | Chinese                                                                         | 7                                  |
| 584 | c.3559+1G>A                           | 17 | Splice site | ATP Binding Domain | British                                                                         | 49, 50                             |
| 585 | c.3565_3566delTG                      | 17 | Deletion    | ATP Binding Domain | Thai                                                                            | 34                                 |
| 586 | c.3577G>C (p.Ala1193Pro)              | 17 | Missense    | ATP Binding Domain | Taiwanese                                                                       | 119                                |
| 587 | c.3584C>T (p.Ala1195Val)              | 17 | Missense    | ATP Binding Domain | Chinese                                                                         | 9                                  |
| 588 | c.3588dupC (p.Ala1197Argfs*62)        | 17 | Duplication | ATP Binding Domain | N. European, Middle Eastern                                                     | 51                                 |
| 589 | c.3598C>T (p.Gln1200*)                | 17 | Nonsense    | ATP Binding Domain | French                                                                          | 40                                 |
| 590 | c.3599A>C (p.Gln1200Pro)              | 17 | Missense    | ATP Binding Domain | French                                                                          | 97                                 |
| 591 | c.3620A>G (p.His1207Arg)              | 17 | Missense    | ATP Binding Domain | Egyptian                                                                        | 25                                 |
| 592 | c.3627_3630del (p.Gln1210Alafs*8)     | 17 | Deletion    | ATP Binding Domain | Swedish, North European, Middle Eastern                                         | 49, 50, 51                         |
| 593 | c.3627_3632del (p.Gln1210_Ser1211del) | 17 | Deletion    | ATP Binding Domain | German                                                                          | 37                                 |
| 594 | c.3629del4                            | 17 | Deletion    | ATP Binding Domain | Swedish                                                                         | 49, 50                             |
| 595 | c.3638G>T (p.Gly1213Val)              | 17 | Missense    | ATP Binding Domain | Kurdish-Jewish                                                                  | 46                                 |
| 596 | p.Gly1213Ser                          | 17 | Missense    | ATP Binding Domain | American                                                                        | 36                                 |
| 597 | c.3643G>T (p.Asp1215Tyr)              | 17 | Missense    | ATP Binding Domain | Japanese                                                                        | 144, 145                           |
| 598 | c.3644A>G (p.Asp1215Gly)              | 17 | Missense    | ATP Binding Domain | Indian (Eastern and Western)                                                    | 13                                 |
| 599 | c.3646G>A (p.Val1216Met)              | 17 | Missense    | ATP Binding Domain | Turkish, German, Taiwanese, Chinese, Spanish, Korean, Chinese-Han               | 1, 23, 26, 42, 46, 47, 55, 59, 102 |
| 600 | c.3649_3654del (p.Val1217_Leu1218del) | 17 | Deletion    | ATP Binding Domain | British, Finnish, Druze-Israeli, Mediterranean, Bulgarian, Hungarian, Bulgarian | 1, 47, 49, 50, 67, 70, 83          |
| 601 | c.3659C>T (p.Thr1220Met)              | 17 | Missense    | ATP Binding Domain | Turkish, German, Polish, Italian, Egyptian                                      | 15, 25, 42, 53, 19                 |
| 602 | c.3661_3663delGGG                     | 17 | Deletion    | ATP Binding Domain | Chinese                                                                         | 81                                 |
| 603 | c.3662G>A (p.Gly1221Glu)              | 17 | Missense    | ATP Binding        | British                                                                         | 38                                 |



|     |                                     |    |                    | Domain             |                                            |            |
|-----|-------------------------------------|----|--------------------|--------------------|--------------------------------------------|------------|
| 604 | c.3664G>A (p.Asp1222Asn)            | 17 | Missense           | ATP Binding Domain | Japanese                                   | 101        |
| 605 | c.3664G>T (p.Asp1222Tyr)            | 17 | Missense           | ATP Binding Domain | Russian                                    | 4          |
| 606 | c.3665A>T (p.Asp1222Val)            | 17 | Missense           | ATP Binding Domain | Turkish                                    | 18, 62     |
| 607 | c.3677C>T (p.Thr1266Ile)            | 17 | Missense           | ATP Binding Domain | Chinese                                    | 9          |
| 608 | c.3679G>C (p.Ala1227Pro)            | 17 | Missense           | ATP Binding Domain | Chinese                                    | 9          |
| 609 | c.3682A>T (p.Arg1228*)              | 17 | Nonsense           | ATP Binding Domain | Chinese                                    | 78         |
| 610 | c.3683G>C (p.Arg1228Thr)            | 17 | Missense           | ATP Binding Domain | Lebanese                                   | 39         |
| 611 | c.3688A>G (p.Ile1230Val)            | 17 | Missense           | ATP Binding Domain | European                                   | 39         |
| 612 | c.3693-3697delins19bp               | 17 | Deletion/Insertion | ATP Binding Domain | American                                   | 36         |
| 613 | c.3694A>C (p.Thr1232Pro)            | 17 | Missense           | ATP Binding Domain | Brazilian, Spanish                         | 8, 26      |
| 614 | c.3699+1G>C                         | 17 | Splice site        | ATP Binding Domain | Spanish                                    | 26         |
| 615 | c.3699+27T>C                        | 17 | Splice site        | ATP Binding Domain | Mediterranean                              | 18, 49     |
| 616 | c.3700delG                          | 17 | Splice site        | ATP Binding Domain | Chinese                                    | 9, 81      |
| 617 | c.3700-2A>T                         | 18 | Splice site        | ATP Binding Domain | Taiwanese                                  | 35, 102    |
| 618 | c.3700-1G>A                         | 18 | Splice site        | ATP Binding Domain | Chinese-Han                                | 23         |
| 619 | c.3700-1delG                        | 18 | Splice site        | ATP Binding Domain | Chinese-Han                                | 17         |
| 620 | c.3707T>C (p.Ile1236Thr)            | 18 | Missense           | ATP Binding Domain | Turkish (Bulgaria)                         | 70         |
| 621 | c.3713_3714del (p. Lys1238Serfs*20) | 18 | Deletion           | ATP Binding Domain | North European, Brazilian, Middle Eastern, | 8, 51, 139 |
| 622 | c.3715G>T (p.Val1239Phe)            | 18 | Missense           | ATP Binding Domain | Chinese                                    | 7          |
| 623 | c.3716T>G (p.Val1239Gly)            | 18 | Missense           | ATP Binding Domain | British                                    | 16         |
| 624 | c.3722C>T (p.Ala1241Val)            | 18 | Missense           | ATP Binding Domain | Indian (South)                             | 44         |
| 625 | c.3731delT (p.Leu1244Argfs*86)      | 18 | Deletion           | ATP Binding Domain | Egyptian                                   | 25         |
| 626 | c.3733C >A (p.Pro1245Thr)           | 18 | Deletion           | ATP Binding Domain | Turkish                                    | 110, 111   |
| 627 | c.3734G>T ( p.1245Leu)              | 18 | Missense           | ATP Binding Domain | Egyptian                                   | 84         |
| 628 | c.3741C>G (p.His1247Gln)            | 18 | Missense           | ATP Binding        | Indian (Eastern and Western)               | 13         |

|     |                                         |    |             | Domain                |                                                                                                                                                                                                                          |                                                                                                                      |
|-----|-----------------------------------------|----|-------------|-----------------------|--------------------------------------------------------------------------------------------------------------------------------------------------------------------------------------------------------------------------|----------------------------------------------------------------------------------------------------------------------|
| 629 | c.3742_3743dup<br>(p.Lys1248Thrfs*83)   | 18 | Duplication | ATP Binding<br>Domain | Italian                                                                                                                                                                                                                  | 15                                                                                                                   |
| 630 | c.3744G>C (p.Lys1248Asn)                | 18 | Missense    | ATP Binding<br>Domain | Chinese-Han                                                                                                                                                                                                              | 17                                                                                                                   |
| 631 | c.3754G>A (p.Val1252Ile)                | 18 | Missense    | ATP Binding<br>Domain | European                                                                                                                                                                                                                 | 132                                                                                                                  |
| 632 | c.3763C>A (p.Leu1255Ile)                | 18 | Missense    | ATP Binding<br>Domain | Korean                                                                                                                                                                                                                   | 82                                                                                                                   |
| 633 | c.3765insAC                             | 18 | Insertion   | ATP Binding<br>Domain | Chinese                                                                                                                                                                                                                  | 10                                                                                                                   |
| 634 | c.3767insCA                             | 18 | Insertion   | ATP Binding<br>Domain | Chinese                                                                                                                                                                                                                  | 58                                                                                                                   |
| 635 | c.3766_3767dupCA<br>(p.Gln1256Profs*75) | 18 | Duplication | ATP Binding<br>Domain | Chinese                                                                                                                                                                                                                  | 7                                                                                                                    |
| 636 | c.3767A>G (p.Gln1256Arg)                | 18 | Missense    | ATP Binding<br>Domain | Indian (North), Indian                                                                                                                                                                                                   | 71, 126                                                                                                              |
| 637 | c.3770_3771insG<br>(p.Asn1257Lysfs*2 )  | 18 | Insertion   | ATP Binding<br>Domain | Indian (North)                                                                                                                                                                                                           | 71                                                                                                                   |
| 638 | c.3772A>T<br>(p.Lys1258*)               | 18 | Nonsense    | ATP Binding<br>Domain | Brazilian                                                                                                                                                                                                                | 8                                                                                                                    |
| 639 | c.3784G>T (p.Val1262Phe)                | 18 | Missense    | ATP Binding<br>Domain | Italian                                                                                                                                                                                                                  | 18, 62                                                                                                               |
| 640 | c.3794_3803del<br>(p.Val1265Glyfs*62)   | 18 | Deletion    | ATP Binding<br>Domain | Czech/Slovak                                                                                                                                                                                                             | 6                                                                                                                    |
| 641 | c.3796G>A (p.Gly1266Arg)                | 18 | Missense    | ATP Binding<br>Domain | British, Hungarian,<br>American, Chinese                                                                                                                                                                                 | 16, 32, 36                                                                                                           |
| 642 | c.3796_3797GG>AA<br>(p.Gly1266Lys)      | 18 | Missense    | ATP Binding<br>Domain | French, British,<br>German                                                                                                                                                                                               | 49, 50                                                                                                               |
| 643 | c.3797G>A (p.Gly1266Glu)                | 18 | Missense    | ATP Binding<br>Domain | Chinese                                                                                                                                                                                                                  | 10                                                                                                                   |
| 644 | c.3797G>T (p.Gly1266Val)                | 18 | Missense    | ATP Binding<br>Domain | American                                                                                                                                                                                                                 | 4                                                                                                                    |
| 645 | c.3799 G>A ( p.Asp1267Asn)              | 18 | Missense    | ATP Binding<br>Domain | Chinese                                                                                                                                                                                                                  | 32                                                                                                                   |
| 646 | c.3800A>C (p.Asp1267Ala)                | 18 | Missense    | ATP Binding<br>Domain | Japanese, Korean                                                                                                                                                                                                         | 82, 114, 138                                                                                                         |
| 647 | c.3800A>G (p.Asp1267Gly)                | 18 | Missense    | ATP Binding<br>Domain | Latvian                                                                                                                                                                                                                  | 146                                                                                                                  |
| 648 | c.3800A>T (p.Asp1267Val )               | 18 | Missense    | ATP Binding<br>Domain | Japanese                                                                                                                                                                                                                 | 39                                                                                                                   |
| 649 | c.3802G>A (p.Gly1268Arg)                | 18 | Missense    | ATP Binding<br>Domain | Chinese-Han                                                                                                                                                                                                              | 147                                                                                                                  |
| 650 | c.3809A>C (p.Asn1270Thr)                | 18 | Missense    | ATP Binding<br>Domain | Bulgarian,<br>Indian (West)                                                                                                                                                                                              | 28                                                                                                                   |
| 651 | c.3809A>G (p.Asn1270Thr)                | 18 | Missense    | ATP Binding<br>Domain | Sicilian, Italian,<br>Turkish, Italian,<br>Costa Rican,<br>Japanese, Korean,<br>French, Spanish-<br>Grand Canaria,<br>Taiwanese, Japanese,<br>German, Chinese-<br>Han, Korean,<br>Bulgarian, Brazilian<br>Korean, Indian | 4, 5, 8, 14, 23,<br>25, 35,<br>36, 44, 49, 50,<br>56, 59, 67, 80,<br>82, 97, 102,<br>104, 114, 119,<br>128, 133, 147 |

|     |                                           |    |             |                    |                                                                             |                             |
|-----|-------------------------------------------|----|-------------|--------------------|-----------------------------------------------------------------------------|-----------------------------|
|     |                                           |    |             |                    | (South), Taiwanese, Chinese-Han, Egyptian, Chinese-Han, Bulgarian, American |                             |
| 652 | c.3809A>G (p.Asn1270Ser)                  | 18 | Missense    | ATP Binding Domain | Czech/Slovak                                                                | 6                           |
| 653 | c.3817C>T (p.Pro1273Leu)                  | 18 | Missense    | ATP Binding Domain | Turkish, Polish, Hungarian, Korean, Hungarian, Egyptian, Chinese - Han      | 19, 23, 25, 53, 55, 83, 138 |
| 654 | c.3818C>T (p.Pro1273Leu)                  | 18 | Missense    | ATP Binding Domain | Egyptian<br>Indian (West)                                                   | 28, 84                      |
| 655 | p.1273Ser                                 | 18 | Missense    | ATP Binding Domain | American                                                                    | 36                          |
| 656 | c.3818C>A (p.Pro1273Gln)                  | 18 | Missense    | ATP Binding Domain | Taiwanese, Egyptian, Chinese-Han, Thai                                      | 23, 25, 34, 119             |
| 657 | c.3829C>T (p.Gln1277*)                    | 18 | Nonsense    | ATP Binding Domain | Turkish (Bulgarian)                                                         | 73                          |
| 658 | c.3832G>A (p.Ala1278Thr)                  | 18 | Missense    | ATP Binding Domain | Indian (Eastern and Western)                                                | 13                          |
| 659 | c.3833C>T (p.Ala1278Val)                  | 18 | Missense    | ATP Binding Domain | Sardinian, American                                                         | 36, 148                     |
| 660 | c.3835G>T (p.Asp1279Tyr)                  | 18 | Missense    | ATP Binding Domain | Bulgarian                                                                   | 70                          |
| 661 | c.3836A>G (p.Asp1279Gly)                  | 18 | Missense    | ATP Binding Domain | Taiwanese                                                                   | 102                         |
| 662 | c.3839_3840insTAC (p.Met1280delinsIleThr) | 18 | Insertion   | ATP Binding Domain | Indian (North)                                                              | 71                          |
| 663 | c.3839insTAC (p.Met1280Ile)               | 18 | Insertion   | ATP Binding Domain | Indian                                                                      | 71                          |
| 664 | c.3841G>T (p.Gly1281Cys)                  | 18 | Missense    | ATP Binding Domain | Chinese-Han                                                                 | 23                          |
| 665 | c.3842G>A (p.Gly1281Asp)                  | 18 | Missense    | ATP Binding Domain | Hungarian, American                                                         | 36, 83                      |
| 666 | c.3843insT                                | 18 | Insertion   | ATP Binding Domain | American, Chinese                                                           | 9, 36                       |
| 667 | c.3843dupT (p.Val1282Cysfs*22)            | 18 | Duplication | ATP Binding Domain | Chinese                                                                     | 32                          |
| 668 | c.3851_3876del                            | 18 | Deletion    | ATP Binding Domain | Chinese                                                                     | 52                          |
| 669 | c.3852_3875del (p.Gly1285_Ile1292del)     | 18 | Deletion    | ATP Binding Domain | Sardinian                                                                   | 14                          |
| 670 | c.3859G>A (p.Gly1287Ser)                  | 18 | Missense    | ATP Binding Domain | British                                                                     | 38                          |
| 671 | c.3863C>G (p.Thr1288Arg)                  | 18 | Missense    | ATP Binding Domain | Sicilian                                                                    | 149                         |
| 672 | c.3863C>T (p.Thr1288Met)                  | 18 | Missense    | ATP Binding Domain | Italian                                                                     | 15                          |
| 673 | c.3871G>A (p.Ala1291Thr)                  | 18 | Missense    | ATP Binding Domain | Chinese                                                                     | 81                          |

|     |                                  |    |             |                                   |                                                                                                                                          |                                                         |
|-----|----------------------------------|----|-------------|-----------------------------------|------------------------------------------------------------------------------------------------------------------------------------------|---------------------------------------------------------|
| 674 | c.3877G>A (p.Glu1293Lys)         | 18 | Missense    | ATP Binding Domain                | Chinese                                                                                                                                  | 33                                                      |
| 675 | c.3884C>T (p.Ala1295Val)         | 18 | Missense    | ATP Binding Domain                | Chinese                                                                                                                                  | 24                                                      |
| 676 | c.3886G>A (p.Asp1296Asn)         | 18 | Missense    | Between ATP Binding Domain & TMS7 | Japanese                                                                                                                                 | 150                                                     |
| 677 | c.3889 G>A (p.Val1297Ile)        | 18 | Missense    | Between ATP Binding Domain & TMS7 | Chinese                                                                                                                                  | 32                                                      |
| 678 | c.3890T>A (p.Val1297Asp)         | 18 | Missense    | Between ATP Binding Domain & TMS7 | Indian (South)                                                                                                                           | 44                                                      |
| 679 | c.3892_3894del (p.Val1298del)    | 18 | Deletion    | Between ATP Binding Domain & TMS7 | Japanese                                                                                                                                 | 151                                                     |
| 680 | c.3895C>T (p.Leu1299Phe)         | 18 | Missense    | Between ATP Binding Domain & TMS7 | Indian (South), Indian (West)                                                                                                            | 28, 44                                                  |
| 681 | c.3895delC (p.Ile1300Serfs*30)   | 18 | Deletion    | Between ATP Binding Domain & TMS7 | Indian (South)                                                                                                                           | 44                                                      |
| 682 | c.3896T>G (p.Leu1299Arg)         | 18 | Missense    | Between ATP Binding Domain & TMS7 | Chinese                                                                                                                                  | 7                                                       |
| 683 | c.3901_3902insA p.Arg1301Lysfs*3 | 18 | Insertion   | Between ATP Binding Domain & TMS7 | Chinese                                                                                                                                  | 7                                                       |
| 684 | c.3901_3902 insA                 | 18 | Insertion   | Between ATP Binding Domain & TMS7 | Chinese                                                                                                                                  | 9                                                       |
| 685 | c.3903+1delG                     | 18 | Splice site | Between ATP Binding Domain & TMS7 | German                                                                                                                                   | 43                                                      |
| 686 | c.3903+6T>C                      | 18 | Splice site | Between ATP Binding Domain & TMS7 | Indian (South)                                                                                                                           | 44                                                      |
| 687 | c.3903+5G>A                      | 18 | Splice site | Between ATP Binding Domain & TMS7 | Chinese                                                                                                                                  | 7                                                       |
| 688 | c.3904-2A>G                      | 19 | Splice site | Between ATP Binding Domain & TMS7 | Italian, Sicilian, Greek, Egyptian                                                                                                       | 1, 4, 14, 25, 41, 47                                    |
| 689 | c.3912G>T ( p.Leu1304Phe)        | 19 | Missense    | Between ATP Binding Domain & TMS7 | Danish                                                                                                                                   | 72                                                      |
| 690 | c.3928A>C (p.Ser1310Arg)         | 19 | Missense    | Between ATP Binding Domain & TMS7 | Italian                                                                                                                                  | 19                                                      |
| 691 | c.3955C>T (p.Arg1319stop)        | 19 | Nonsense    | Between ATP Binding Domain & TMS7 | British, Italian, North European, Middle Eastern, British, Mediterranean, Sicilian, Spanish, Brazilian, Egyptian, Chinese- Han, American | 4, 8, 14, 18, 23, 25, 26, 36, 49, 50, 51, 62, 139, 152, |
| 692 | c.3960G>C (p.Arg1320Ser)         | 19 | Missense    | Between ATP Binding Domain & TMS7 | Chinese-Han, Anglo Saxon, Italian, Chinese                                                                                               | 23, 24                                                  |

|     |                                    |    |             |                                   |                                                      |                      |
|-----|------------------------------------|----|-------------|-----------------------------------|------------------------------------------------------|----------------------|
| 693 | p.Arg1320*                         | 19 | Nonsense    | Between ATP Binding Domain & TMS7 | British                                              | 49, 50               |
| 694 | c.3965G>C (p.Arg1322Pro)           | 19 | Missense    | Between ATP Binding Domain & TMS7 | Anglo Saxon, Italian                                 | 4, 15                |
| 695 | c.3971A>C (p.Asn1324Thr)           | 19 | Missense    | TMS7                              | Latvian                                              | 146                  |
| 696 | c.3973dupC (p.Leu1325Profs*8)      | 19 | Duplication | TMS7                              | Greek, Cypriot                                       | 48                   |
| 697 | c.3979C>G (p.Leu1327Val)           | 19 | Missense    | TMS7                              | Turkish                                              | 18, 62               |
| 698 | c.3982G>A (p.Ala1328Thr)           | 19 | Missense    | TMS7                              | Taiwanese                                            | 39                   |
| 699 | c.3992A>C (p.Tyr1331Ser)           | 19 | Missense    | TMS7                              | Irish                                                | 38                   |
| 700 | c.3992T>G (p.Tyr1331*)             | 19 | Missense    | TMS7                              | Chinese                                              | 127                  |
| 701 | c.3994A>G (p.Asn1332Asp)           | 19 | Missense    | TMS7                              | Egyptian                                             | 25                   |
| 702 | c.3996C>A (p.Asn1332Lys)           | 19 | Missense    | TMS7                              | Italian                                              | 15                   |
| 703 | c.4001T>A (p.Val1334Asp)           | 19 | Missense    | TMS7                              | Chinese-Han                                          | 23                   |
| 704 | c.4003 G>C (p.Gly1335Arg)          | 19 | Missense    | TMS7                              | Chinese                                              | 32                   |
| 705 | c.4006delA                         | 19 | Missense    | TMS7                              | Chinese                                              | 10                   |
| 706 | c.4007T>C (p.Ile1336Thr)           | 19 | Missense    | TMS7                              | Japanese                                             | 97                   |
| 707 | c.4021G>A (p.Gly1341Ser)           | 19 | Missense    | TMS7                              | Saudi Arabian, Indian (South), Indian (West)         | 28, 44, 88, 153, 154 |
| 708 | c.4021G>C (p.Gly1341Arg)           | 19 | Missense    | TMS7                              | Egyptian                                             | 25                   |
| 709 | c.4021+3A>G                        | 19 | Splice site | TMS7                              | Indian (South)                                       | 44                   |
| 710 | c.4021+87_4125-1del                | 19 | Deletion    | TMS7                              | Turkish                                              | 155                  |
| 711 | c.4022G>T (p.Gly1341Val)           | 20 | Missense    | TMS7                              | Ukranian, Hungarian                                  | 38, 83               |
| 712 | c.4022G>A (p.Gly1341Asp)           | 20 | Missense    | TMS7                              | Egyptian                                             | 84                   |
| 713 | p.Ile1348Asn                       | 20 | Missense    | TMS7                              | Taiwanese                                            | 2                    |
| 714 | c.4051C>T (p.Gln1351*)             | 20 | Nonsense    | TMS8                              | European (German, Polish), Polish, German, Hungarian | 53, 83, 94, 156      |
| 715 | c.4054C>T (p.Pro1352Ser)           | 20 | Missense    | TMS8                              | Bulgarian                                            | 70                   |
| 716 | c.4055C>T (p.Pro1352Leu)           | 20 | Missense    | TMS8                              | Bulgarian                                            | 70                   |
| 717 | c.4055C>G (p.Pro1352Arg)           | 20 | Missense    | TMS8                              | Italian                                              | 15                   |
| 718 | c.4057T>C/A (p.Trp1353Arg)         | 20 | Missense    | TMS8                              | Italian                                              | 4                    |
| 719 | c.4058G>A (p.Trp1353*)             | 20 | Nonsense    | TMS8                              | British                                              | 16                   |
| 720 | c.4059G>A (p.Trp1353*)             | 20 | Nonsense    | TMS8                              | Chinese                                              | 7                    |
| 721 | p.Gly1355Asp                       | 20 | Missense    | TMS8                              | Taiwanese                                            | 2                    |
| 722 | c.4063G>A (p.Gly1355Ser)           | 20 | Missense    | TMS8                              | N. European, Middle Eastern, Czech/Slovak            | 6, 51                |
| 723 | c.4070C>T (p.Ala1357Val)           | 20 | Missense    | TMS8                              | Indian (West)                                        | 28                   |
| 724 | c.4072G>T(p.Ala1358Ser)            | 20 | Missense    | TMS8                              | Italian                                              | 1, 47                |
| 725 | c.4077G>C (p.Met1359Ile)           | 20 | Missense    | TMS8                              | British                                              | 39                   |
| 726 | c.4085_4086del (p.Ser1362Phefs*15) | 20 | Deletion    | TMS8                              | German                                               | 56, 57               |
| 727 | c.4088C>T (p.Ser1363Phe)           | 20 | Missense    | TMS8                              | Turkish                                              | 18, 62               |
| 728 | c.4089-4090delTG                   | 20 | Deletion    | TMS8                              | American                                             | 36                   |

|     |                                        |    |             |            |                                                 |                      |
|-----|----------------------------------------|----|-------------|------------|-------------------------------------------------|----------------------|
| 729 | c.4091_4092del<br>(p.Ser1365Cysfs*12)  | 20 | Deletion    | TMS8       | British,<br>North European,<br>British, Finnish | 4, 16, 40, 49,<br>50 |
| 730 | c.4094delTG                            | 20 | Deletion    | TMS8       | British                                         | 49, 50               |
| 731 | c.4094_4097delCTGT                     | 20 | Deletion    | TMS8       | Chinese                                         | 81                   |
| 732 | c.4094_4097del<br>(p.Ser1365Trpfs*27 ) | 20 | Deletion    | TMS8       | Chinese-Han                                     | 17                   |
| 733 | c.4097_4098del<br>(p.Val1366Glyfs*11)  | 20 | Deletion    | TMS8       | Japanese                                        | 114                  |
| 734 | c.4103T>C (p.Leu1368Pro)               | 20 | Missense    | TMS8       | Bulgarian                                       | 70                   |
| 735 | c.4106C>T (p.Ser1369Leu)               | 20 | Missense    | TMS8       | Italian                                         | 15                   |
| 736 | c.4112T>C (p.Leu1371Pro)               | 20 | Missense    | TMS8       | Chinese-Han, Thai                               | 23, 34               |
| 737 | c.4114C>T (p.Gln1372*)                 | 20 | Nonsense    | TMS8       | Chinese-Han, Thai                               | 17, 34               |
| 738 | c.4118T>C (p.Leu1373Pro)               | 20 | Missense    | TMS8       | Japanese                                        | 97                   |
| 739 | c.4118T>G (p.Leu1373Arg )              | 20 | Missense    | TMS8       | Brazilian                                       | 8                    |
| 740 | c.4124G>C (p.Cys1375Ser)               | 20 | Missense    | TMS8       | Ukrainian                                       | 38                   |
| 741 | IVS20+5 G>A                            | 20 | Splice site | TMS8       | Chinese                                         | 32                   |
| 742 | IVS20+6T>C                             | 20 | Splice site | TMS8       | Egyptian                                        | 84                   |
| 743 | IVS20-2A>G                             | 20 | Splice site | TMS8       | Danish                                          | 72                   |
| 744 | c.4125-1G>A                            | 21 | Splice site | After TMS8 | Greek                                           | 41                   |
| 745 | c.4135C>T (p.Pro1379Ser)               | 21 | Missense    | After TMS8 | Italian                                         | 38                   |
| 746 | c.4153dupG<br>(p.Glu1385Glyfs*24)      | 21 | Duplication | After TMS8 | Chinese                                         | 63                   |
| 747 | c.4162delG (p.Ala1388Argfs*5)          | 21 | Deletion    | After TMS8 | Chinese                                         | 7                    |
| 748 | p.Met1392Lys                           | 21 | Missense    | After TMS8 | Taiwanese                                       | 2                    |
| 749 | c.4195delC<br>(p.Gln1399Argfs*6)       | 21 | Deletion    | After TMS8 | Saudi Arabian                                   | 157, 158, 159        |
| 750 | c.4196A>G (p.Gln1399Arg)               | 21 | Missense    | After TMS8 | Saudi Arabian                                   | 153                  |
| 751 | c.4230G>A (p.Trp1410*)                 | 21 | Nonsense    | After TMS8 | Egyptian                                        | 25                   |
| 752 | c.4272T>G (p.Tyr1424*)                 | 21 | Nonsense    | After TMS8 | Chinese                                         | 7                    |
| 753 | c.4301C>T (p.Thr1434Met)               | 21 | Missense    | C Terminus | Italian, Egyptian                               | 18, 25, 62           |
| 754 | c.4310dupA<br>(p.Pro1438Alafs*11)      | 21 | Duplication | C Terminus | Indian                                          | 71,125               |
| 755 | c.4311insA (p.Lys1437Lys)              | 21 | Insertion   | C Terminus | Indian                                          | 71                   |
| 756 | p.Ala1445Pro                           | 21 | Missense    | C Terminus | Taiwanese                                       | 2                    |
| 757 | c.4374_4375del<br>(p.Arg1459Glyfs*2)   | 21 | Deletion    | C Terminus | Serbian                                         | 15                   |
| 758 | c.4396T>G (p.Stop1466ArgextX2)         | 21 | Extension   | C Terminus | Greek, Sardinian,<br>Greek,<br>Greek, Cypriot   | 1, 41, 47, 48        |

## References

1. Loudianos G, Dessi V, Lovicu M, Angius A, Nurchi A, Sturniolo GC et al. Further delineation of the molecular pathology of Wilson disease in the Mediterranean population. *Hum. Mutat.* 1998;12: 89-94.
2. Wan L, Tsai CH, Hsu CM, Huang CC, Yang CC, Liao CC et al. Mutation analysis and characterization of alternative splice variants of the Wilson disease gene *ATP7B*. *Hepatology.* 2010;52:1662-1670.
3. Nanji MS, Nguyen VT, Kawasoe JH, Inui K, Endo F, Nakajima T et al. Haplotype and mutation analysis in Japanese patients with Wilson disease. *Am. J. Hum. Genet.* 1997;60:1423-1429.

4. Shah AB, Chernov I, Zhang HT, Ross BM, Das K, Lutsenko S et al. Identification and analysis of mutations in the Wilson disease gene (*ATP7B*): population frequencies, genotype-phenotype correlation, and functional analyses. *Am. J. Hum. Genet.* 1997;61: 317-328.
5. Wu ZY, Wang N, Lin MT, Fang L, Murong SX, Yu L. Mutation analysis and the correlation between genotype and phenotype of Arg778Leu mutation in chinese patients with Wilson disease. *Arch. Neurol.* 2001;58: 971-976.
6. Vrabelova S, Letocha O, Borsky M, Kozak L. Mutation analysis of the *ATP7B* gene and genotype/phenotype correlation in 227 patients with Wilson disease. *Mol. Genet. Metab.* 2005;86: 277-285.
7. Dong Y, Ni W, Chen WJ, Wan B, Zhao GX, Shi ZQ. Spectrum and Classification of *ATP7B* variants in a large cohort of Chinese patients with Wilson's disease guides genetic diagnosis. *Theranostics.* 2016;6: 638-649.
8. Deguti MM, Genschel J, Cancado EL, Barbosa ER, Bochow B, Mucenic M et al. Wilson disease: novel mutations in the *ATP7B* gene and clinical correlation in Brazilian patients. *Hum. Mutat.* 2004;23: 398.
9. Hua R, Hua F, Jiao Y, Pan Y, Yang X, Peng S et al. Mutational analysis of *ATP7B* in Chinese Wilson disease patients. *Am. J. Transl. Res.* 2016;8: 2851-2861.
10. Li K, Zhang WM, Lin S, Wen L, Wang ZF, Xie D et al. Mutational analysis of *ATP7B* in north Chinese patients with Wilson disease. *J. Hum. Genet.* 2013;58: 67-72.
11. Gupta A, Aikath D, Neogi R, Datta S, Basu K, Maity B et al. Molecular pathogenesis of Wilson disease: haplotype analysis, detection of prevalent mutations and genotype-phenotype correlation in Indian patients. *Hum. Genet.* 2005;118: 49-57.
12. Ray K, Gupta A. Gene symbol: *ATP7B*. Disease: Wilson's disease. *Hum. Genet.* 2005;118: 541.
13. Mukherjee S, Dutta S, Majumdar S, Biswas T, Jaiswal P, Sengupta M et al. Genetic defects in Indian Wilson disease patients and genotype-phenotype correlation. *Parkinsonism. Relat. Disord.* 2014; 20: 75-81.
14. Figus A, Angius A, Loudianos G, Bertini C, Dessi V, Loi A et al. Molecular pathology and haplotype analysis of Wilson disease in Mediterranean populations. *Am. J. Hum. Genet.* 1995;57: 1318-1324.
15. Lepori MB, Lovicu M, Dessi V, Zappu A, Incollu S, Zancan L et al. Twenty-four novel mutations in Wilson disease patients of predominantly Italian origin. *Genet. Test.* 2007;11: 328-332.
16. Curtis D, Durkie M, Balac (Morris) P, Sheard D, Goodeve A, Peake I et al. A study of Wilson disease mutations in Britain. *Hum. Mutat.* 1999;14: 304-311.
17. Gu YH, Kodama H, Du SL, Gu QJ, Sun HJ, Ushijima H. Mutation spectrum and polymorphisms in *ATP7B* identified on direct sequencing of all exons in Chinese Han and Hui ethnic patients with Wilson's disease. *Clin. Genet.* 2003;64: 479-484.
18. Loudianos G, Dessi V, Lovicu M, Angius A, Altuntas B, Giacchino R et al. Mutation analysis in patients of Mediterranean descent with Wilson disease: identification of 19 novel mutations. *J. Med. Genet.* 1999;36: 833-836.
19. Loudianos G, Dessi V, Angius A, Lovicu M, Loi A, Deiana M et al. Wilson disease mutations associated with uncommon haplotypes in Mediterranean patients. *Hum. Genet.* 1996;98: 640-642.
20. Ye S, Gong L, Shui QX, Zhou LF. Wilson disease: identification of two novel mutations and clinical correlation in Eastern Chinese patients. *World. J. Gastroenterol.* 2007;13: 5147-5150.
21. Genschel J, Sommer G, Haas R, Buettner C, Bochow B, Manns M et al. Three novel mutations, c314C>A, C778insC, and c1285+2T>A, in exon 2 of the Wilson disease gene. *Hum. Mutat.* 2000;16: 1023-1033.
22. Lam CW, Mak CM. Allele dropout in PCR-based diagnosis of Wilson disease: mechanisms and solutions. *Clin. Chem.* 2006;52: 517-520.
23. Mak CM, Lam CW, Tam S, Lai CL, Chan LY, Fan ST et al. Mutational analysis of 65 Wilson disease patients in Hong Kong Chinese: identification of 17 novel mutations and its genetic heterogeneity. *J. Hum. Genet.* 2008;53: 55-63.
24. Gu S, Yang H, Qi Y, Deng X, Zhang L, Guo Y et al. Novel ATPase Cu<sup>2+</sup> transporting beta polypeptide mutations in Chinese families with Wilson's disease. *PLoS One.* 2013;8: e66526.
25. Abdelghaffar TY, Elsayed SM, Elsobky E, Bochow B, Buttner J, Schmidt H. Mutational analysis of *ATP7B* gene in Egyptian children with Wilson disease: 12 novel mutations. *J. Hum. Genet.* 2008;53: 681-687.
26. Margarit E, Bach V, Gomez D, Bruguera M, Jara P, Queralt R et al. Mutation analysis of Wilson disease in the Spanish population -identification of a prevalent substitution and eight novel mutations in the *ATP7B* gene. *Clin. Genet.* 2005;68: 61-68.
27. Loudianos G, Kostic V, Solinas P, Lovicu M, Dessi V, Svetel M et al. Characterization of the molecular defect in the *ATP7B* gene in Wilson disease patients from Yugoslavia. *Genet. Test.* 2003;7: 107-112.
28. Aggarwal A, Chandhok G, Todorov T, Parekh S, Tilve S, Zibert A et al. Wilson disease mutation pattern with genotype-phenotype correlations from Western India: confirmation of p.C271\* as a common Indian mutation and identification of 14 novel mutations. *Ann. Hum. Genet.* 2013;77: 299-307.
29. Dedoussis GV, Genschel J, Sialvera TE, Bochow B, Manolaki N, Manios Y et al. Wilson disease: high prevalence in a mountainous area of Crete. *Ann. Hum. Genet.* 2005;69: 268-274.
30. Cheng, N., submitted to <http://www.wilsondisease.med.ualberta.ca/database.asp>.
31. Okada T, Shiono Y, Hayashi H, Satoh H, Sawada T, Suzuki A et al. Mutational analysis of *ATP7B* and genotype-phenotype correlation in Japanese with Wilson's disease. *Hum. Mutat.* 2000;15: 454-462.
32. Li XH, Lu Y, Ling Y, Fu QC, Xu J, Zang GQ et al. Clinical and molecular characterization of Wilson's disease in China: identification of 14 novel mutations. *BMC Med. Genet.* 2011;12: 1-13.
33. Lepori MB, Zappu A, Incollu S, Dessi V, Mamei E, Demelia L et al. Mutation analysis of the *ATP7B* gene in a new group of Wilson's disease patients: contribution to diagnosis. *Mol. Cell. Probes.* 2012;26: 147-150.
34. Panichareon B, Taweechue K, Thongnoppakhun W, Aksornworanart M, Pithukpakorn M, Yenchitsomanus PT et al. Six novel *ATP7B* mutations in Thai patients with Wilson disease. *Eur. J. Med. Genet.* 2011;54: 103-107.

35. Tsai CH, Tsai FJ, Wu JY, Chang JG, Lee CC, Lin SP et al. Mutation analysis of Wilson disease in Taiwan and description of six new mutations. *Hum. Mutat.* 1998;12: 370-376.
36. Kuppala D, Deng J, Brewer GJ, Wang MW, Borjigin J. Wilson disease mutations in the American population: identification of five novel mutations in *ATP7B*. *The Open Hepatology Journal.* 2009;1: 1-4.
37. Wildenauer, D. personal communication.
38. Cox DW, Prat L, Walshe JM, Heathcote J, Gaffney D. Twenty-four novel mutations in Wilson disease patients of predominantly European ancestry. *Hum. Mutat.* 2005;26: 1-7.
39. Davies LP, Macintyre G, Cox DW. New mutations in the Wilson disease gene, *ATP7B*: implications for molecular testing. *Genet. Test.* 2008;12: 139-145.
40. Chappuis P, Callebert J, Quignon V, Woimant F, Laplanche JL. Late neurological presentations of Wilson disease patients in French population and identification of 8 novel mutations in the *ATP7B* gene. *J. Trace. Elem. Med. Biol.* 2007;21: 37-42.
41. Loudianos G, Lovicu M, Solinas P, Kanavakis E, Tzetis M, Manolaki N et al. Delineation of the spectrum of Wilson disease mutations in the Greek population and the identification of six novel mutations. *Genet. Test.* 2000;4: 399-402.
42. Haas R, Gutierrez-Rivero B, Knoche J, Boker K, Manns MP, Schmidt HH. Mutation analysis in patients with Wilson disease: identification of 4 novel mutations. *Mutation in brief no. 250. Hum. Mutat.* 1999;14: 1-8.
43. Duc HH, Hefter H, Stremmel W, Castaneda-Guillot C, Hernandez Hernandez A, Cox DW et al. His1069Gln and six novel Wilson disease mutations: analysis of relevance for early diagnosis and phenotype. *Eur. J. Hum. Genet.* 1998;6: 616-623.
44. Santhosh S, Shaji RV, Eapen CE, Jayanthi V, Malathi S, Chandy M et al. *ATP7B* mutations in families in a predominantly Southern Indian cohort of Wilson's disease patients. *Indian. J. Gastroenterol.* 2006;25: 277-282.
45. Asifa M, submitted to <http://www.wilsondisease.med.ualberta.ca/database.asp>.
46. Kalinsky H, Funes A, Zeldin A, Pel-Or Y, Korostishevsky M, Gershoni-Baruch R et al. Novel *ATP7B* mutations causing Wilson disease in several Israeli ethnic groups. *Hum. Mutat.* 1998;11: 145-151.
47. Loudianos G, Dessi V, Lovicu M, Angius A, Kanavakis E, Tzetis M et al. Haplotype and mutation analysis in Greek patients with Wilson disease. *Eur. J. Hum. Genet.* 1998;6: 487-491.
48. Butler P, McIntyre N, Mistry PK. Molecular diagnosis of Wilson disease. *Mol. Genet. Metab.* 2001;72: 223-230.
49. Thomas GR, Forbes JR, Roberts EA, Walshe JM, Cox DW. The Wilson disease gene: spectrum of mutations and their consequences. *Nat. Genet.* 1995;9: 210-217.
50. Thomas GR, Roberts EA, Walshe JM, Cox DW. Haplotypes and mutations in Wilson disease. *Am. J. Hum. Genet.* 1995;56: 1315-1319.
51. Waldenstrom E, Lagerkvist A, Dahlman T, Westermarck K, Landegren U. Efficient detection of mutations in Wilson disease by manifold sequencing. *Genomics.* 1996;37: 303-309.
52. Wei Z, Huang Y, Liu A, Diao S, Yu Q, Peng Z et al. Mutational characterization of *ATP7B* gene in 103 Wilson's disease patients from Southern China: identification of three novel mutations. *Neuroreport.* 2014;25: 1075-1080.
53. Gromadzka G, Schmidt HH, Genschel J, Bochow B, Rodo M, Tarnacka B et al. Frameshift and nonsense mutations in the gene for ATPase 7B are associated with severe impairment of copper metabolism and with an early clinical manifestation of Wilson's disease. *Clin. Genet.* 2005;68: 524-534.
54. Prat Davies LM, Bugbee D. submitted to <http://www.wilsondisease.med.ualberta.ca/database.asp>.
55. Park S, Park JY, Kim GH, Choi JH, Kim KM, Kim JB et al. Identification of novel *ATP7B* gene mutations and their functional roles in Korean patients with Wilson disease. *Hum. Mutat.* 2007;28: 1108-1113.
56. Caca K, Ferenci P, Kuhn HJ, Polli C, Willgerodt H, Kunath B et al. High prevalence of the H1069Q mutation in East German patients with Wilson disease: rapid detection of mutations by limited sequencing and phenotype-genotype analysis. *J. Hepatol.* 2001;35: 575-581.
57. Huster D, Hoppert M, Lutsenko S, Zinke J, Lehmann C, Mossner J et al. Defective cellular localization of mutant *ATP7B* in Wilson's disease patients and hepatoma cell lines. *Gastroenterol.* 2003;124: 335-345.
58. Liu Y, Zhou H, Guo H, Bai Y. Genetic and clinical analysis in a cohort of patients with Wilson's disease in Southwestern China. *Arch. Med. Res.* 2015;46: 164-169.
59. Liu XQ, Zhang YF, Liu TT, Hsiao KJ, Zhang JM, Gu XF et al. Correlation of *ATP7B* genotype with phenotype in Chinese patients with Wilson disease. *World. J. Gastroenterol.* 2004;10: 590-593.
60. de Bie P, Muller P, Wijmenga C, Klomp LW. Molecular pathogenesis of Wilson and Menkes disease: correlation of mutations with molecular defects and disease phenotypes. *J. Med. Genet.* 2007; 44: 673-688.
61. Hamza I, Schaefer M, Klomp LW, Gitlin JD. Interaction of the copper chaperone HAH1 with the Wilson disease protein is essential for copper homeostasis. *Proc. Natl. Acad. Sci. U S A.* 1999;96: 13363-13368.
62. Loudianos G, Dessi V, Lovicu M, Angius A, Pirastu M, Cao A. Haplotype and mutation analysis in Mediterranean patients with Wilson disease. *J. Trace. Elem. Exp. Med.* 1999;12: 315-319.
63. Yang J, Chan P. Gene symbol: *ATP7B*. Disease: Wilson's disease. *Hum. Genet.* 2005;118: 539.
64. Kroll CA, Ferber MJ, Dawson BD, Jacobson RM, Mensink KA, Lorey F et al. Retrospective determination of ceruloplasmin in newborn screening blood spots of patients with Wilson disease. *Mol. Genet. Metab.* 2006;89: 134-138.
65. Hofer H, Willheim-Polli C, Knoflach P, Gabriel C, Vogel W, Trauner M et al. Identification of a novel Wilson disease gene mutation frequent in upper Austria: a genetic and clinical study. *J. Hum. Genet.* 2012;57: 564-567..
66. Paptheodorou, A., submitted to <http://www.wilsondisease.med.ualberta.ca/database.asp>.
67. Kempainen R, Palatsi R, Kallioinen M, Oikarinen A. A homozygous nonsense mutation and a combination of two mutations of the Wilson disease gene in patients with different lysyl oxidase activities in cultured fibroblasts. *J. Invest. Dermatol.* 1997;108: 35-39.
68. Fan Y, Yu L, Han Y, Ren M, Yang R, Zhao S. Identification of three novel insertion/deletion mutations in Wilson disease's gene. *Biochem. Genet.* 2004;42: 377-384.
69. Loudianos G, Lovicu M, Dessi V, Tzetis M, Kanavakis E, Zancan L et al. Abnormal mRNA splicing resulting from consensus sequence splicing mutations of *ATP7B*. *Hum. Mutat.* 2002;20: 260-266.
70. Todorov, T. et al. Spectrum of mutations in the Wilson disease gene (*ATP7B*) in the Bulgarian population. *Clin. Genet.* 68, 474-476 (2005).
71. Kumar S, Thapa BR, Kaur G, Prasad R. Identification and molecular characterization of 18 novel mutations in the *ATP7B* gene from Indian Wilson disease patients: genotype. *Clin. Genet.* 2005;67: 443-445.
72. Moller LB, Horn N, Jeppesen TD, Vissing J, Wibrand F, Jennum P et al. Clinical presentation and mutations in Danish patients with Wilson disease. *Eur. J. Hum. Genet.* 2011;19: 935-941.



73. Todorov T., submitted to <http://www.wilsondisease.med.ualberta.ca/database.asp>.
74. Shimizu N, Kawase C, Nakazono H, Hemmi H, Shimatake H, Aoki T. A novel RNA splicing mutation in Japanese patients with Wilson disease. *Biochem. Biophys. Res. Commun.* 1995;217: 16-20.
75. Gupta A, Chattopadhyay I, Dey S, Nasipuri P, Das SK, Gangopadhyay PK et al. Molecular pathogenesis of Wilson disease among Indians: a perspective on mutation spectrum in *ATP7B* gene, prevalent defects, clinical heterogeneity and implication towards diagnosis. *Cell. Mol. Neurobiol.* 2007;27: 1023-1033.
76. Gupta A, Maulik M, Nasipuri P, Chattopadhyay I, Das SK, Gangopadhyay PK et al. Molecular diagnosis of Wilson disease using prevalent mutations and informative single-nucleotide polymorphism markers. *Clin. Chem.* 2007;53: 1601-1608.
77. Kim EK, Yoo OJ, Song KY, Yoo HW, Choi SY, Cho SW et al. Identification of three novel mutations and a high frequency of the Arg778Leu mutation in Korean patients with Wilson disease. *Hum. Mutat.* 1998;11: 275-278.
78. Wang, L. H. *et al.* Mutation analysis of 73 southern Chinese Wilson's disease patients: identification of 10 novel mutations and its clinical correlation. *J. Hum. Genet.* 56, 660-665 (2011).
79. Seidel J, Caca K, Schwab SG, Berr F, Wildenauer DB, Mentzel HJ et al. Disturbed copper transport in humans. Part 2: mutations of the *ATP7B* gene lead to Wilson disease (WD). *Cell. Mol. Biol.* 2001;47: 149-157.
80. Garcia-Villarreal L, Daniels S, Shaw SH, Cotton D, Galvin M, Geskes J et al. High prevalence of the very rare Wilson disease gene mutation Leu708Pro in the Island of Gran Canaria (Canary Islands, Spain): a genetic and clinical study. *Hepatology.* 2000;32: 1329-1336.
81. Zong Y, Kong X. Mutation analysis of 35 Wilson's disease pedigrees. *Zhonghua. Yi. Xue. Yi. Chuan. Xue. Za. Zhi.* 2016;33: 30-33.
82. Yoo HW. Identification of novel mutations and the three most common mutations in the human *ATP7B* gene of Korean patients with Wilson disease. *Genet. Med.* 2002;4: 43S-48S.
83. Folhoffer A, Ferenci P, Csak T, Horvath A, Hegedus D, Firneisz G et al. Novel mutations of the *ATP7B* gene among 109 Hungarian patients with Wilson's disease. *Eur. J. Gastroenterol. Hepatol.* 2007;19: 105-111.
84. Ghaffar TYA, Elsayed SM, Elnaghy S, Shadeed A, Elsobky ES, Schmidt H. Phenotypic and genetic characterization of a cohort of pediatric Wilson disease patients. *BMC Pediatr.* 2011;11: 56.
85. Yuan ZF. *et al.* Novel mutations of the *ATP7B* gene in Han Chinese families with pre-symptomatic Wilson's disease. *World. J. Pediatr.* 11, 255-260 (2015).
86. Zhu Y, Deng SY, Wan CM. A young boy with elevated aminotransferases in physical examination--Two novel missense mutations associated with Wilson's disease were found. *Zhongguo. Dang. Dai. Er. Ke. Za. Zhi.* 2015;17: 741-743.
87. Lovicu M, Lepori MB, Incollu S, Dessi V, Zappu A, Iorio R et al. RNA analysis of consensus sequence splicing mutations: implications for the diagnosis of Wilson disease. *Genet. Test. Mol. Biomarkers.* 2009;13: 185-191.
88. Zappu A, Magli O, Lepori MB, Dessi V, Diana S, Incollu S et al. High incidence and allelic homogeneity of Wilson disease in 2 isolated populations: a prerequisite for efficient disease prevention programs. *J. Pediatr. Gastroenterol. Nutr.* 2008;47: 334-338.
89. Firneisz G, Lakatos PL, Szalav F, Polli C, Glant TT, Ferenci P. Common mutations of *ATP7B* in Wilson disease patients from Hungary. *Am. J. Med. Genet.* 2002;108: 23-28.
90. Vrabelova S, Vanova P, Kopeckova L, Trunecka P. Molecular analysis of Wilson disease. *Cas. Lek. Cesk.* 2002;141: 642-645.
91. Al Jumah M, Majumdar R, Al Rajeh S, Awada A, Al Zaben, Traif A et al. A clinical and genetic study of 56 Saudi Wilson disease patients: identification of Saudi-specific mutations. *Eur. J. Neurol.* 2004;11: 121-124.
92. Caprai S, Loudianos G, Massei F, Gori L, Lovicu, Maggiore G. Direct diagnosis of Wilson disease by molecular genetics. *J. Pediatr.* 2006;148: 138-140.
93. Xu P, Liang X, Jankovic J, Le W. Identification of a high frequency of mutation at exon 8 of the *ATP7B* gene in a Chinese population with Wilson disease by fluorescent PCR. *Arch. Neurol.* 2001;58: 1879-1882.
94. Genschel J, Czlonkowska A, Sommer G, Buettner C, Bochow B, Lochs H et al. Three novel mutations (P760L, L1305P, Q1351Stop) causing Wilson disease. *Hum. Mutat.* 2001;17: 156.
95. Eapen CE, Santhosh S, Shaji RV, Chandy M, Chandy GM. Gene symbol: *ATP7B*. Disease: Wilson's disease. *Hum. Genet.* 2004;114: 606.
96. Forbes JR, Cox DW. Functional characterization of missense mutations in *ATP7B*: Wilson disease mutation or normal variant? *Am. J. Hum. Genet.* 1998;63: 1663-1674.
97. Bost M, Lachaux A, Accominotti M, Vandenberghe A. Mutation screening and genotype-phenotype correlation in 32 families with Wilson disease. *J. Trace. Elem. Exp. Med.* 1999;12: 321-329.
98. Forbes JR, Cox DW. Copper-dependent trafficking of Wilson disease mutant *ATP7B* proteins. *Hum. Mol. Genet.* 2000;9: 1927-1935.
99. Pendlebury ST, Rothwell PM, Dalton A, Burton EA. Strokelike presentation of Wilson disease with homozygosity for a novel T766R mutation. *Neurology.* 2004;63: 1982-1983.
100. Brage A, Tome S, García A, Carracedo A, Salas A. Clinical and molecular characterization of Wilson disease in Spanish patients. *Hepatol. Res.* 2007;37: 18-26.
101. Shimizu N, Nakazono H, Takeshita Y, Ikeda C, Fujii H, Watanabe A et al. Molecular analysis and diagnosis in Japanese patients with Wilson's disease. *Pediatr. Int.* 1999;41: 409-413.
102. Lee CC, Wu JY, Tsai FJ, Kodama H, Abe T, Yang CF et al. Molecular analysis of Wilson disease in Taiwan: identification of one novel mutation and evidence of haplotype-mutation association. *J. Hum. Genet.* 2000;45: 275-279.
103. Mak CM, Tam S, Fan ST, Liu CL, Lam CW. Wilson's disease: a patient undiagnosed for 18 years. *Hong. Kong. Med. J.* 2006;12: 154-158.
104. Okada T, Morise T, Takeda Y, Mabuchi H. A new variant deletion of a copper-transporting P-type ATPase gene found in patients with Wilson's disease presenting with fulminant hepatic failure. *J. Gastroenterol.* 2000;35: 278-283.
105. Zali N, Mohebbi SR, Esteghamat S, Chiani M, Haghighi MM, Hosseini-Asl SMK et al. Prevalence of *ATP7B* gene mutations in Iranian patients with Wilson disease. *Hepat. Mon.* 2011;11: 890-894.
106. Chuang LM, Wu HP, Jang MH, Wang TR, Sue WC, Lin BJ et al. High frequency of two mutations in codon 778 in exon 8 of the *ATP7B* gene in Taiwanese families with Wilson disease. *J. Med. Genet.* 1996;33: 521-523.
107. Zhang DF, Teng JF. Direct sequencing of mutations in the copper-transporting P-type adenosine triphosphate (*ATP7B*) gene for diagnosis and pathogenesis of Wilson's disease. *Genet. Mol. Res.* 2016;15: 1-9.
108. Dastsooz H, Dehghani SM, Imanieh MH, Haghighat M, Moini M, Fardaei M. A new *ATP7B* gene mutation with severe condition in two unrelated Iranian families with Wilson disease. *Gene.* 2013;514: 48-53.
109. Manoochehri J, Dehshiri RM, Faraji H, Mohammadi S, Dastsooz H, Moradi T et al. Family screening for a novel *ATP7B* gene mutation, c.2335T>G, in the south of Iran. *Iran. J. Ped. Hematol. Oncol.* 2014;4: 26-31.

110. Simsek PO, Akman SA, Cakmur R, Terzioglu O. Mutation analysis of ATP7B gene in Turkish Wilson disease patients: identification of five novel mutations. *Eur. J. Med. Genet.* 2013;56: 175-179.
111. Papur, O.S., submitted to <http://www.wilsondisease.med.ualberta.ca/database.asp>
112. Owada M, Suzuki K, Fukushi M, Yamauchi K, Kitagawa T. Mass screening for Wilson's disease by measuring urinary holoceruloplasmin. *J. Pediatr.* 2002;140: 614-616.
113. Kok KF, Hoevenaars B, Waanders E, Drenth JP. Value of molecular analysis of Wilson's disease in the absence of tissue copper deposits: a novel *ATP7B* mutation in an adult patient. *Neth. J. Med.* 2008;66: 348-350.
114. Yamaguchi A, Matsuura A, Arashima S, Kikuchi Y, Kikuchi K. Mutations of *ATP7B* gene in Wilson disease in Japan: identification of nine mutations and lack of clear founder effect in a Japanese population. *Hum. Mutat.* 1998;11: S320-322.
115. Santhosh S, Shaji RV, Eapen CE, Jayanthi V, Malathi S, Finny P et al. Genotype phenotype correlation in Wilson's disease within families-a report on four south Indian families. *World. J. Gastroenterol.* 2008;14: 4672-4676.
116. Balakrishnan P, Kabra M, Arora NK, Kalra V. Gene symbol: *ATP7B*. *Hum. Genet.* 2007;120: 917.
117. Seto WK, Mak CM, But D, Hung L, Lam CW. Mutational analysis for Wilson's disease. *Lancet.* 2009;374: 662.
118. Lee JY, Kim YH, Kim TW, Oh SY, Kim DS, Shin BS. New novel mutation of the *ATP7B* gene in a family with Wilson disease. *J. Neurol. Sci.* 2012;313: 129-131.
119. Wan L, Tsai CH, Tsai Y, Hsu CM, Lee CC, Tsai FJ. Mutation analysis of Taiwanese Wilson disease patients. *Biochem. Biophys. Res. Commun.* 2006;345: 734-738.
120. Ye XN, Mao LP, Lou YJ, Tong HY. Hemolytic anemia as first presentation of Wilson's disease with uncommon *ATP7B* mutation. *Int. J. Clin. Exp. Med.* 2015;8: 4708-4711.
121. A-Tobi M, Kashoob M, Joshi S, Bayoumi R. A novel splice-site allelic variant is responsible for Wilson disease in an Omani family. *Sultan. Qaboos. Univ. Med. J.* 2000;11: 357-362.
122. Sundaresan S, Eapen CE, Shaji RV, Chandy M, Kurian G, Chandy G. Screening for mutations in *ATP7B* gene using conformation-sensitive gel electrophoresis in a family with Wilson's disease. *Med. Sci. Monit.* 2007;13: CS38-CS40.
123. Olsson C, Waldenstrom E, Westermarck K, Landegre U, Syvanen AC. Determination of the frequencies of ten allelic variants of the Wilson disease gene (*ATP7B*), in pooled DNA samples. *Eur. J. Hum. Genet.* 2000;8: 933-938.
124. Chen L, Li X, Zheng Z, Lu X, Lin M, Pan C et al. A novel *ATP7B* gene mutation in a liver failure patient with normal ceruloplasmin and low serum alkaline phosphatase. *Gene.* 2014;538: 204-206.
125. Prasad R, Kaur G, Kumar S, Thapa BR. Two novel mutations (2976INS A, 4311ins A) of *ATP7B* in a patient with Wilson's disease coexisting with glucose-6-phosphate dehydrogenase deficiency. *J. Gastroenterol. Hepatol.* 2005;20: 660-662.
126. Kumar S, Thapa BR, Kaur G, Prasad R. Familial gene analysis for Wilson disease from north-west Indian patients. *Ann. Hum. Biol.* 2006;33: 177-186.
127. Zhu HW, Tao ZB, Su G, Jin QY, Zhao LT, Zhu JR et al. Identification of two novel mutations in the *ATP7B* gene that cause Wilson's disease. *World. J. Pediatr.* 2017;13: 387-391.
128. Iida M, Terada K, Sambongic Y, Wakabayashic T, Miuraa N, Koyama K et al. Analysis of functional domains of Wilson disease protein (*ATP7B*) in *Saccharomyces cerevisiae*. *FEBS. Lett.* 1998;428: 281-285.
129. Karunas AS, Mersiianova IV, Poliakov AV, Evgrafov OV, Khusnutdinova EK. Analysis of mutations and haplotypes of polymorphic markers in patients with Wilson-Konovalov disease from Bashkir. *Genetika.* 2000;36: 972-979.
130. Hsi G, Cullen LM, Macintyre G, Chen MM, Glerum DM, Cox DW. Sequence variation in the ATP-binding domain of the Wilson disease transporter, *ATP7B*, affects copper transport in a yeast model system. *Hum. Mutat.* 2008;29: 491-501.
131. Morgan CT, Tsivkovskii R, Kosinsky YA, Efremov RG, Lutsenko S. The distinct functional properties of the nucleotide-binding domain of *ATP7B*, the human copper-transporting ATPase: analysis of the Wilson disease mutations E1064A, H1069Q, R1151H, and C1104F. *J. Biol. Chem.* 2004;279: 36363-36371.
132. Misrahi, M. submitted to <http://www.wilsondisease.med.ualberta.ca/database.asp>.
133. Tanzi RE, Petrukhin K, Chernov I, Pellequer JL, Wasco W, Ross B et al. The Wilson disease gene is a copper transporting ATPase with homology to the Menkes disease gene. *Nat. Genet.* 1993;5: 344-350.
134. Houwen RH, Juyn J, Hoogenraad TU, Ploos van Amstel JK, Berger R. H714Q mutation in Wilson disease is associated with late, neurological presentation. *J. Med. Genet.* 1995;32: 480-482.
135. Czlonkowska A, Rodo M, Gajda J, Ploos van Amstel HK, Juyn J, Houwen RH. Very high frequency of the His1069Gln mutation in Polish Wilson disease patients. *J. Neurol.* 1997;244: 591-592.
136. Maier-Dobersberger T, Ferenci P, Polli C, Balać P, Dienes HP, Kaserer K et al. Detection of the His1069Gln mutation in Wilson disease by rapid polymerase chain reaction. *Ann. Intern. Med.* 1997;127: 21-26.
137. Ivanova-Smolenskaya IA, Ovchinnikov IV, Karabanov AV, Deinek NL, Poleshchuk VV, Markova ED et al. The His1069Gln mutation in the *ATP7B* gene in Russian patients with Wilson disease. *J. Med. Genet.* 1999;36: 174.
138. Okkeri J, Bencomo E, Pietila M, Haltia T. Introducing Wilson disease mutations into the zinc-transporting P-type ATPase of *Escherichia coli*. The mutation P634L in the 'hinge' motif (GDGXNDXP) perturbs the formation of the E2P state. *Eur. J. Biochem.* 2002;269: 1579-1586.
139. Machado AAC, Deguti MM, Genschel J, Cançado ELR, Bochow B, Schmidt H et al. Neurological manifestations and *ATP7B* mutations in Wilson's disease. *Parkinsonism. Relat. Disord.* 2008;14: 246-249.
140. El-Mougy FA, Sharaf SA, Elsharkawy MM, Mandour IA, El-Essawy RA, Eldin AM et al. Gene mutations in Wilson disease in Egyptian children: report on two novel mutations. *Arab. J. Gastroenterol.* 2014;15: 114-118.
141. Guggilla SR, Senagari JR, Rao PN, Madireddi S. Spectrum of mutations in the ATP binding domain of *ATP7B* gene of Wilson Disease in a regional Indian cohort. *Gene.* 2015;569: 83-87.
142. Loudianos G, Dessi V, Lovicu M, Angius A, Figus A, Lilliu F et al. Molecular characterization of wilson disease in the Sardinian population-evidence of a founder effect. *Hum. Mutat.* 1999;14: 294-303.
143. Paradisi I, De Freitas L, Arias S. Most frequent mutation c.3402delC (p.Ala1135GlnfsX13) among Wilson disease patients in Venezuela has a wide distribution and two old origins. *Eur. J. Med. Genet.* 2015;58: 59-65.
144. Shiono Y, Wakusawa S, Hayashi H, Takikawa T, Yano M, Okada T et al. Iron accumulation in the liver of male patients with Wilson's disease. *Am. J. Gastroenterol.* 2001;96: 3147-3151.
145. Hayashi H, Wakusawa S, Yano M, Okada T. Genetic background of Japanese patients with adult-onset storage diseases in the liver. *Hepatol. Res.* 2007;37: 777-783.
146. Wu ZY, Zhao GX, Chen WJ, Wang N, Wan B, Lin MT et al. Genetic variation spectrum in *ATP7B* gene identified in Latvian patients with Wilson disease. *Mol. Genet. Genomic. Med.* 2005;4: 405-409.
147. Wu, Z. Y. et al. Mutation analysis of 218 Chinese patients with Wilson disease revealed no correlation between the canine copper toxicosis gene *MURR1* and Wilson disease. *J. Mol. Med. (Berl.)* 84, 438-442 (2006).

148. Orru S, Thomas G, Loizedda A, Cox DW, Contu L. 24 bp deletion and Ala1278 to Val mutation of the *ATP7B* gene in a Sardinian family with Wilson disease. *Hum. Mutat.* 1997;10: 84-85.
149. Leggio L, Addolorato G, Loudianos G, Abenavoli L, Lepori MB, Vecchio FM et al. A new mutation of Wilson's disease P-type ATPase gene in a patient with cirrhosis and coombs-positive hemolytic anemia. *Dig. Dis. Sci.* 2006;51: 34-38.
150. Ohya K, Abo W, Tamaki H, Suawara C, Endo T, Nomachi S et al. Presymptomatic diagnosis of Wilson disease associated with a novel mutation of the *ATP7B* gene. *Eur. J. Pediatr.* 2002;161: 124-126.
151. Kusuda Y, Hamaguchi K, Mori T, Shin R, Seike M, Sakata T. Novel mutations of the *ATP7B* gene in Japanese patients with Wilson disease. *J. Hum. Genet.* 2000;45: 86-91.
152. Prella M, Baccala R, Horisberger JD, Belin D, Di Raimondo F, Invernizzi R et al. Haemolytic onset of Wilson disease in a patient with homozygous truncation of *ATP7B* at Arg1319. *Br. J. Haematol.* 2001;114: 23-232.
153. Al Jumah M, Majumdar R, Al Rajeh S, Awada A, Al Zaben A, Al Traif et al. A clinical and genetic study of 56 Saudi Wilson disease patients: identification of Saudi-specific mutations. *Eur. J. Neurol.* 2004;11: 121-124.
154. Majumdar R, Al-Jumah M, Zaidan R. A rare homozygous missense mutation in *ATP7B* exon 19 in a case of Wilson disease. *Eur. Neurol.* 2004;51: 52-54.
155. Moller LB, Ott P, Lund C, Horn N. Homozygosity for a gross partial gene deletion of the C-terminal end of *ATP7B* in a Wilson patient with hepatic and no neurological manifestations. *Am. J. Med. Genet. A.* 2005;138: 340-343.
156. Beyersdorff A, Findeisen A. Morbus Wilson: Case report of a two-year-old child as first manifestation. *Scand. J. Gastroenterol.* 2006;41: 496-497.
157. Majumdar R, Al Jumah M, Al Rajeh S, Fraser M, Al Zaben A, Awada A et al. A novel deletion mutation within the carboxyl terminus of the copper-transporting ATPase gene causes Wilson disease. *J. Neurol. Sci.* 2000;179: 140-143.
158. Hsi G, Cullen LM, Moira GD, Cox DW. Functional assessment of the carboxy-terminus of the Wilson disease copper-transporting ATPase, *ATP7B*. *Genomics.* 2004;83: 473-481.
159. Cater MA, La Fontaine S, Shield K, Deal Y, Mercer JF. *ATP7B* mediates vesicular sequestration of copper: insight into biliary copper excretion. *Gastroenterology.* 2006;130: 493-506.
